# Supplementary material for: Sesquiterpenoids and Xanthones from the Kiwifruit-Associated Fungus Bipolaris sp. and Their Anti-Pathogenic Microorganism Activity
Source: MDPI journal article supplement (doi:10.3390/jof8010009), 2021-12-23

Supporting information for

## **Sesquiterpenoids and Xanthones from Kiwi-Associated Fungus *Bipolaris* sp. and Their Anti-Pathogenic Microorganism Activity**

Jun-Jie Yu, Ying-Xue Jin, Shan-Shan Huang, and Juan He\*

School of Pharmaceutical Sciences, National Demonstration Center for Experimental Ethnopharmacology Education, South-Central University for Nationalities, Wuhan 430074, People's Republic of China; junjieyu98@outlook.com (J. J. Y); Yancy6020@163.com (Y. X. J.); HuangSS1998@126.com (S. S. H.)

\*Correspondence: 2015048@mail.scuec.edu.cn (J. H.)

# Content

## Sections S1. Supplementary of NMR, HRESIMS and CD spectra

- S1.1 NMR and HRESIMS spectra of bipolarisorokin A (1)
- S1.2 NMR and HRESIMS spectra of bipolarisorokin B (2)
- S1.3 NMR, HRESIMS and CD spectra of bipolarisorokin C (3)
- S1.4 NMR, HRESIMS and CD spectra of bipolarisorokin D (4)
- S1.5 NMR, HRESIMS and CD spectra of bipolarisorokin E (5)
- S1.6 NMR and HRESIMS spectra of bipolarisorokin F (6)
- S1.7 NMR, HRESIMS and CD spectra of bipolarisorokin G (7)
- S1.8 NMR, HRESIMS and CD spectra of bipolarisorokin H (8)
- S1.9 NMR and HRESIMS spectra of bipolarisorokin I (9)
- S1.10 NMR, HRESIMS and CD spectra of bipolarithone A (10)
- S1.11 NMR, HRESIMS and CD spectra of bipolarithone B (11)
- S1.12 NMR, HRESIMS and CD spectra of bipolarithone C (12)
- S1.13 NMR, HRESIMS and CD spectra of bipolarithone D (13)

## Sections S2. Computational details

- S2.1 Computational details for bipolarisorokin C (3) (ECD)
- S2.2 Computational details for bipolarisorokin G (7) (ECD)
- S2.3 Computational details for bipolarithone A (10) (ECD)
- S2.4 Computational details for bipolarithone B (11) (ECD)
- S2.5 Computational details for bipolarithone C (12) (ECD)
- S2.6 Computational details for 12a and 12d (NMR)
- S2.7 Computational details for bipolarithone D (13) (ECD)

## Sections S1. Supplementary of NMR, HRESIMS and CD spectra

### S1.1 NMR and HRESIMS spectra of bipolarisorokin A (1)

$^1\text{H}$  NMR spectrum

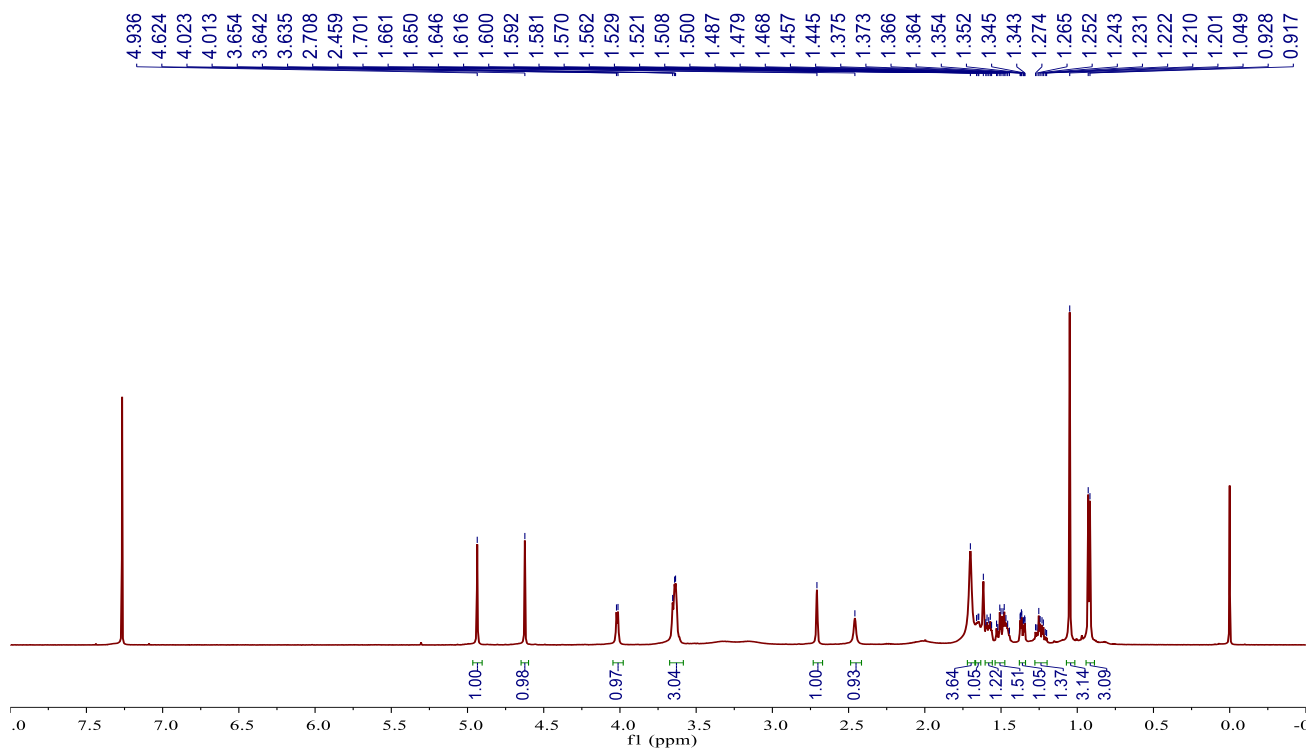

$^{13}\text{C}$  NMR and DEPT spectra

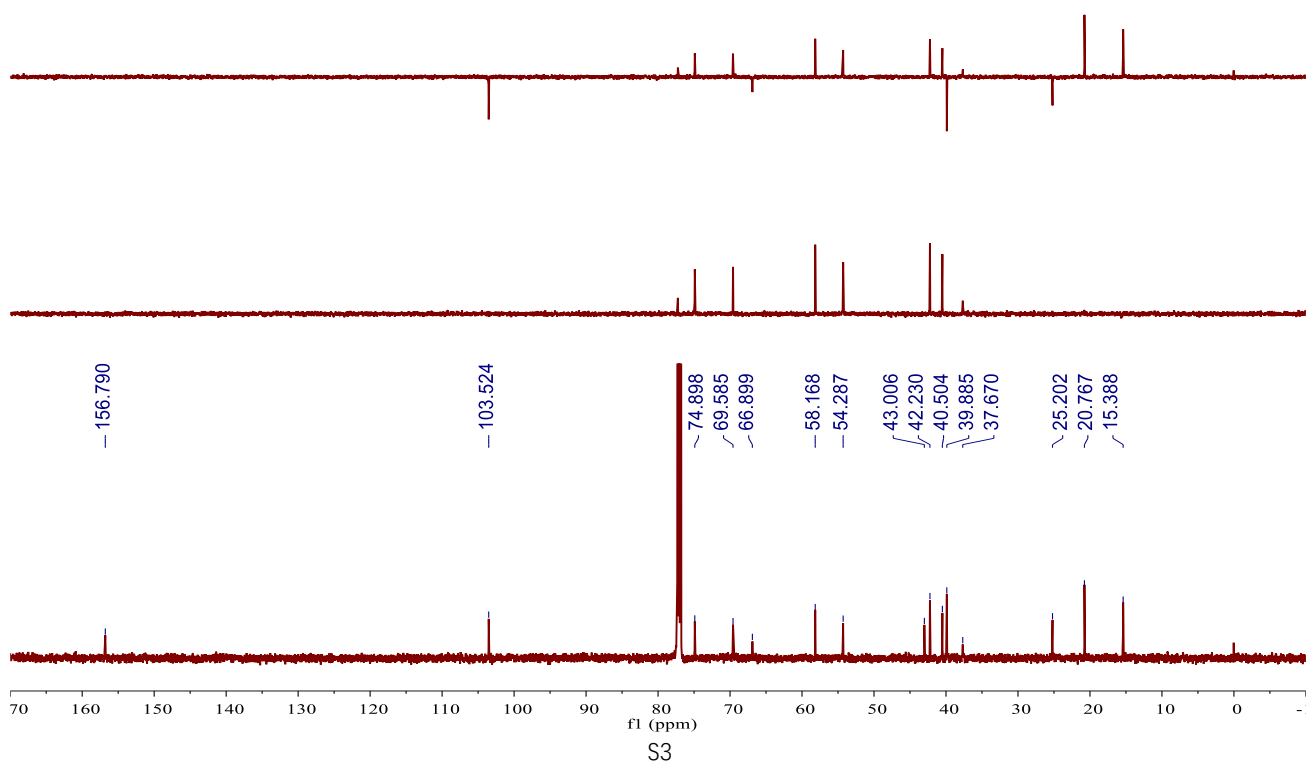

HSQC spectrum

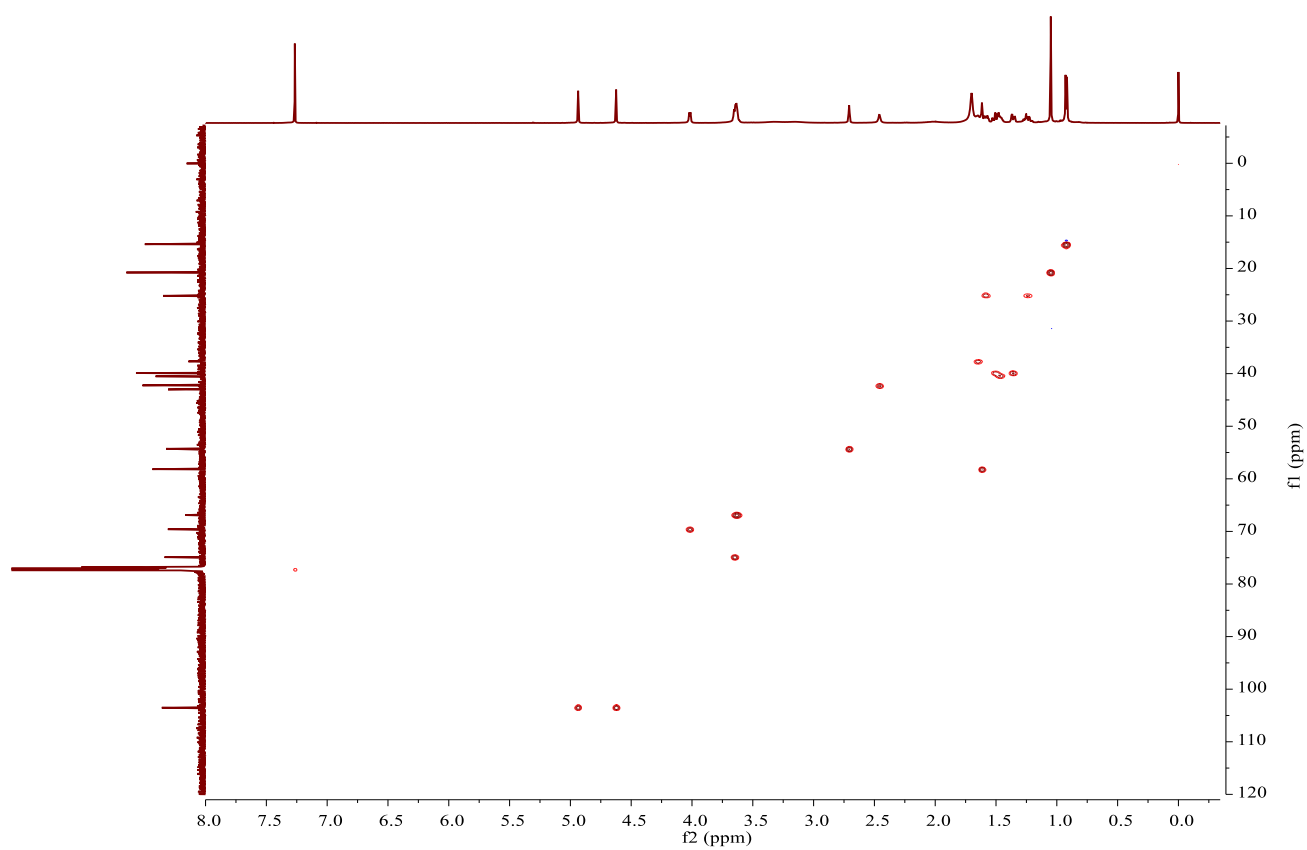

HMBC spectrum



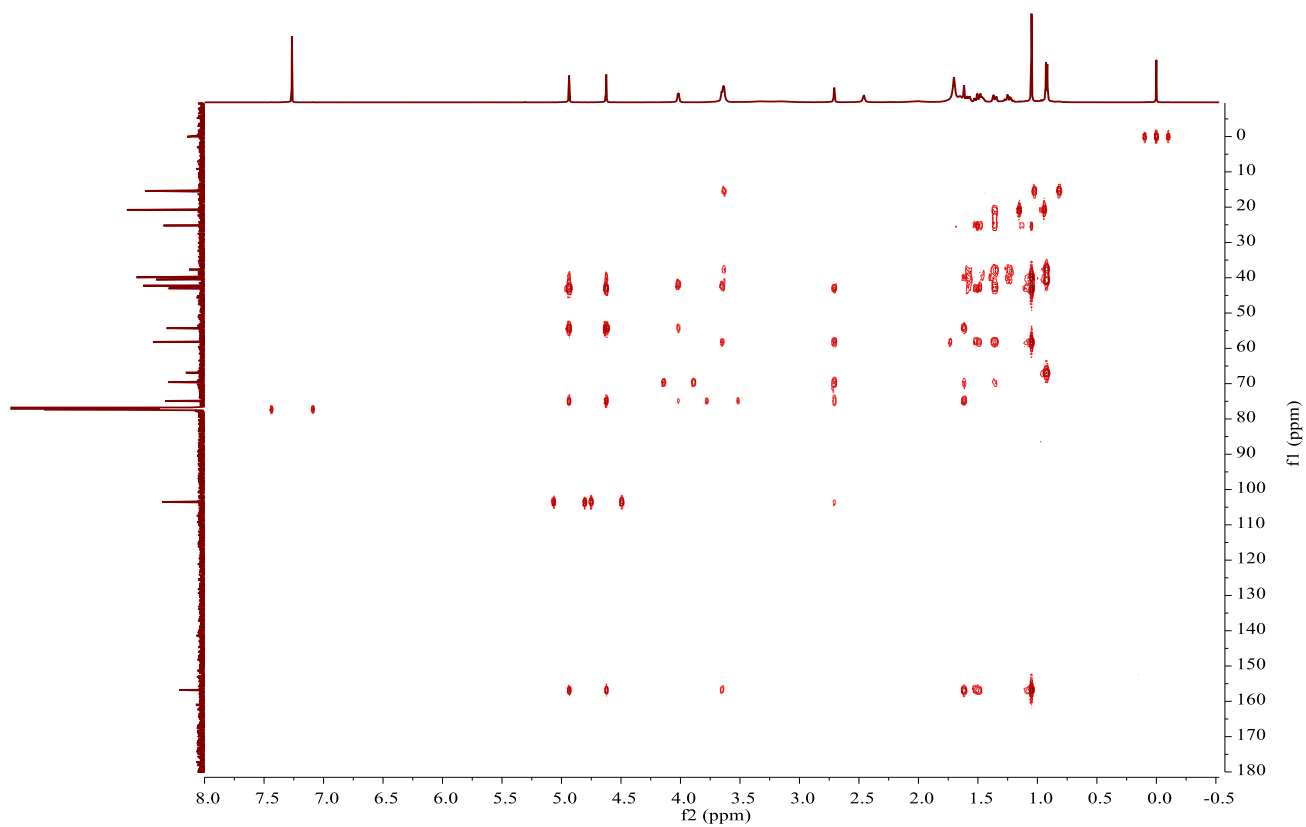

$^1\text{H}$ - $^1\text{H}$  COSY spectrum

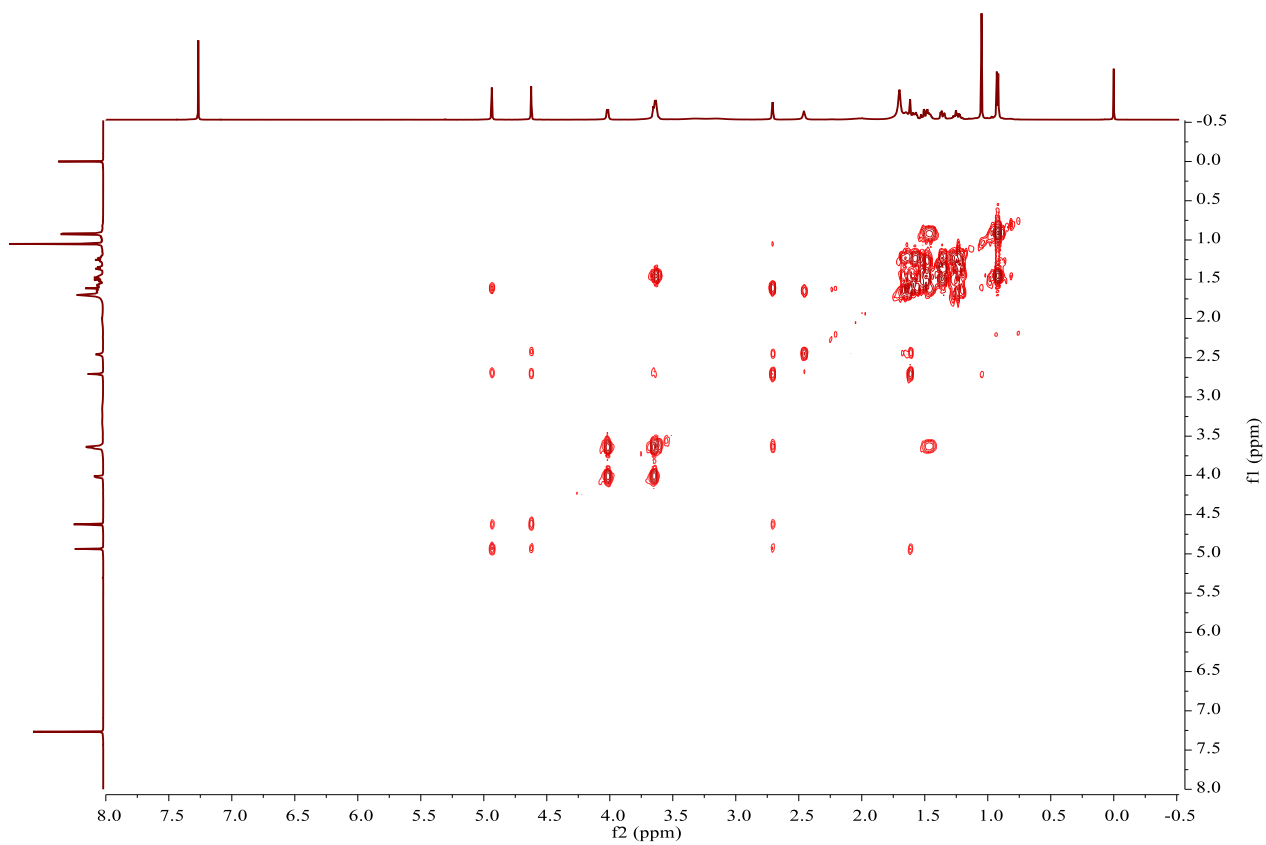

ROESY spectrum

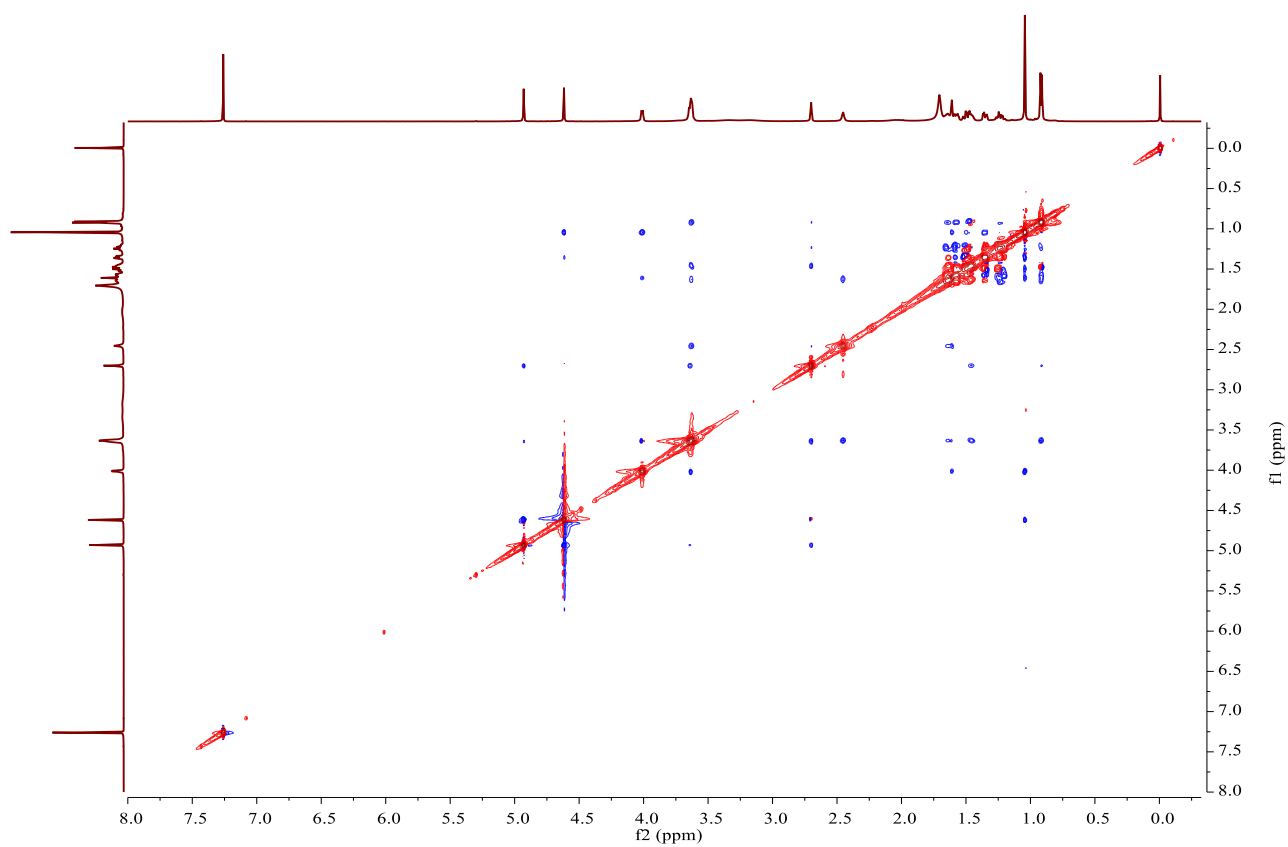

HRESIMS

T: FTMS - p ESI Full lock ms [150.0000-800.0000]

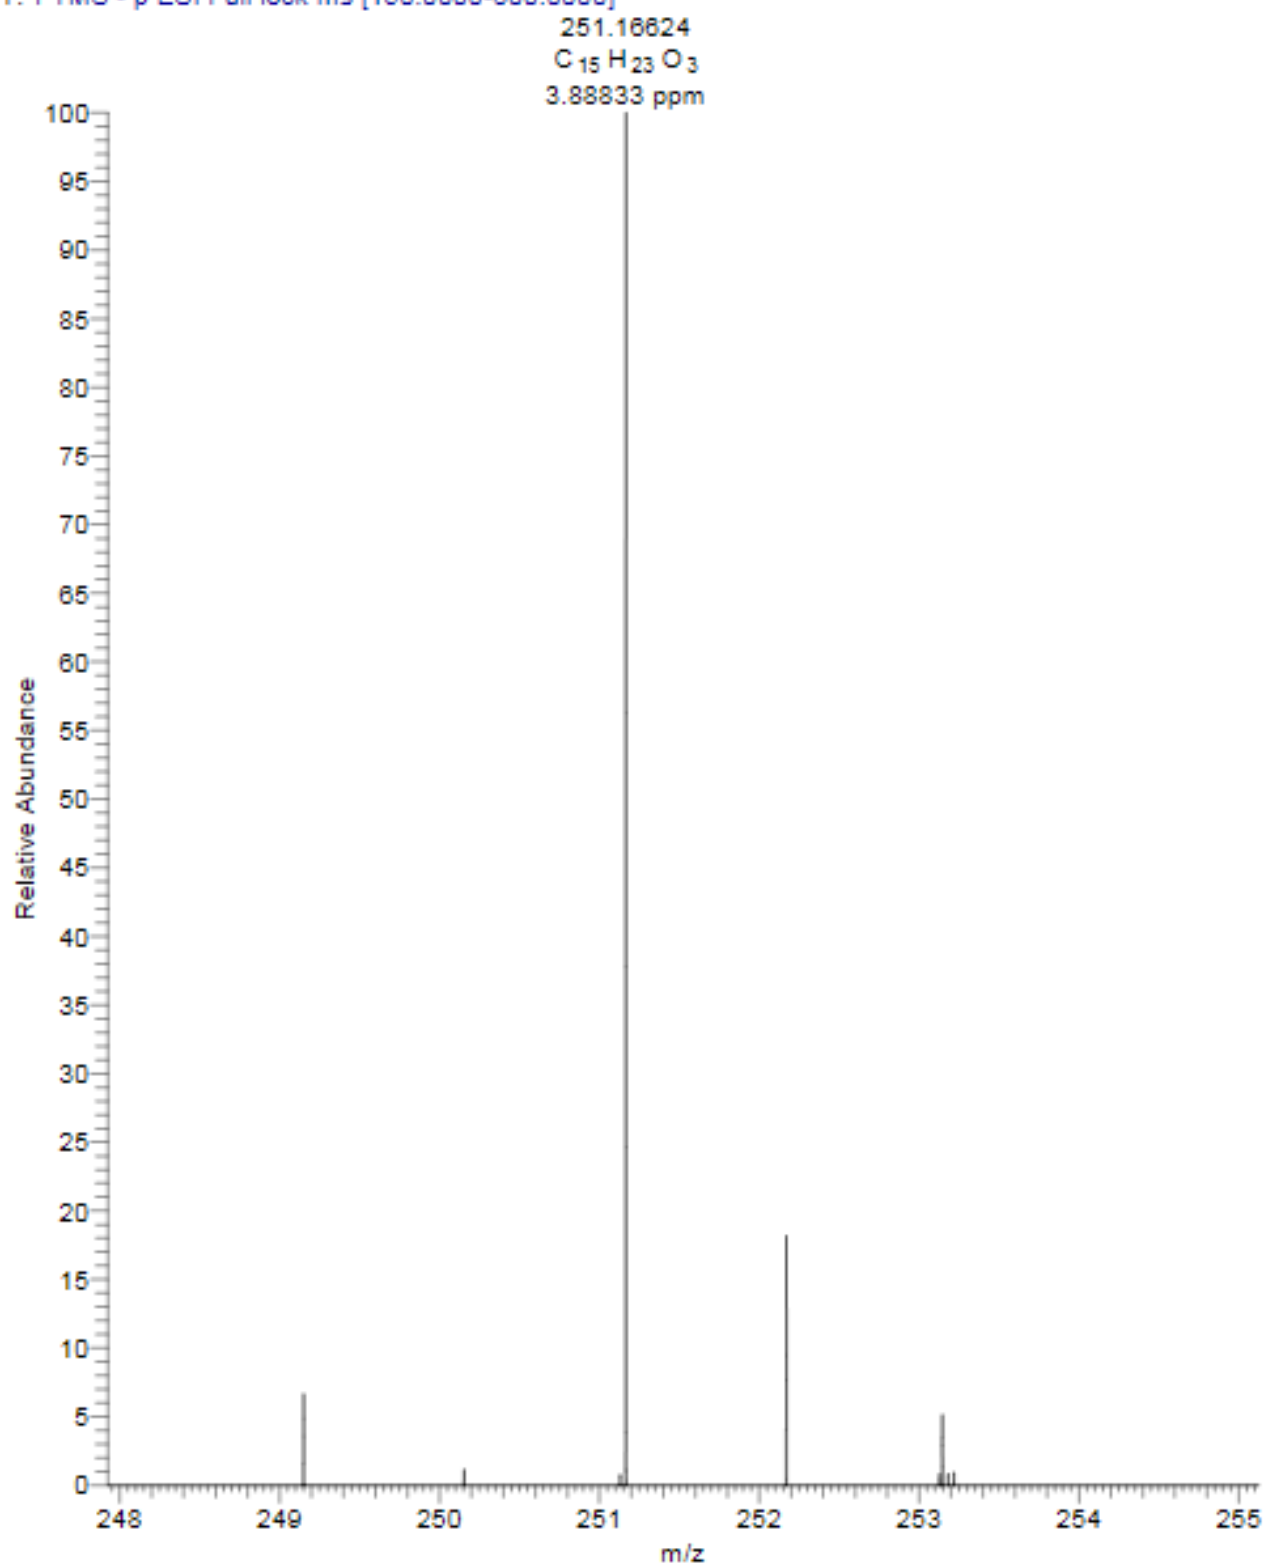

## S1.2 NMR and HRESIMS spectra of bipolarisorokin B (2)

### $^1\text{H}$ NMR spectrum

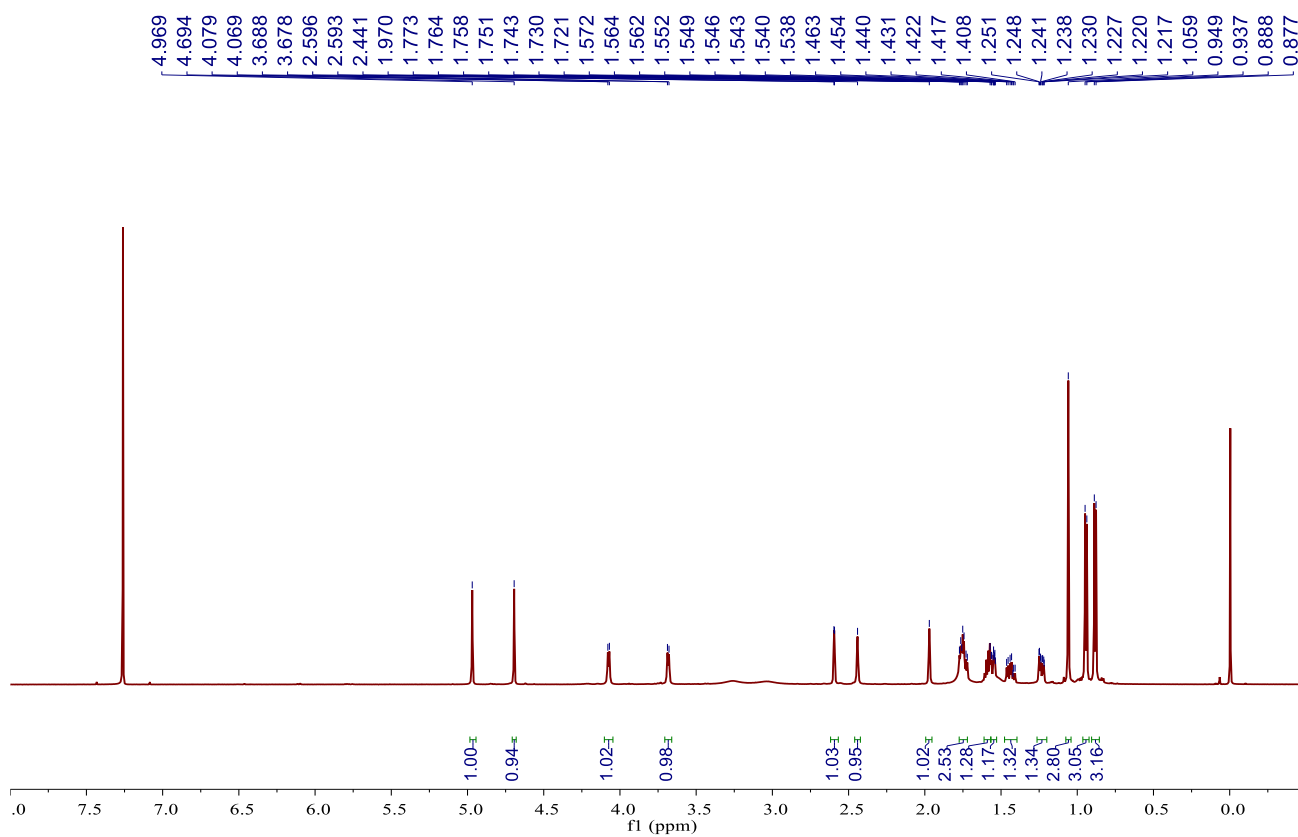

### $^{13}\text{C}$ NMR and DEPT spectra

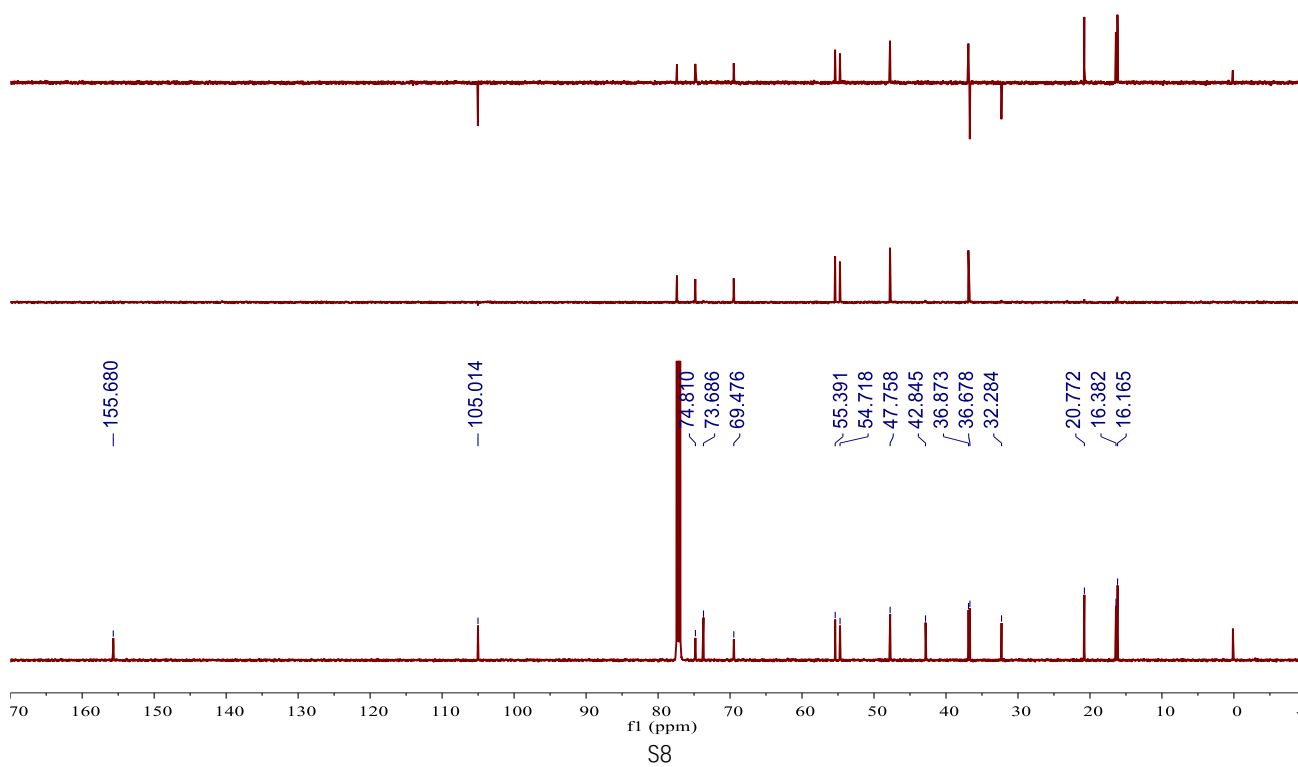

HSQC spectrum

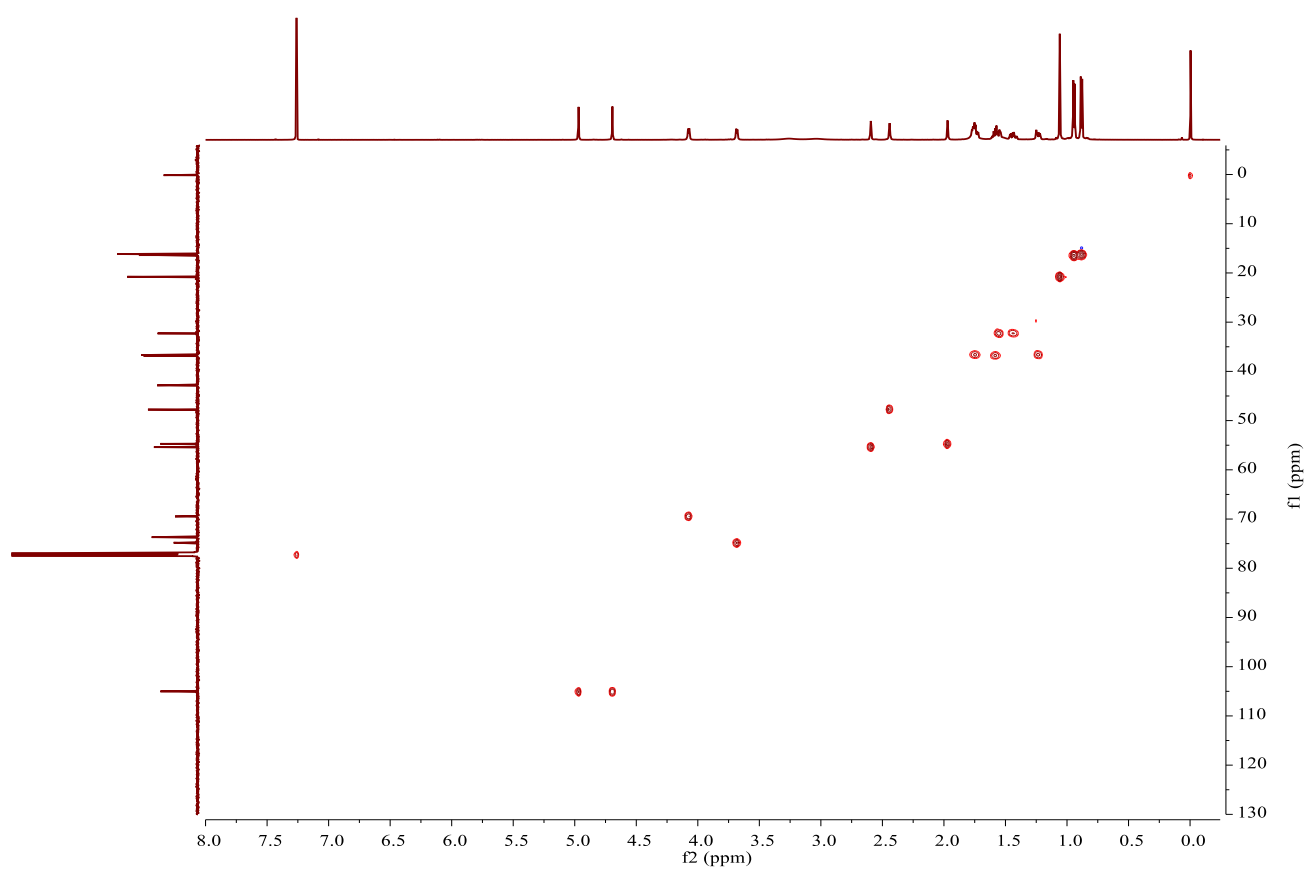

HMBC spectrum

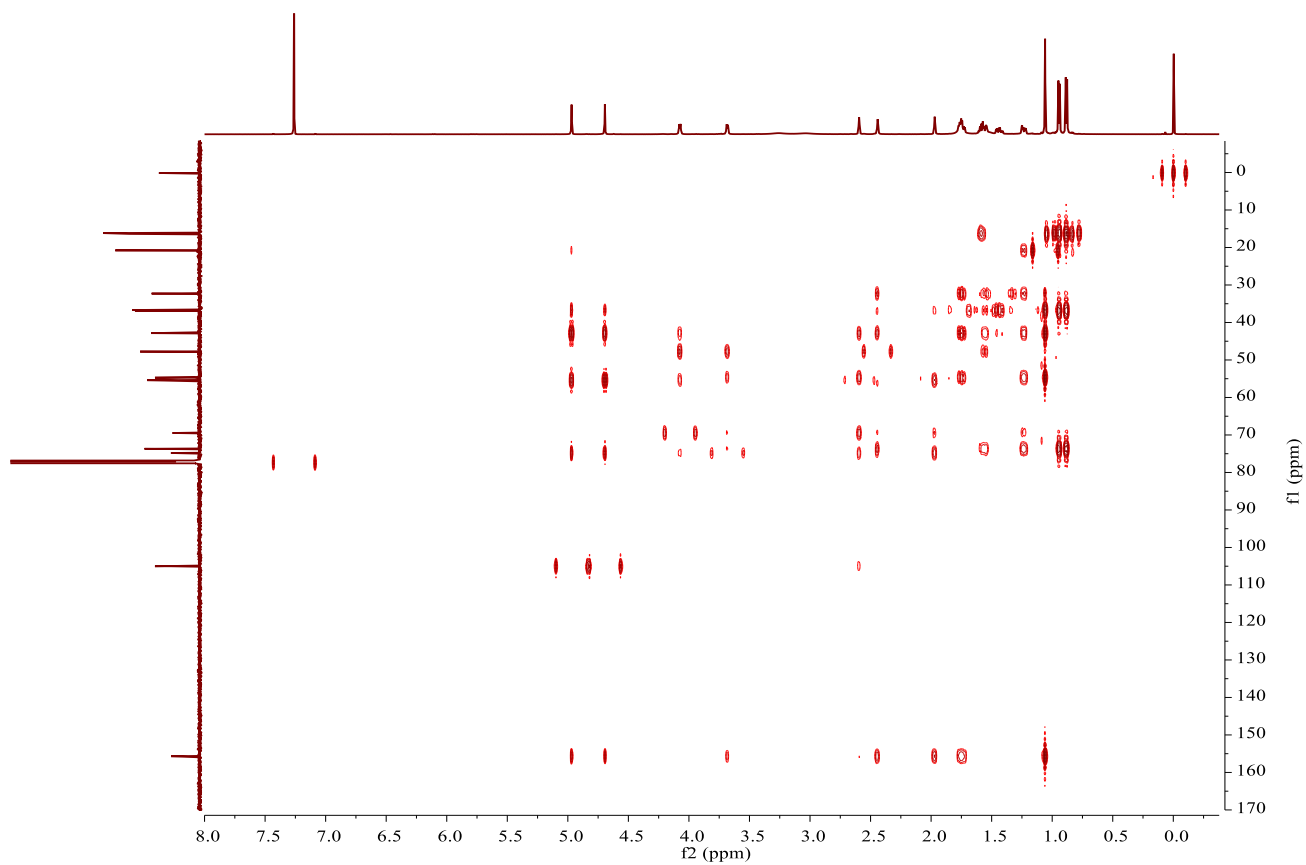

$^1\text{H}$ - $^1\text{H}$  COSY spectrum

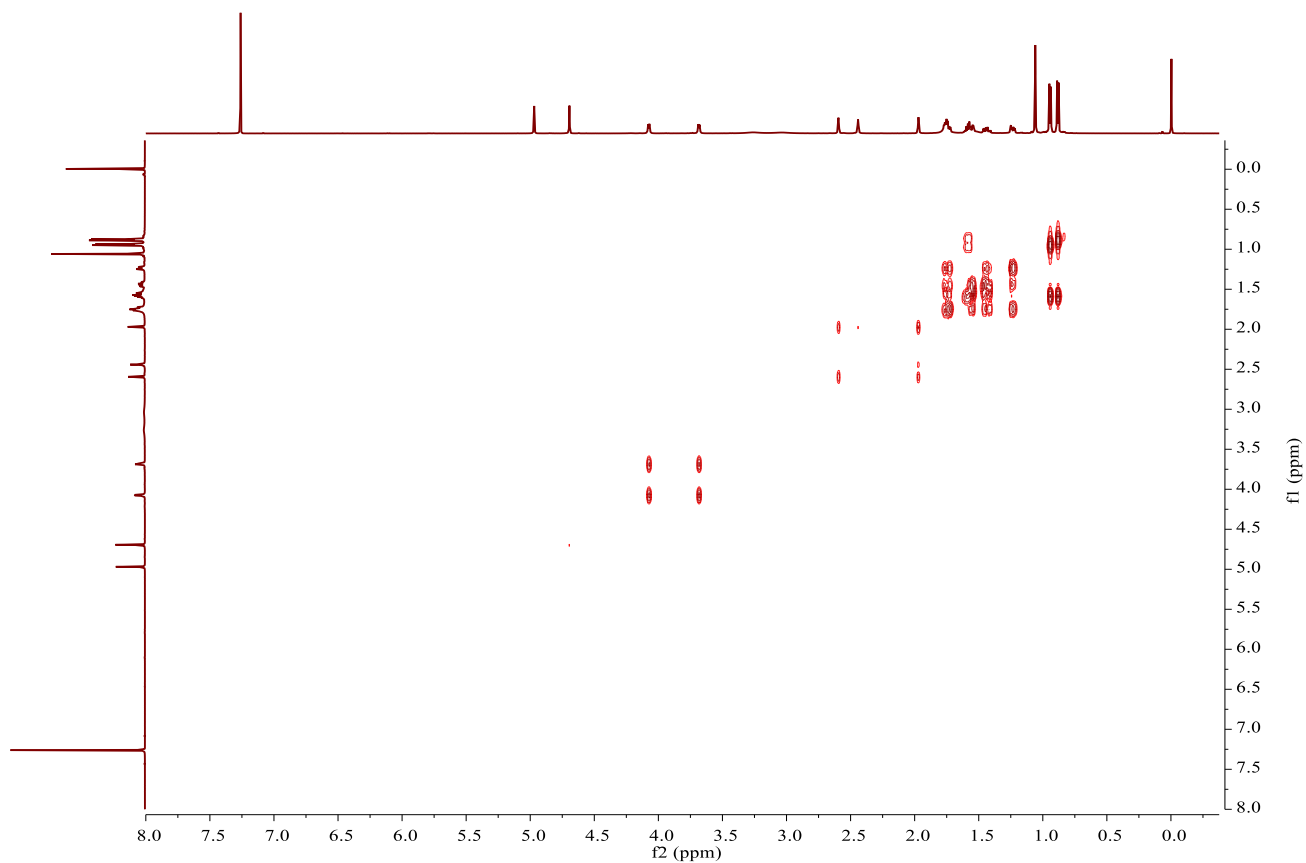

ROESY spectrum

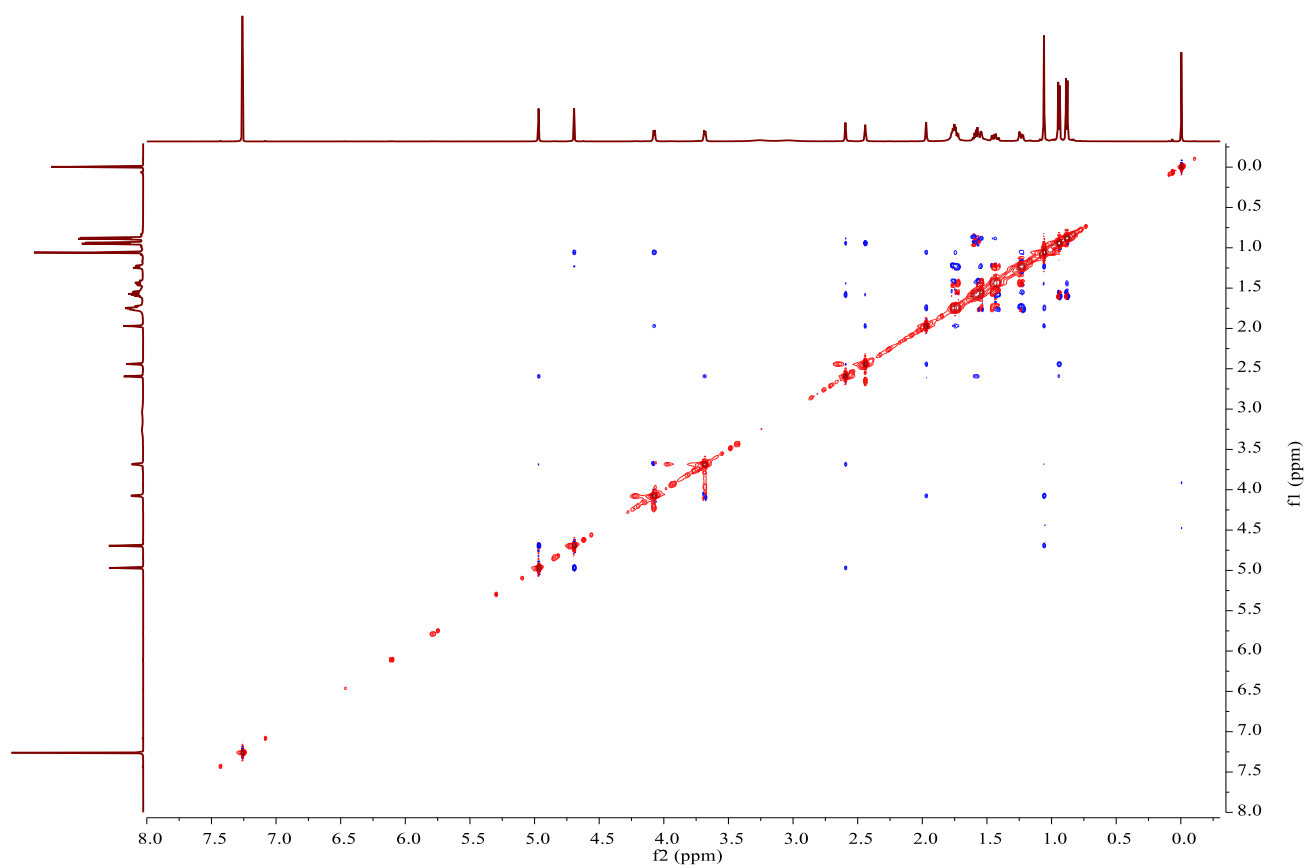

HRESIMS

7: FTMS + p ESI Full lock ms [150.0000-1100.0000]

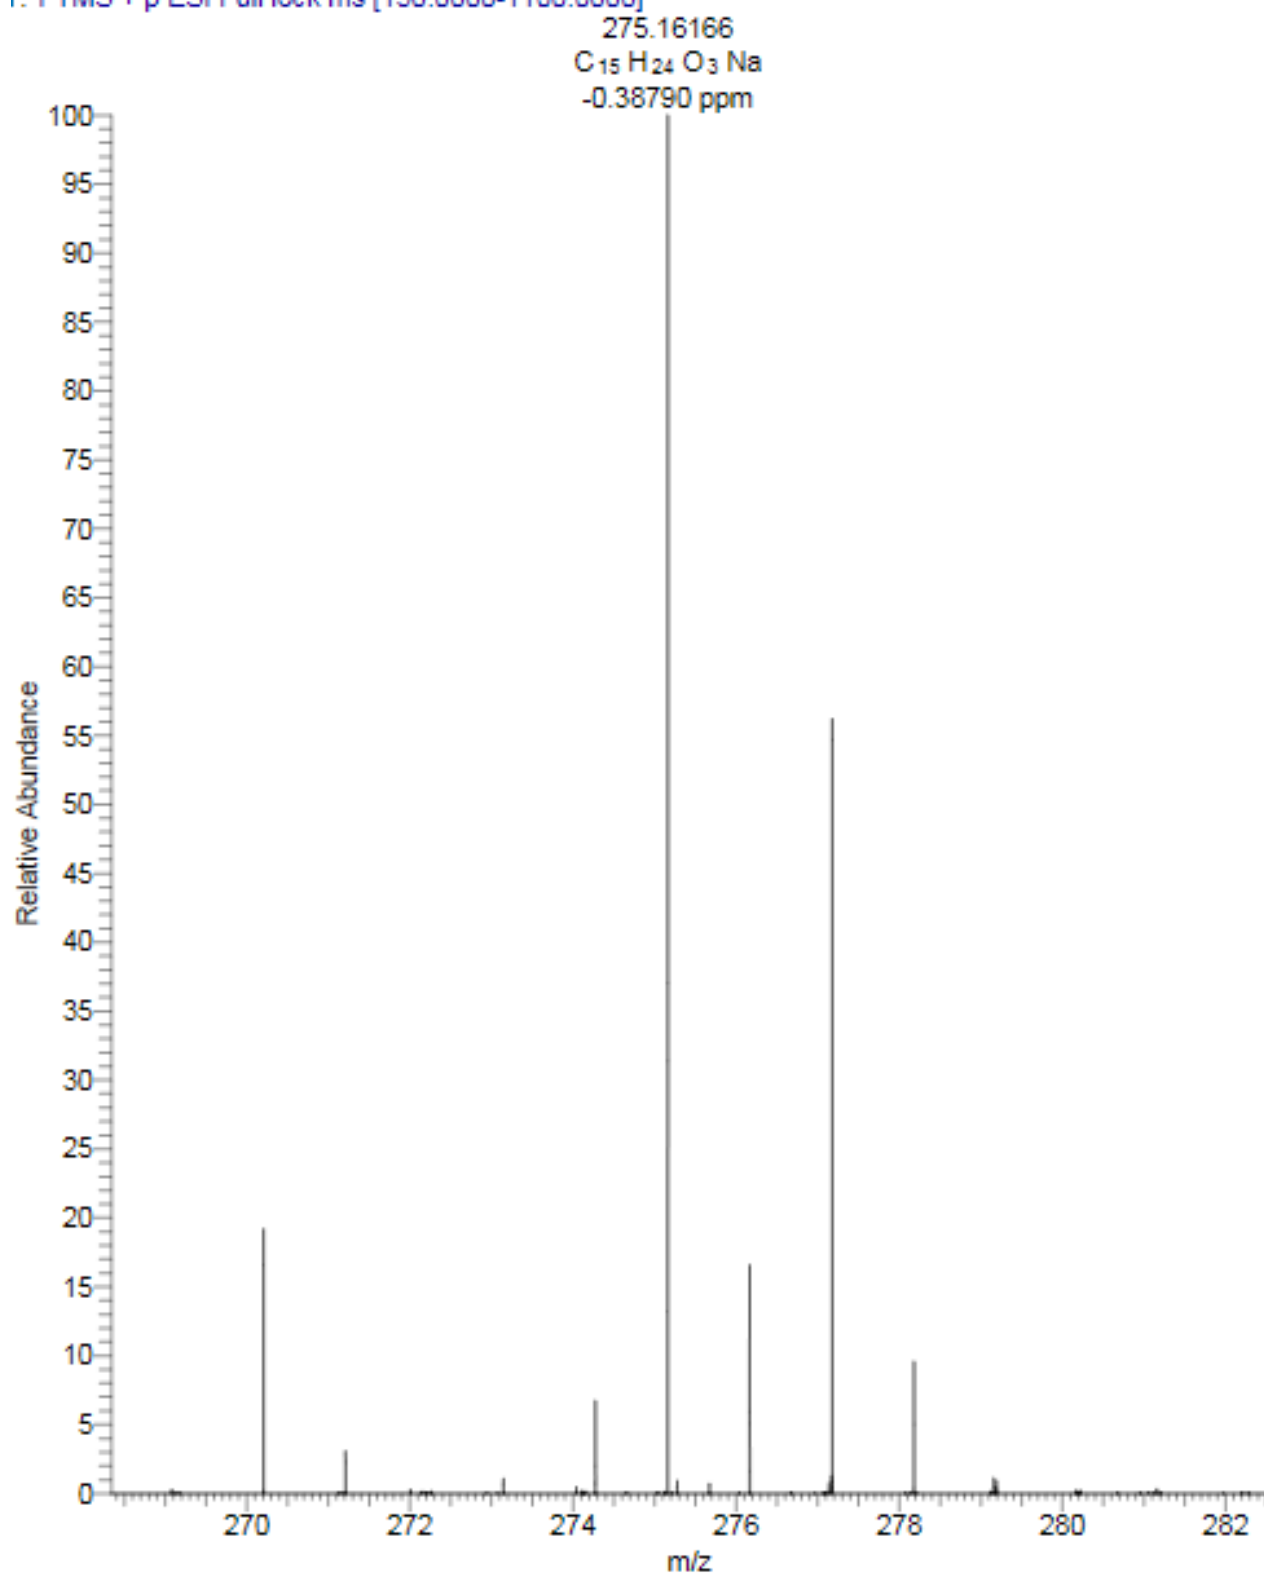



### S1.3 NMR, HRESIMS and CD spectra of bipolarisorokin C (3)

$^1\text{H}$  NMR spectrum

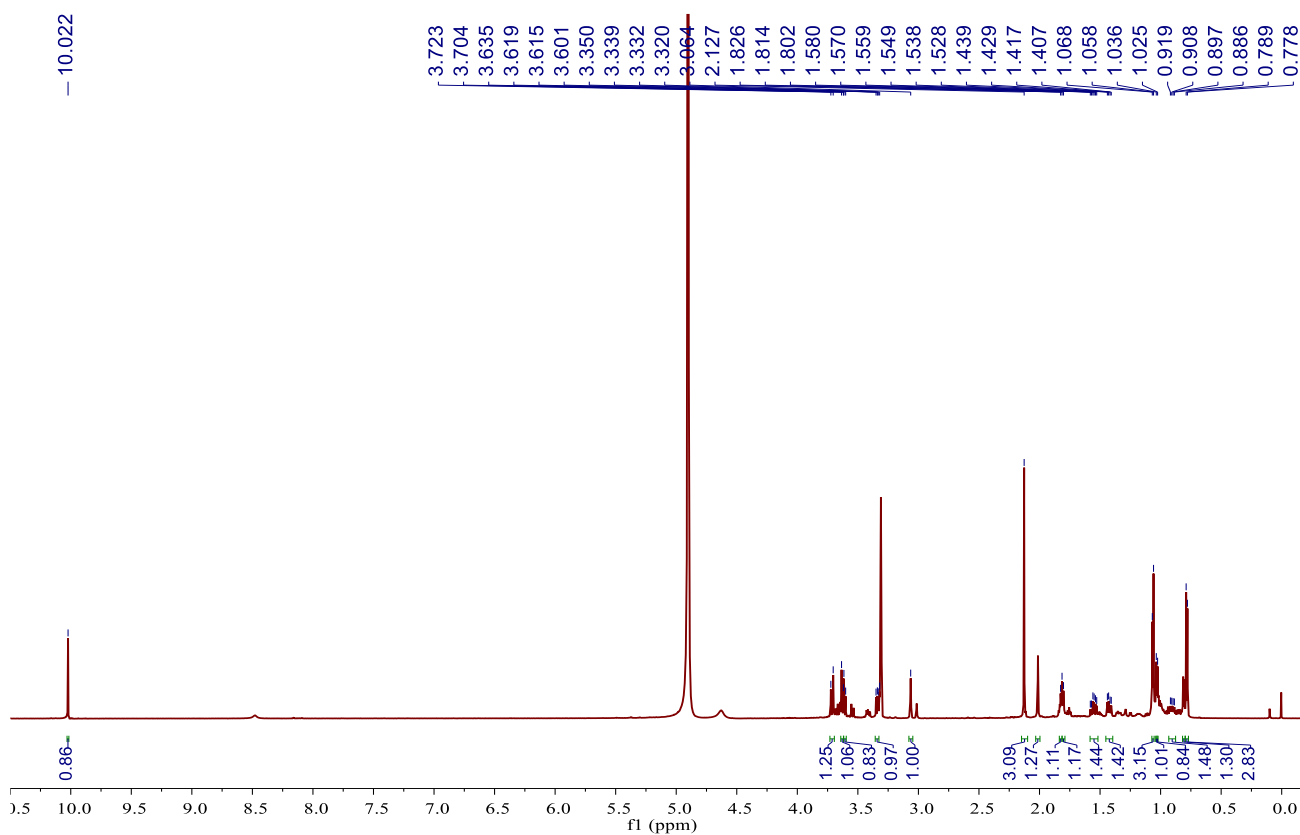

$^{13}\text{C}$  NMR and DEPT spectra

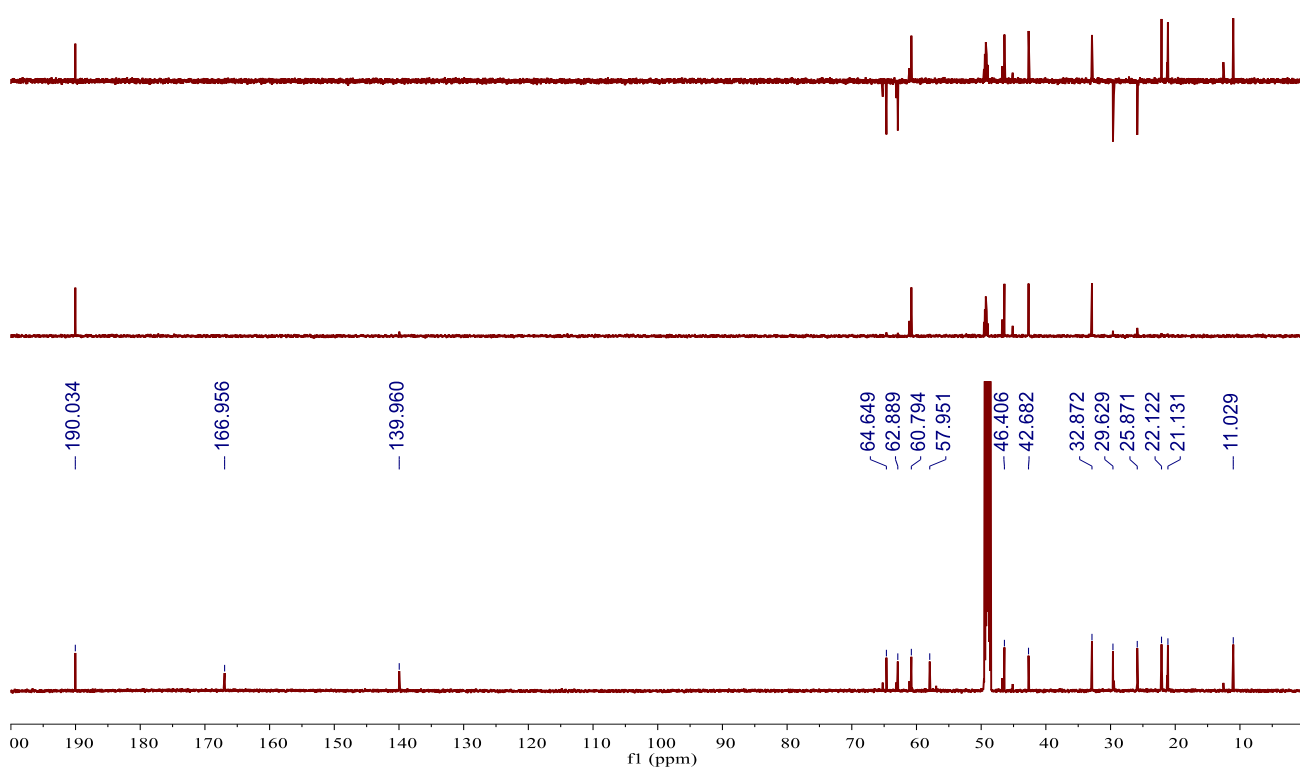

HSQC spectrum

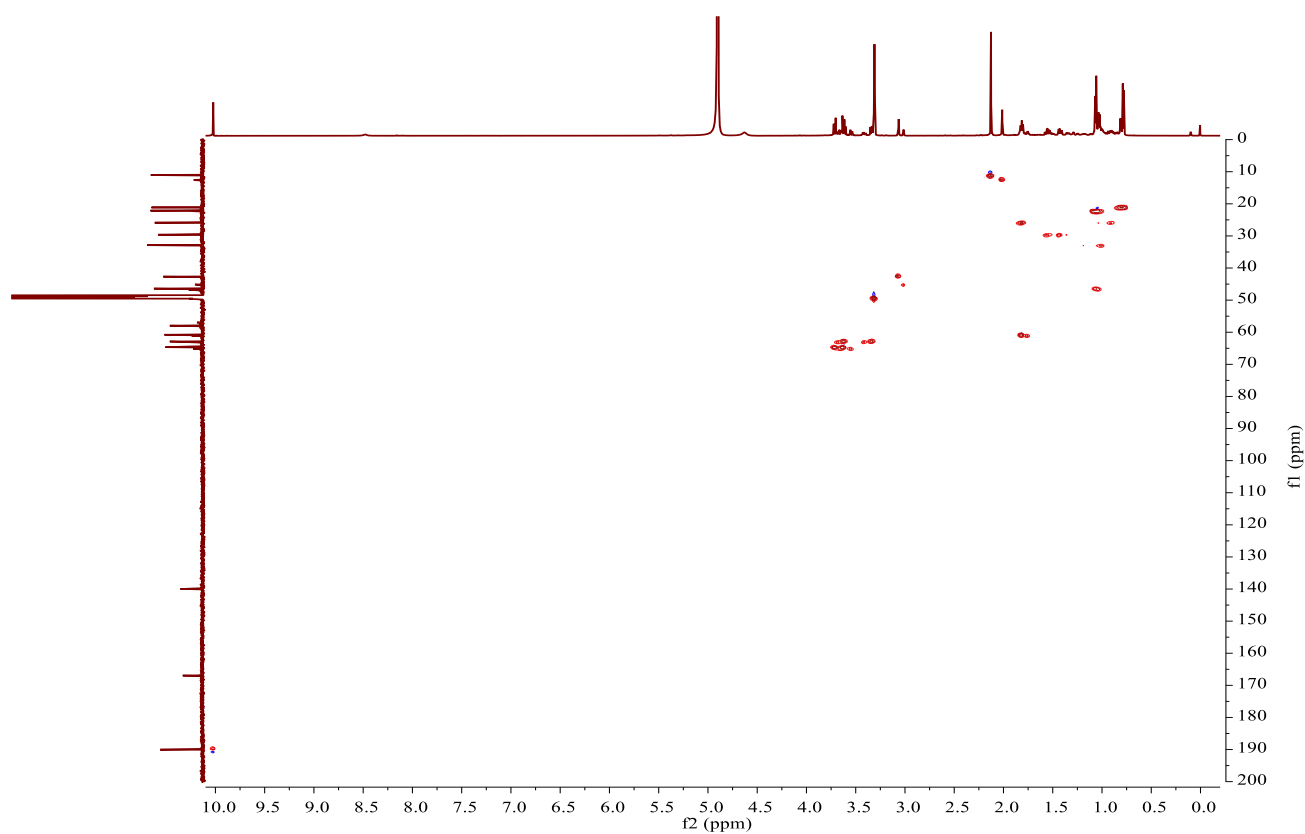

HMBC spectrum

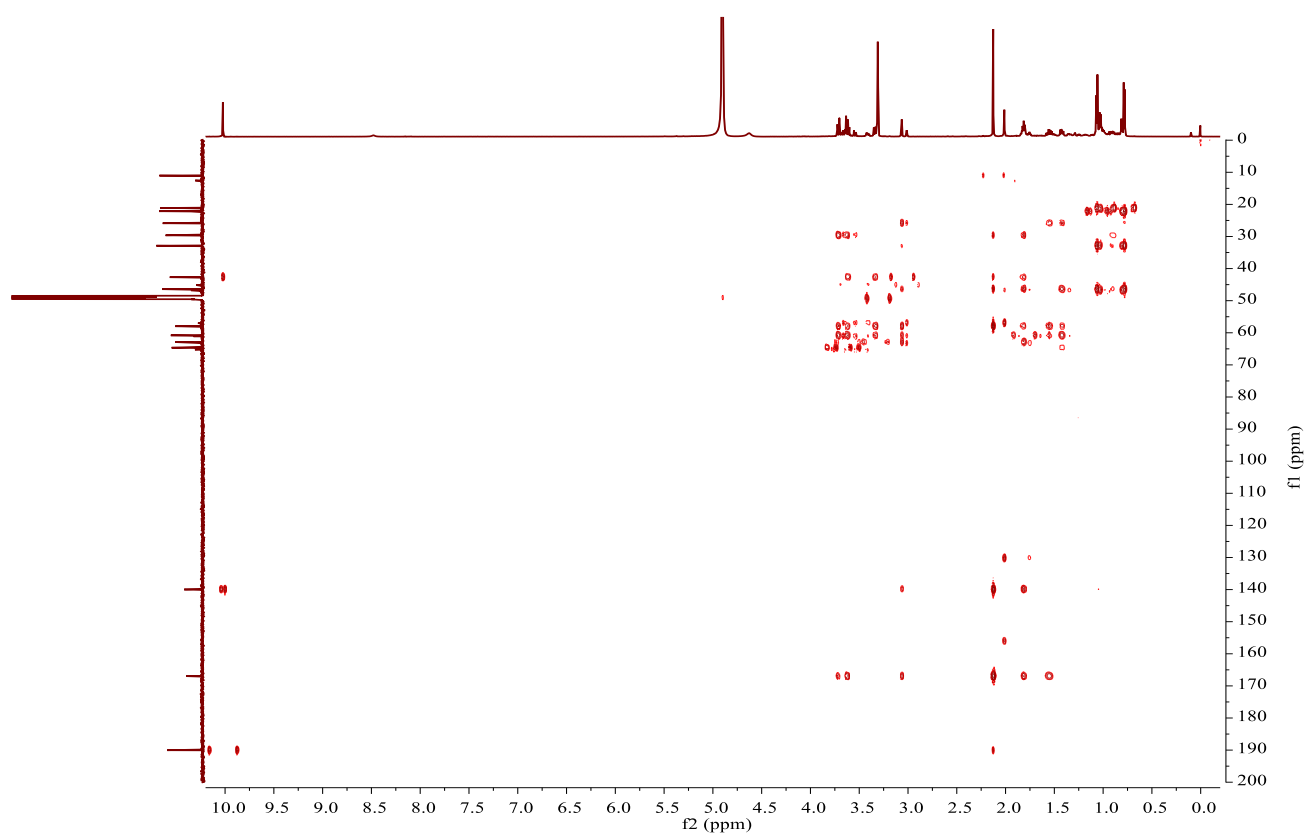

$^1\text{H}$ - $^1\text{H}$  COSY spectrum

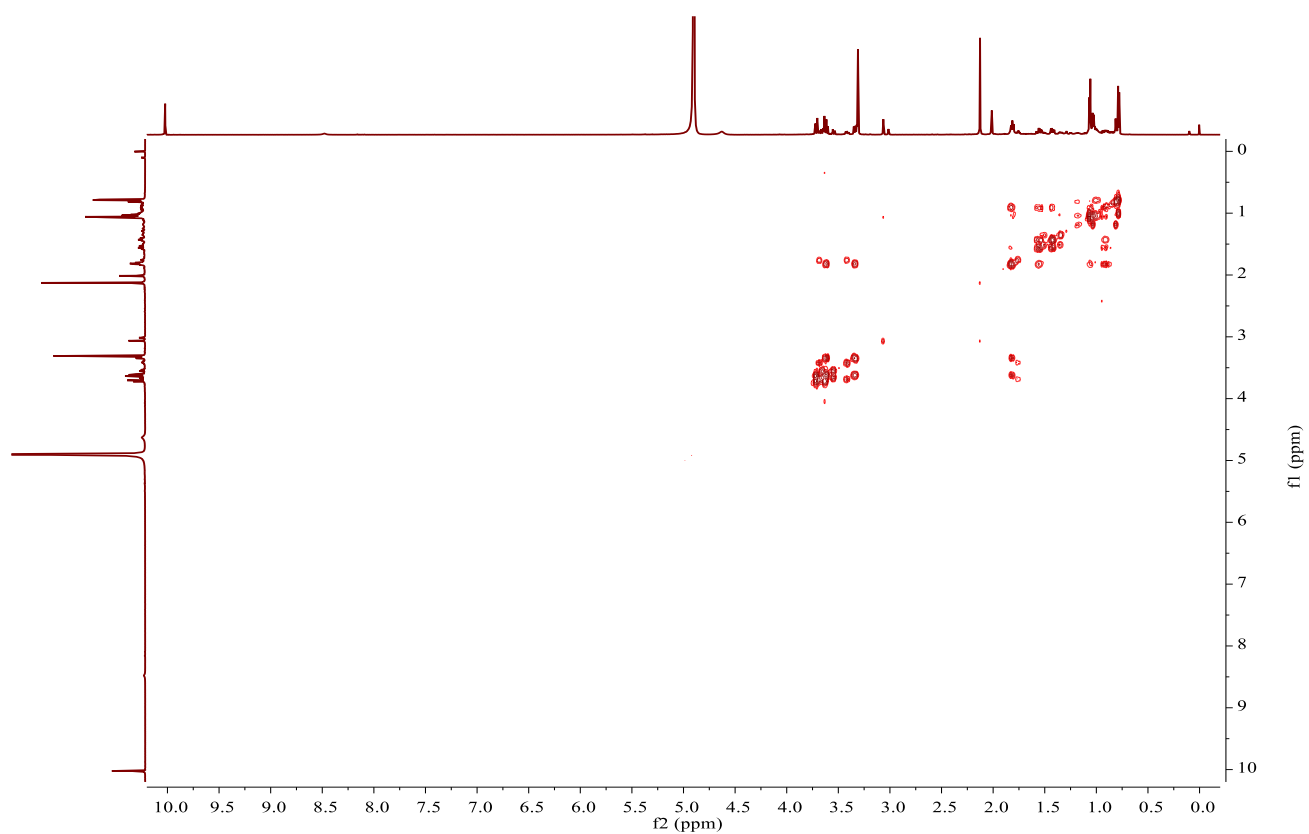

ROESY spectrum

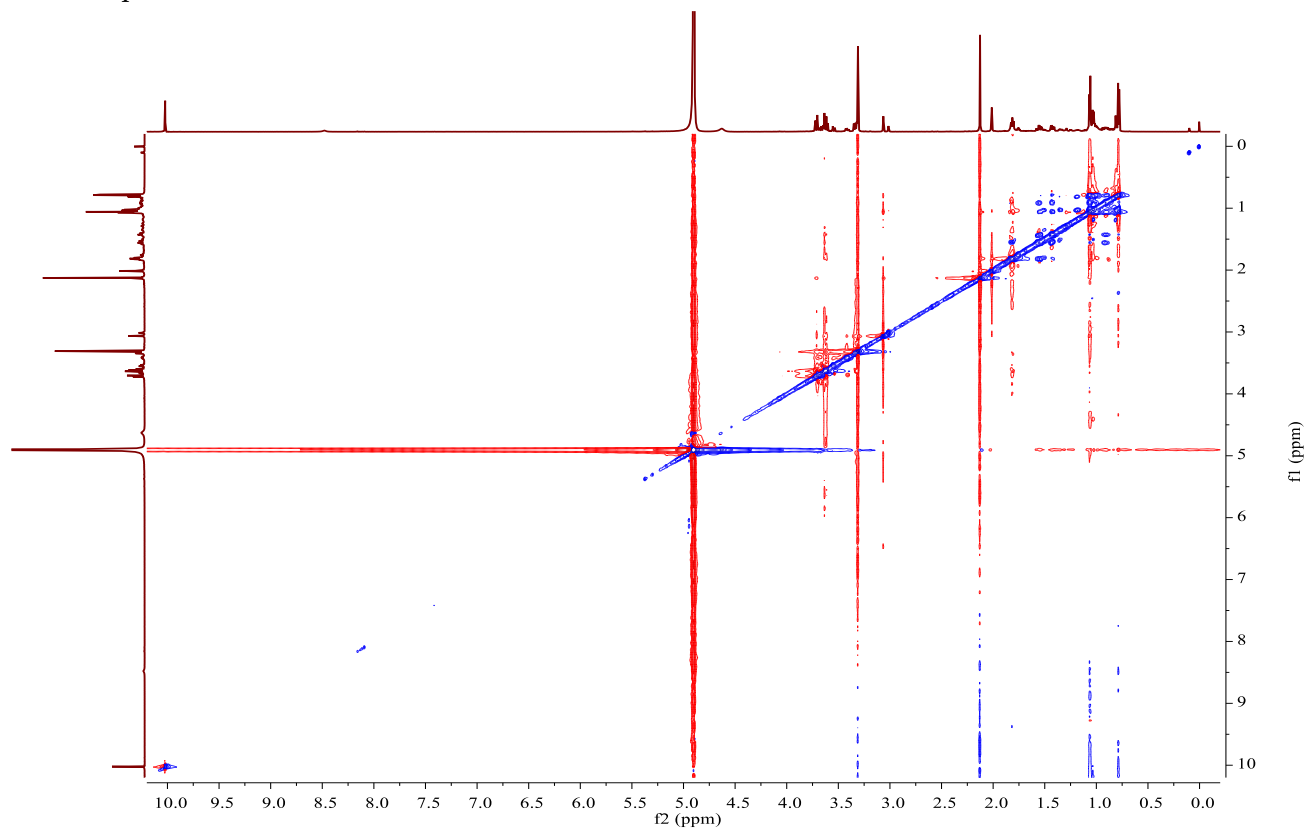

HRESIMS

T: FTMS + p ESI Full lock ms [150.0000-800.0000]

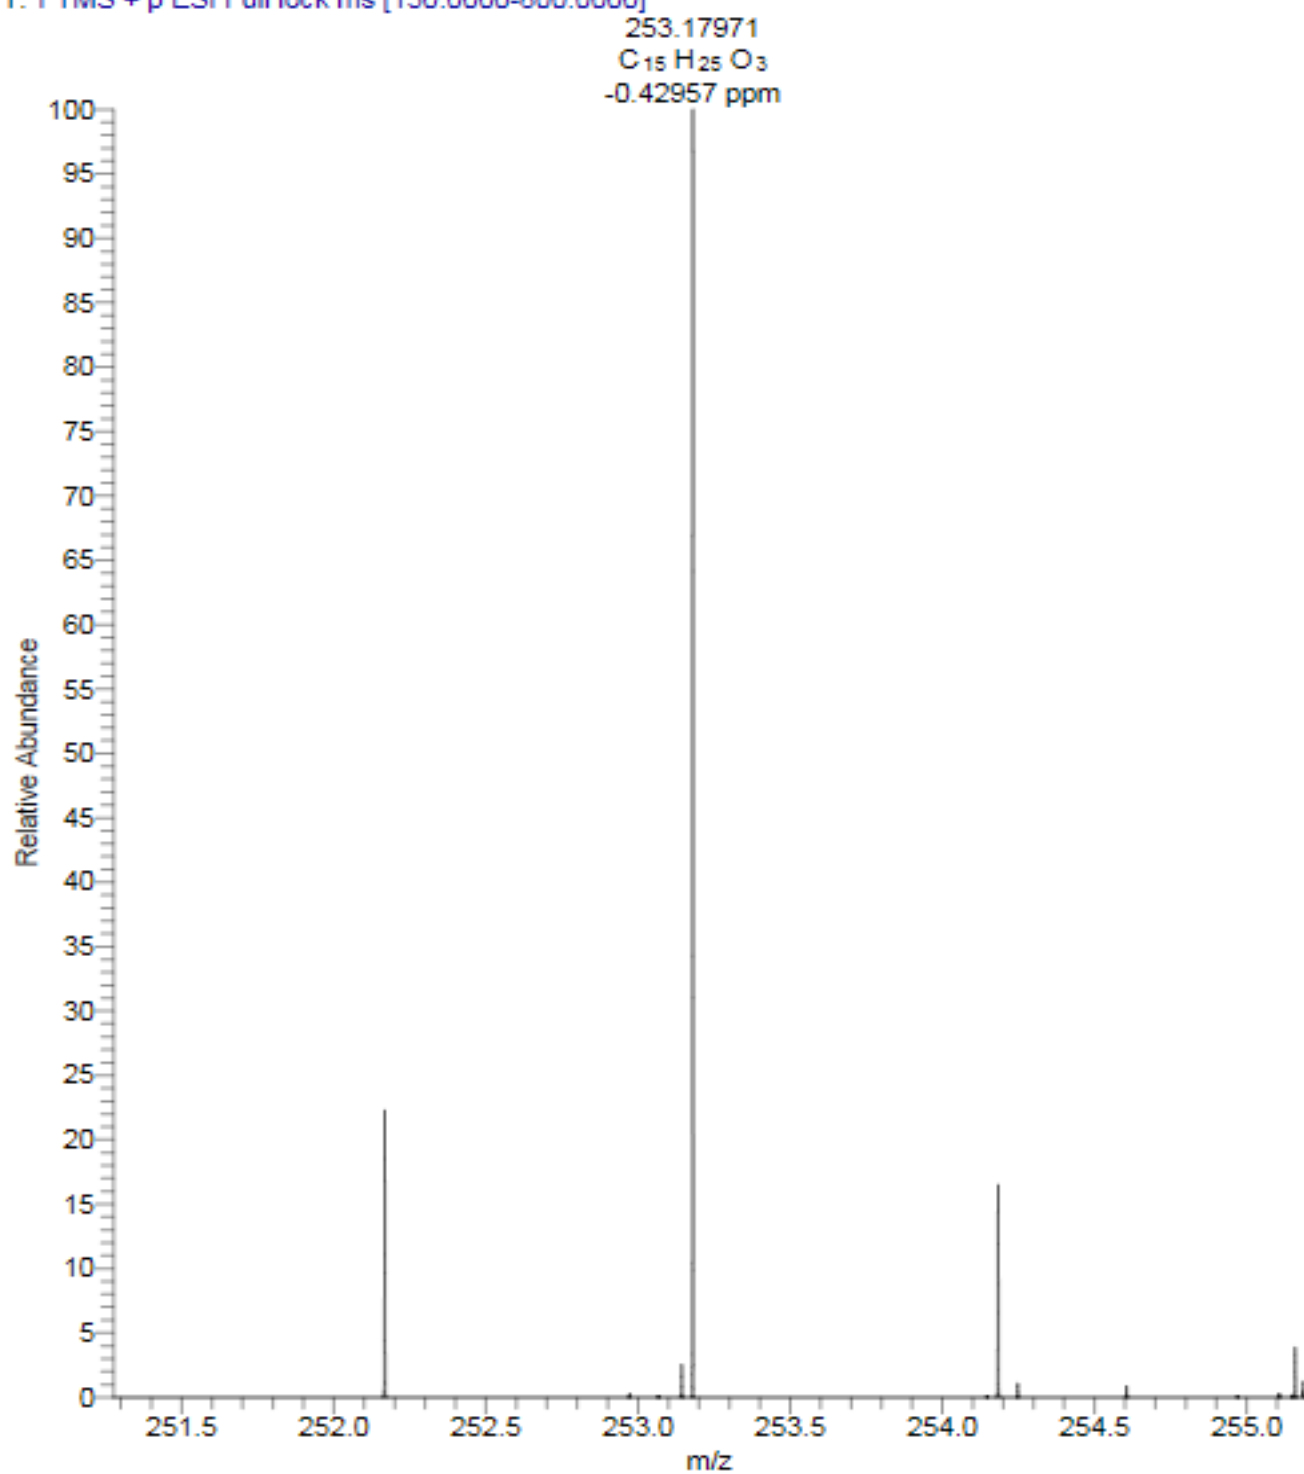

## CD spectra

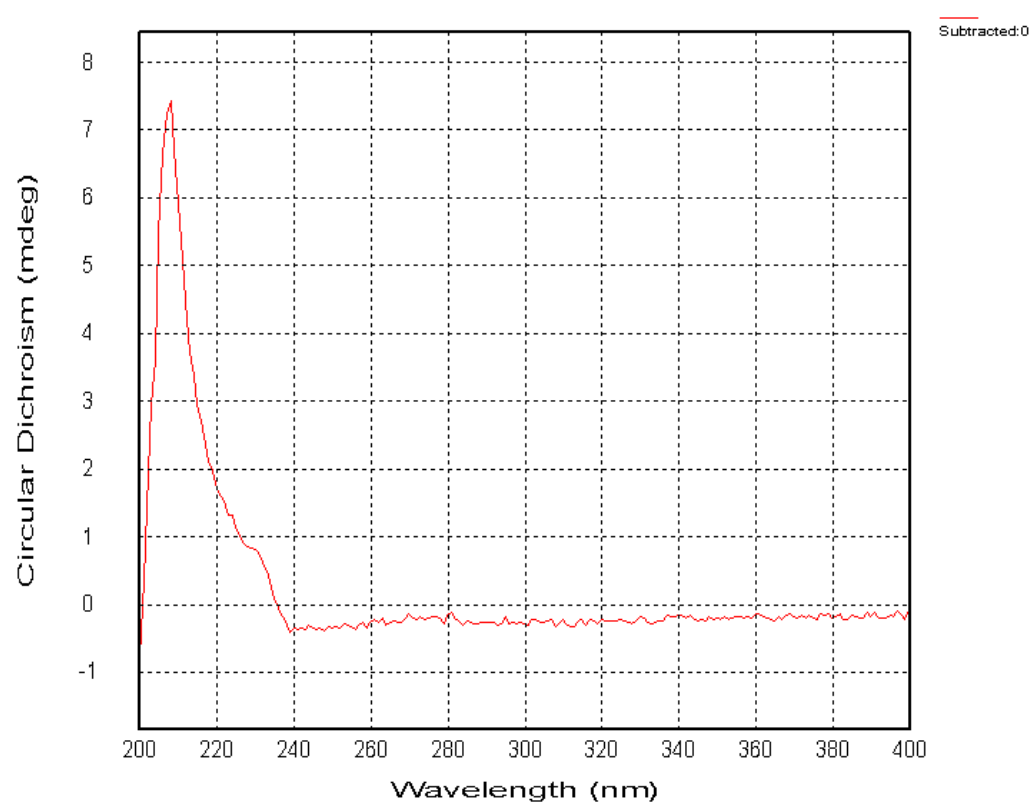

# S1.4 NMR, HRESIMS and CD spectra of bipolarisorokin D (4)

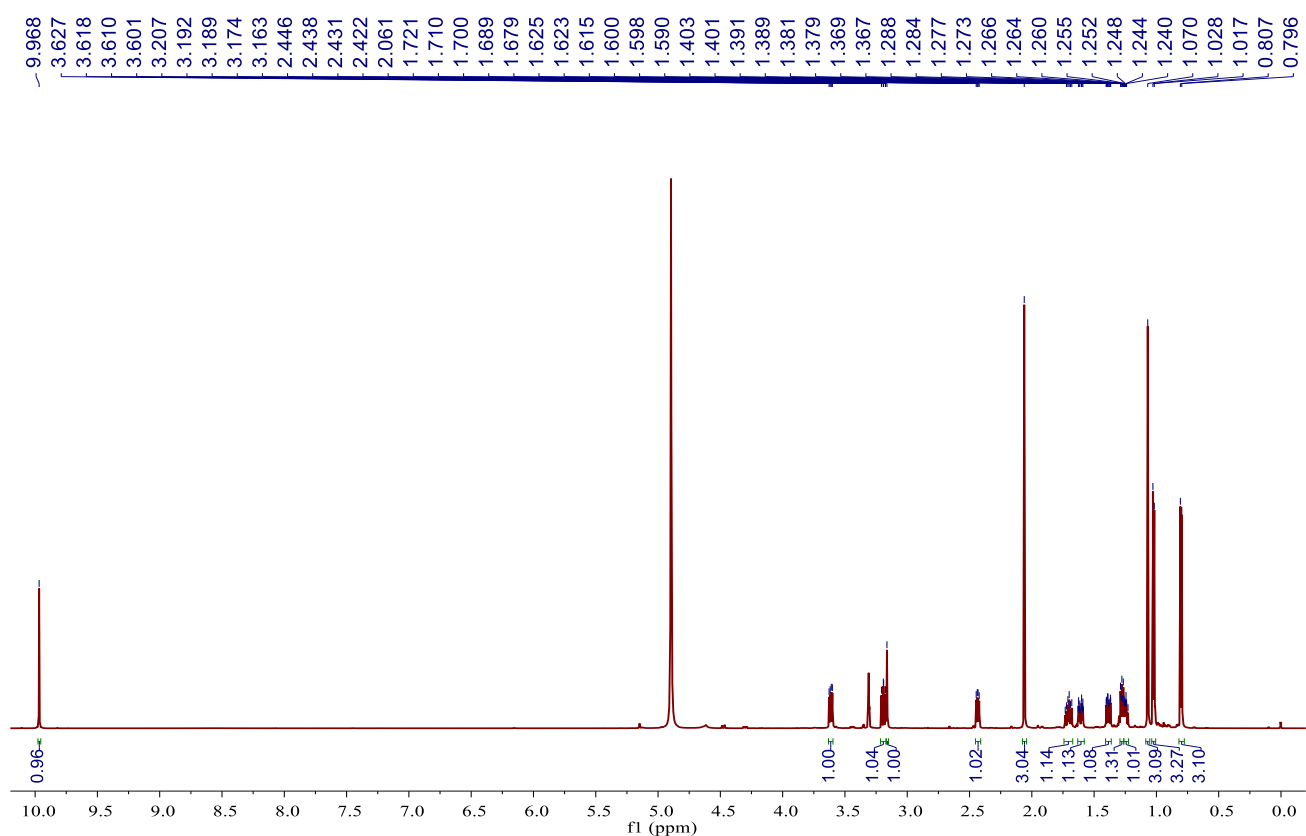

## <sup>13</sup>C NMR and DEPT spectra

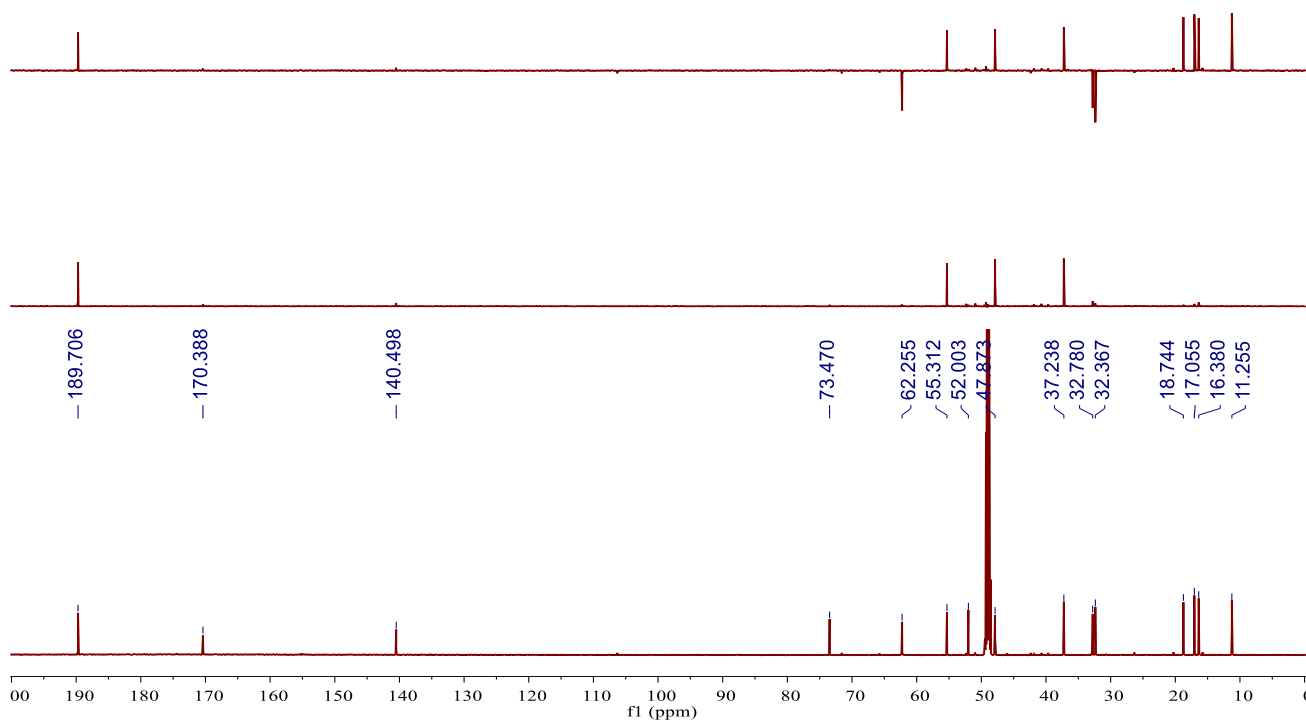

HSQC spectrum

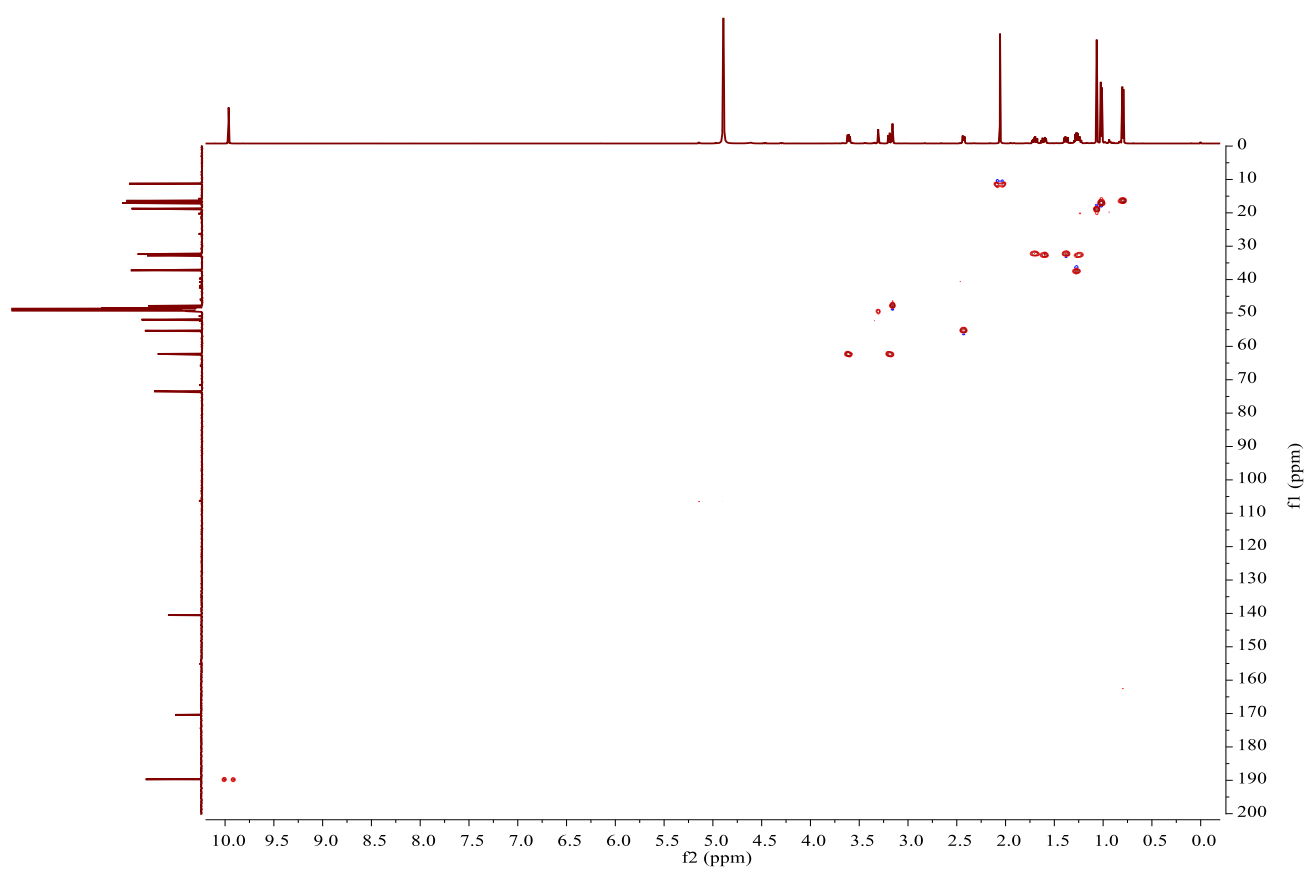

HMBC spectrum

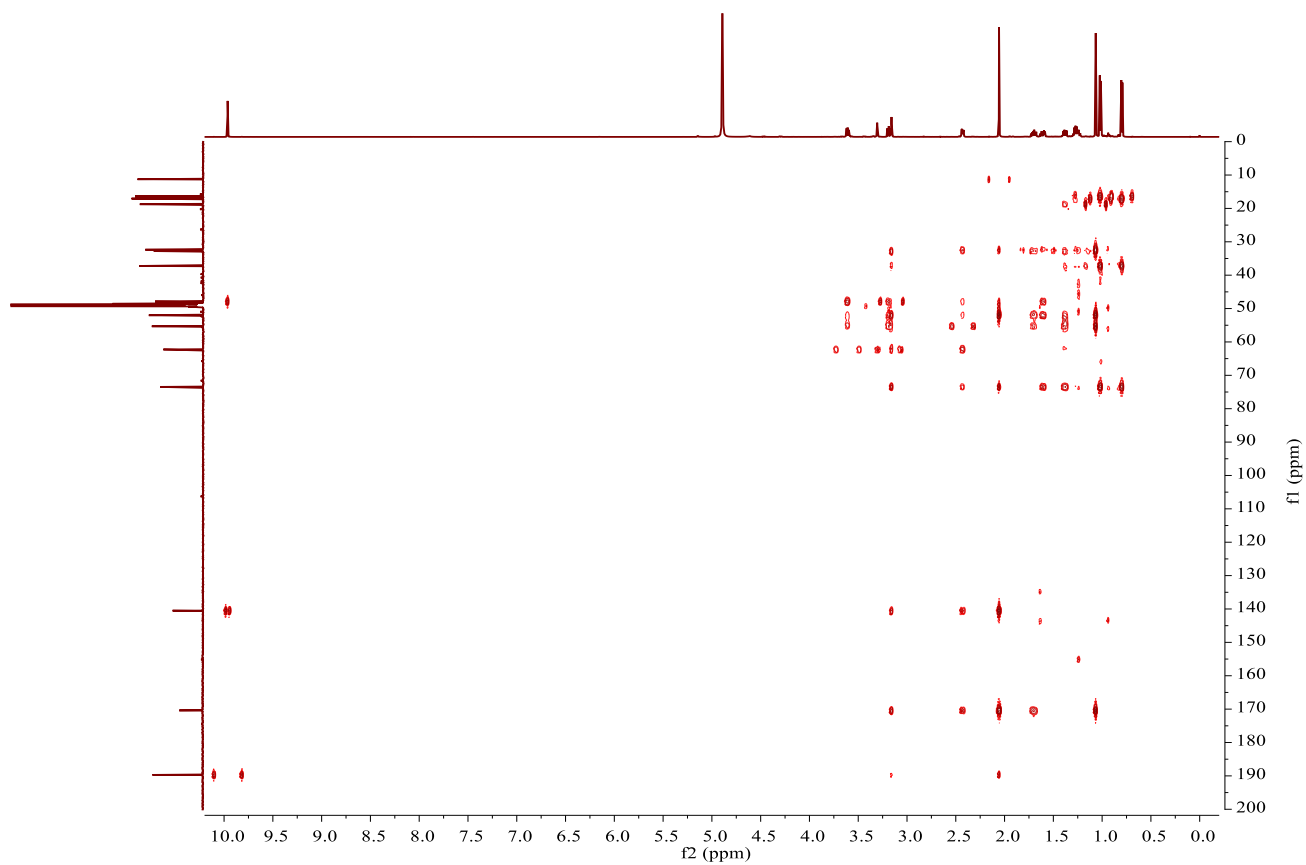

$^1\text{H}$ - $^1\text{H}$  COSY spectrum

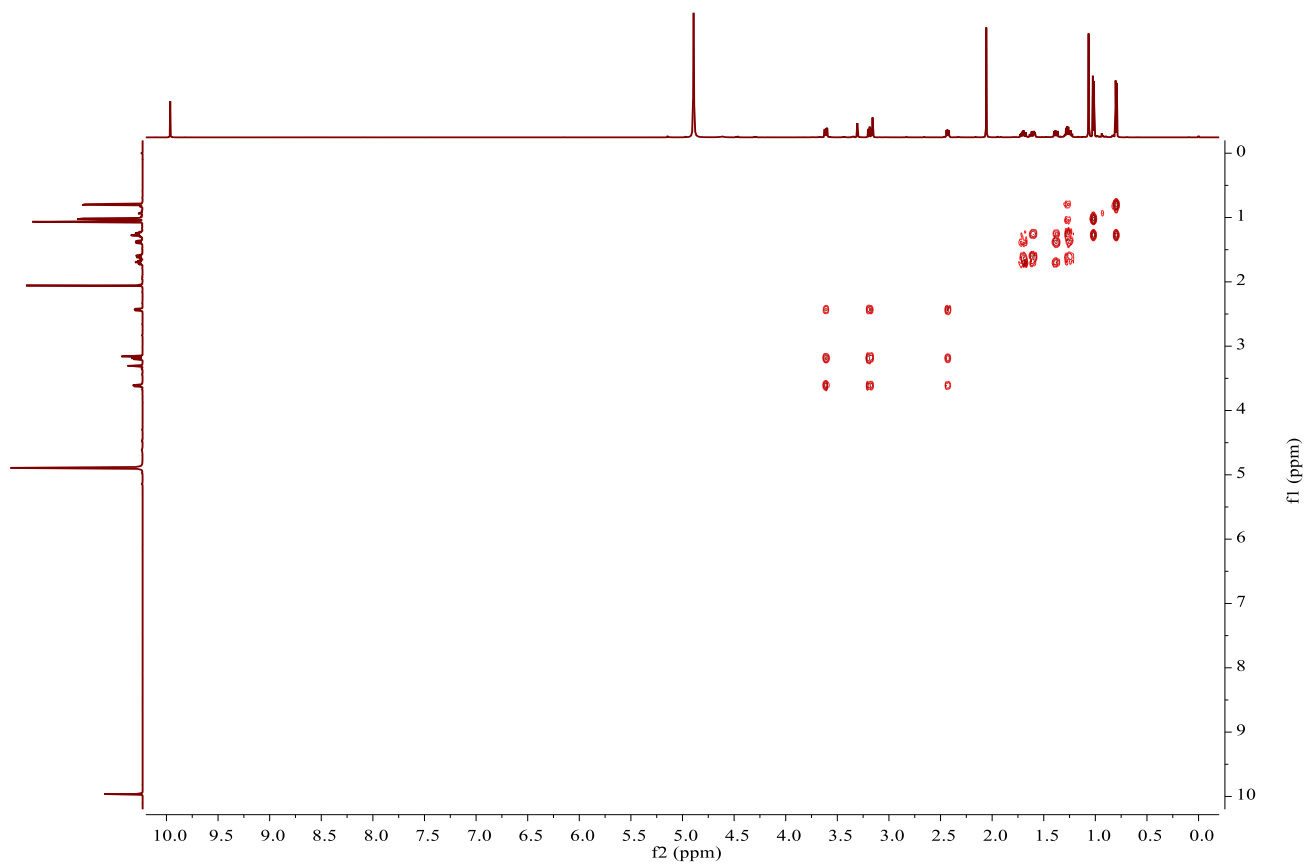



ROESY spectrum

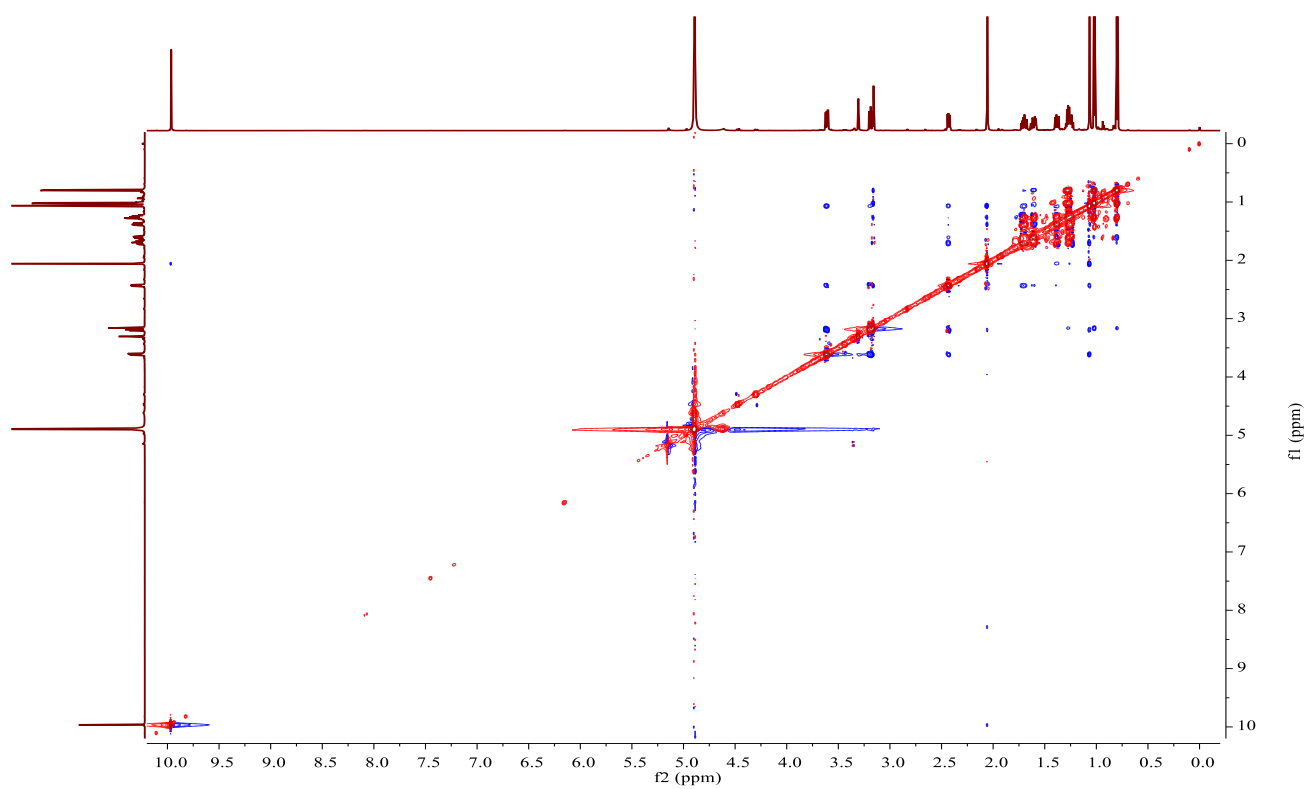

HRESIMS

T: FTMS + p ESI Full lock ms [150.0000-1100.0000]

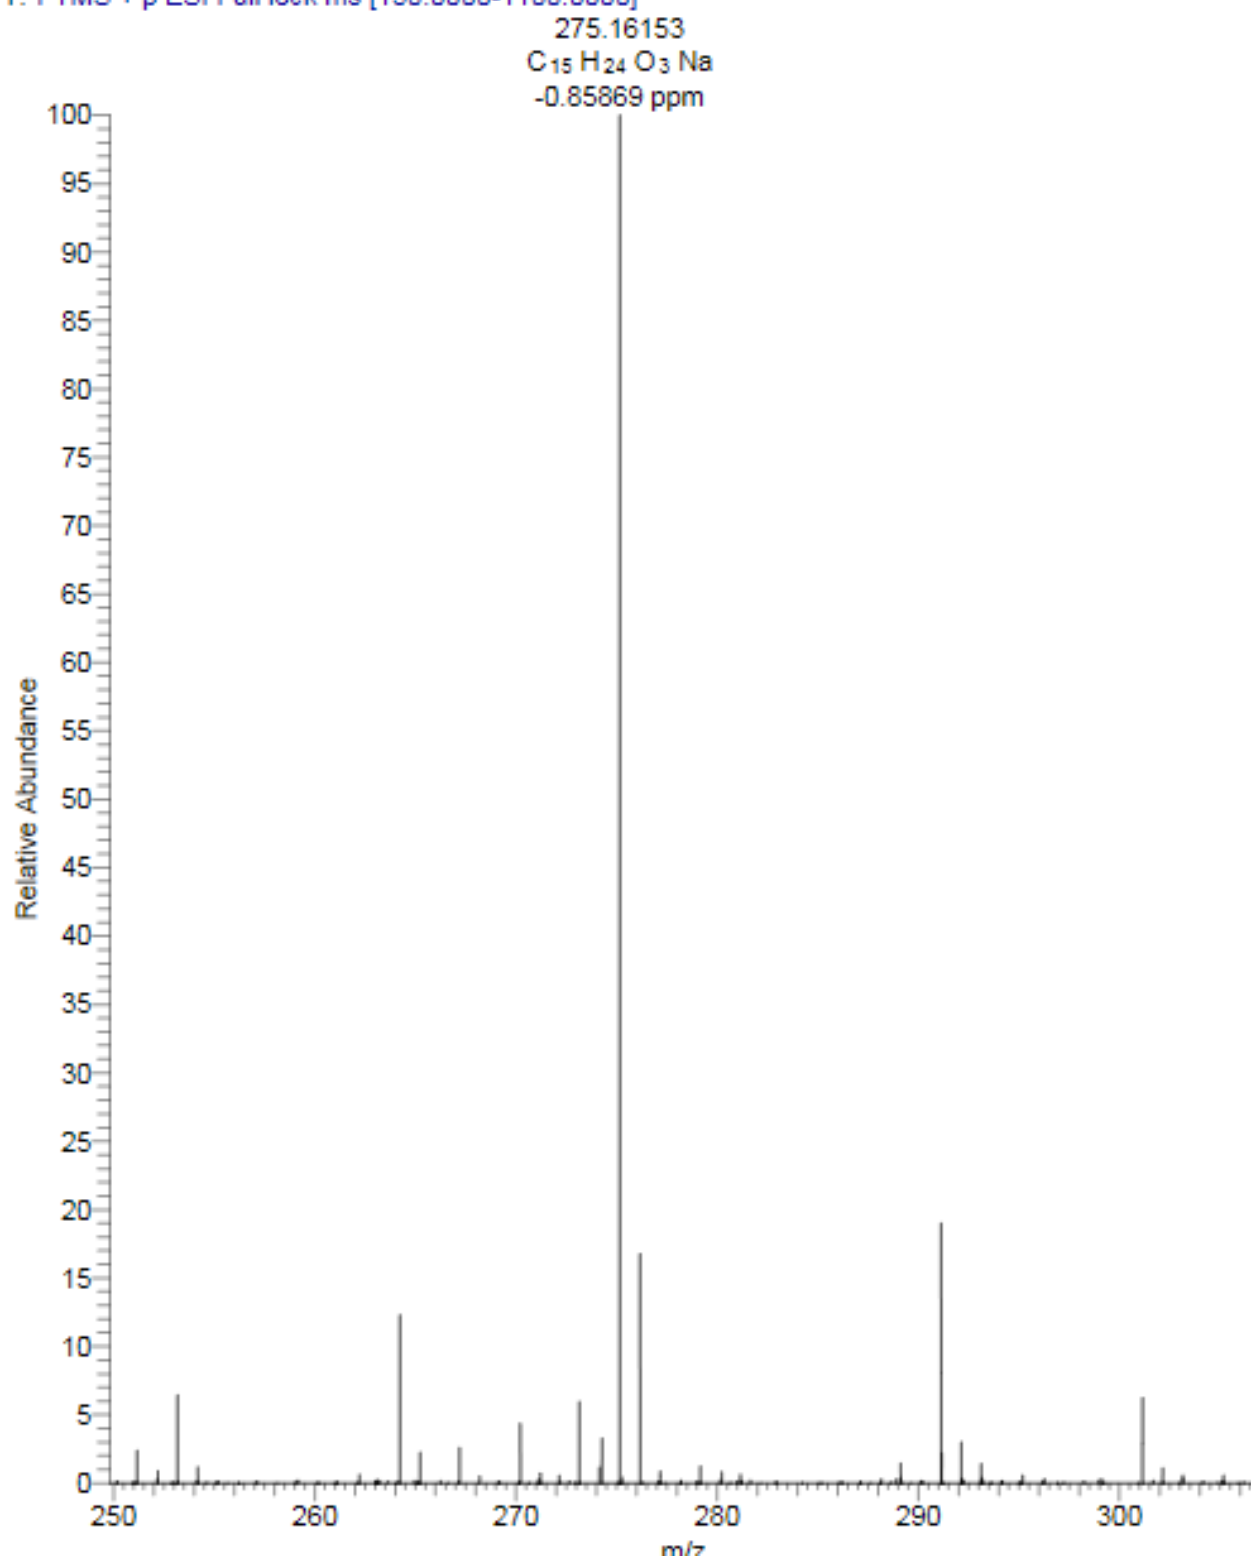

## CD spectra

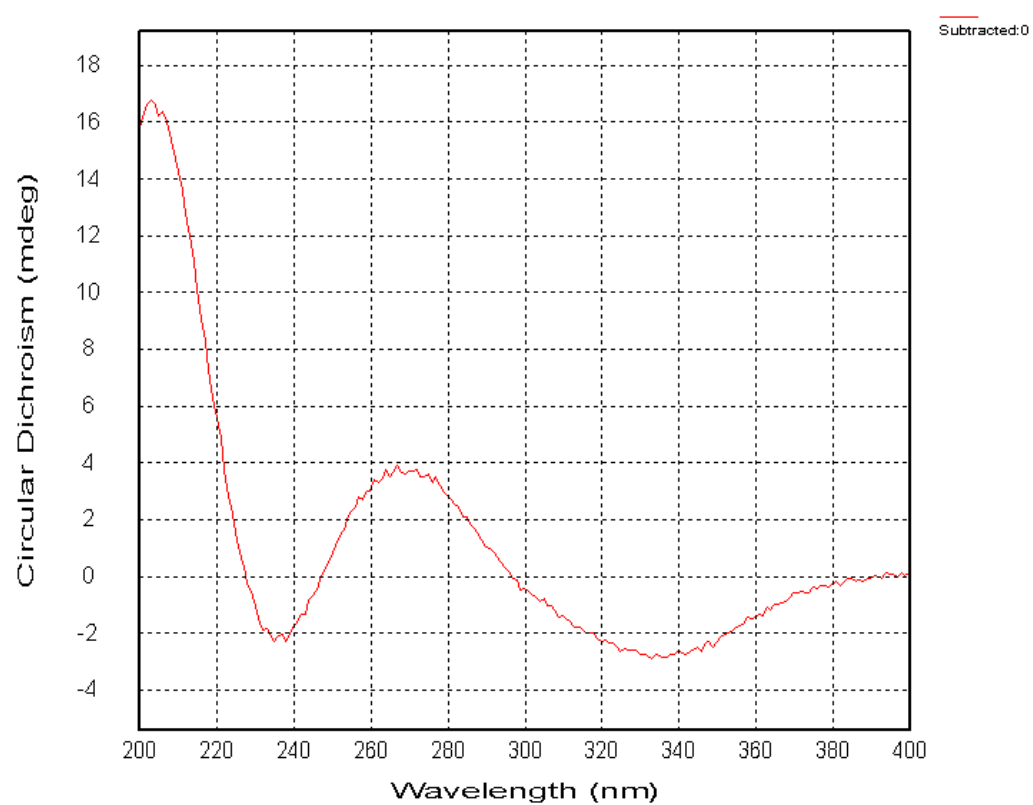

## S1.5 NMR, HRESIMS and CD spectra of bipolarisorokin E (5)

### $^1\text{H}$ NMR spectrum

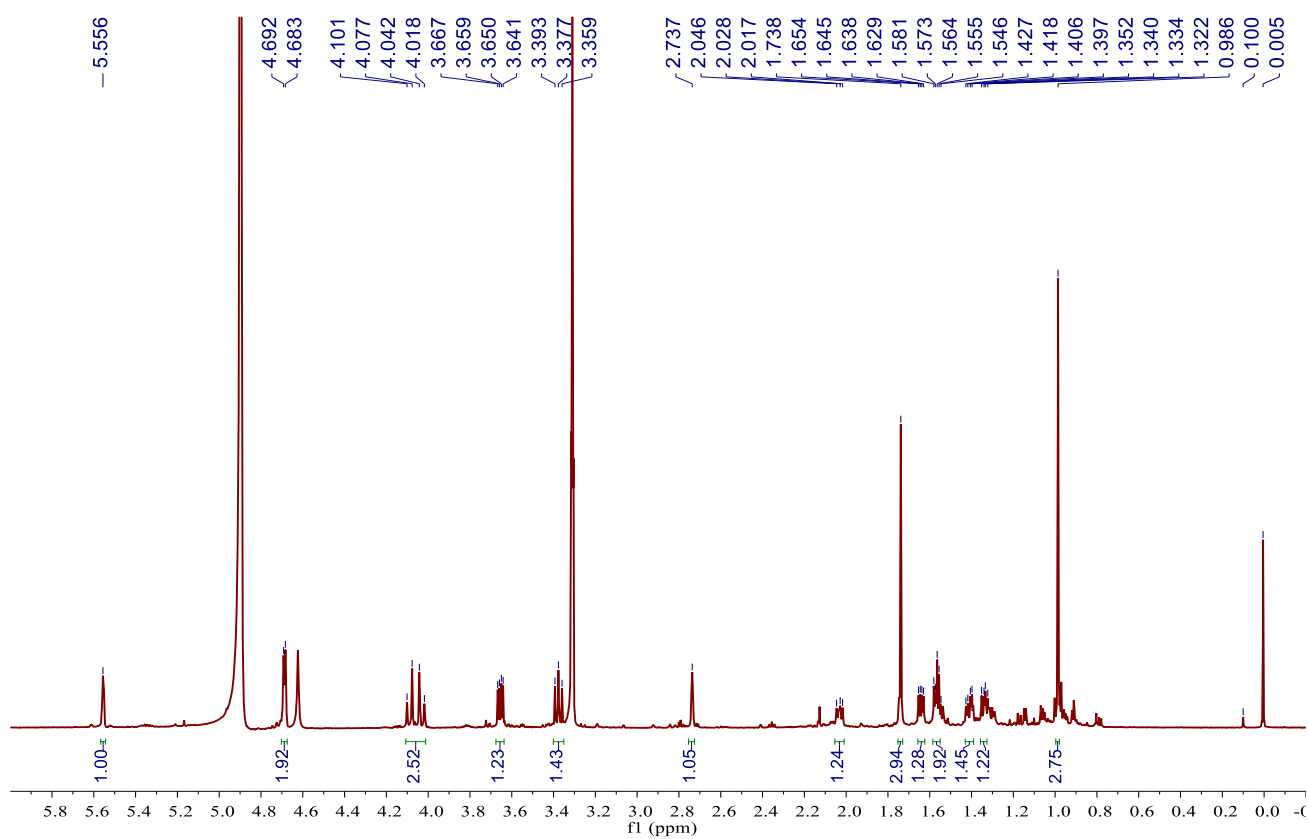

### $^{13}\text{C}$ NMR and DEPT spectra

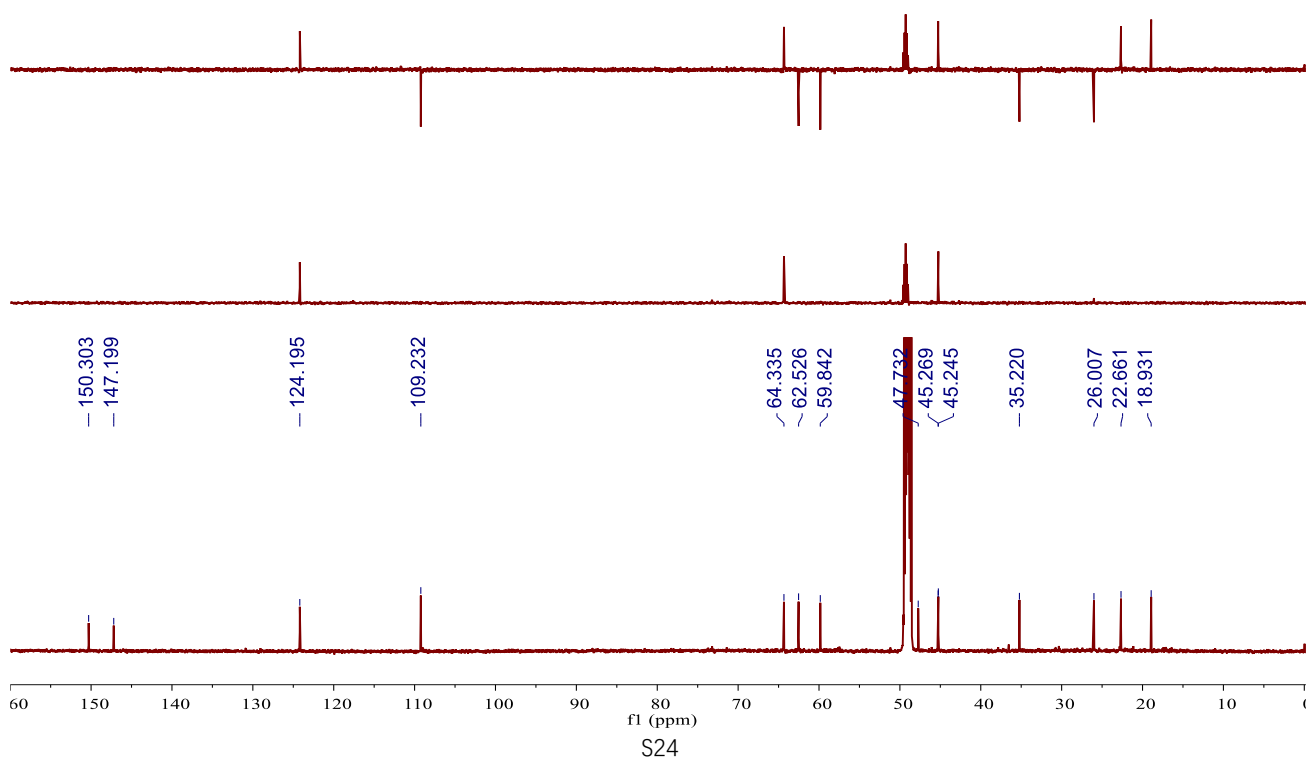

HSQC spectrum

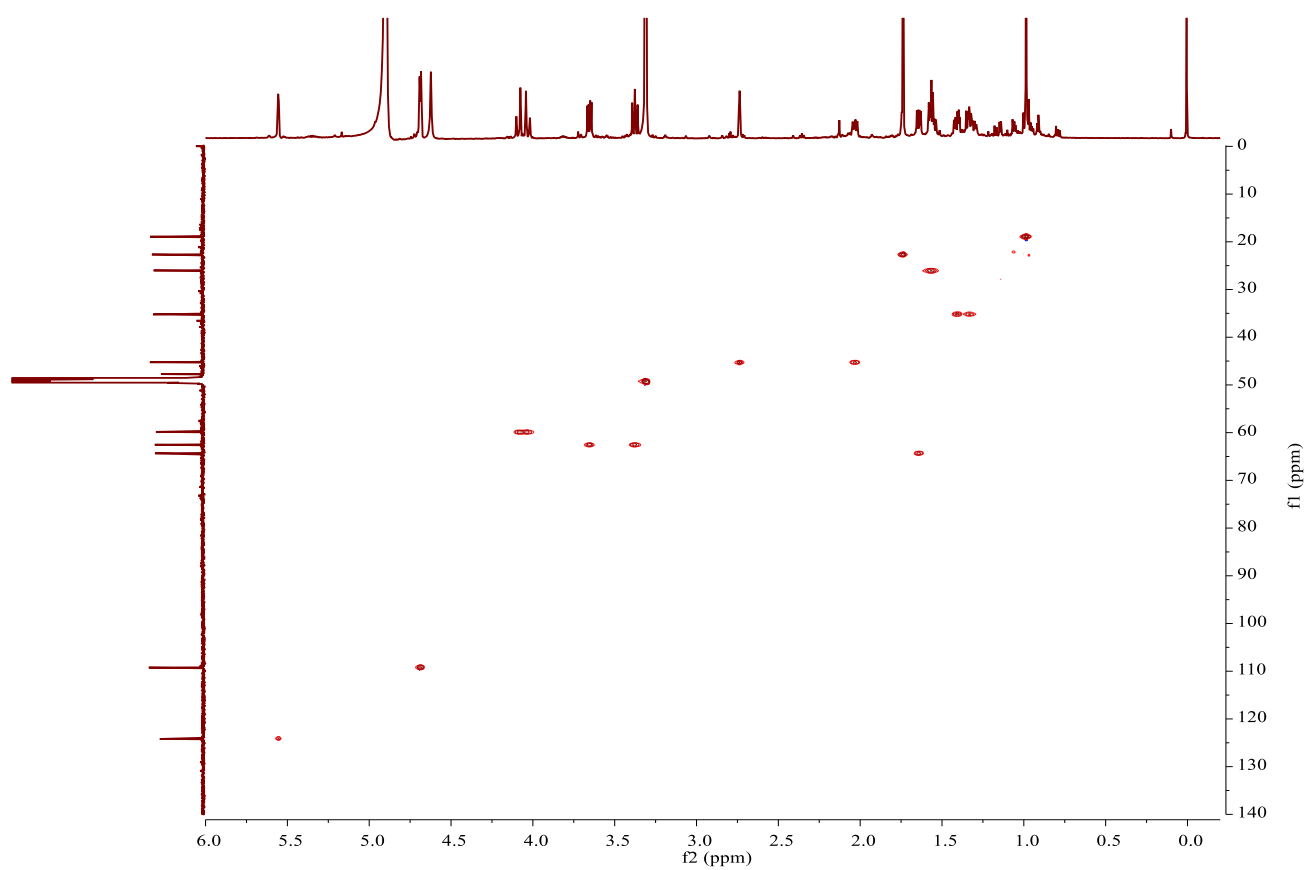

HMBC spectrum

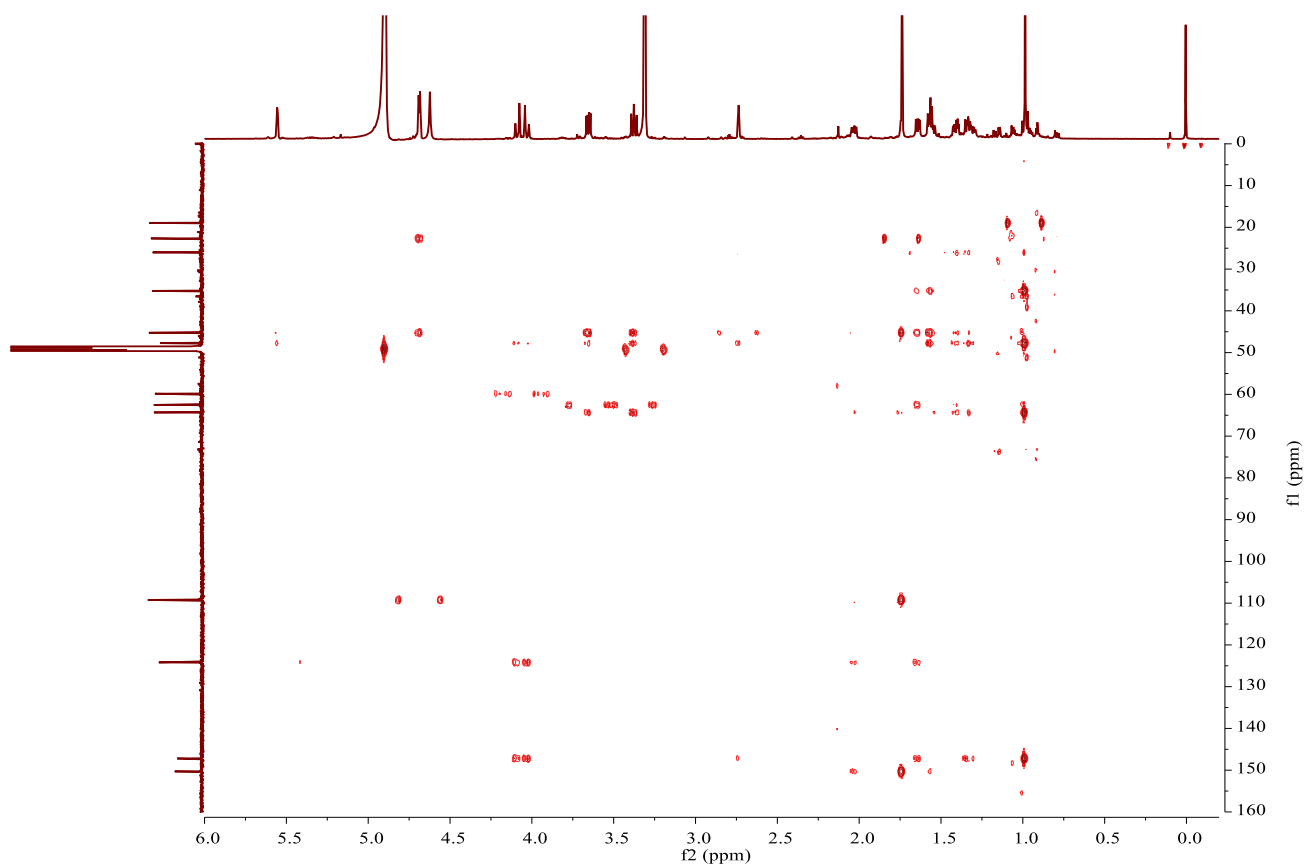

$^1\text{H}$ - $^1\text{H}$  COSY spectrum

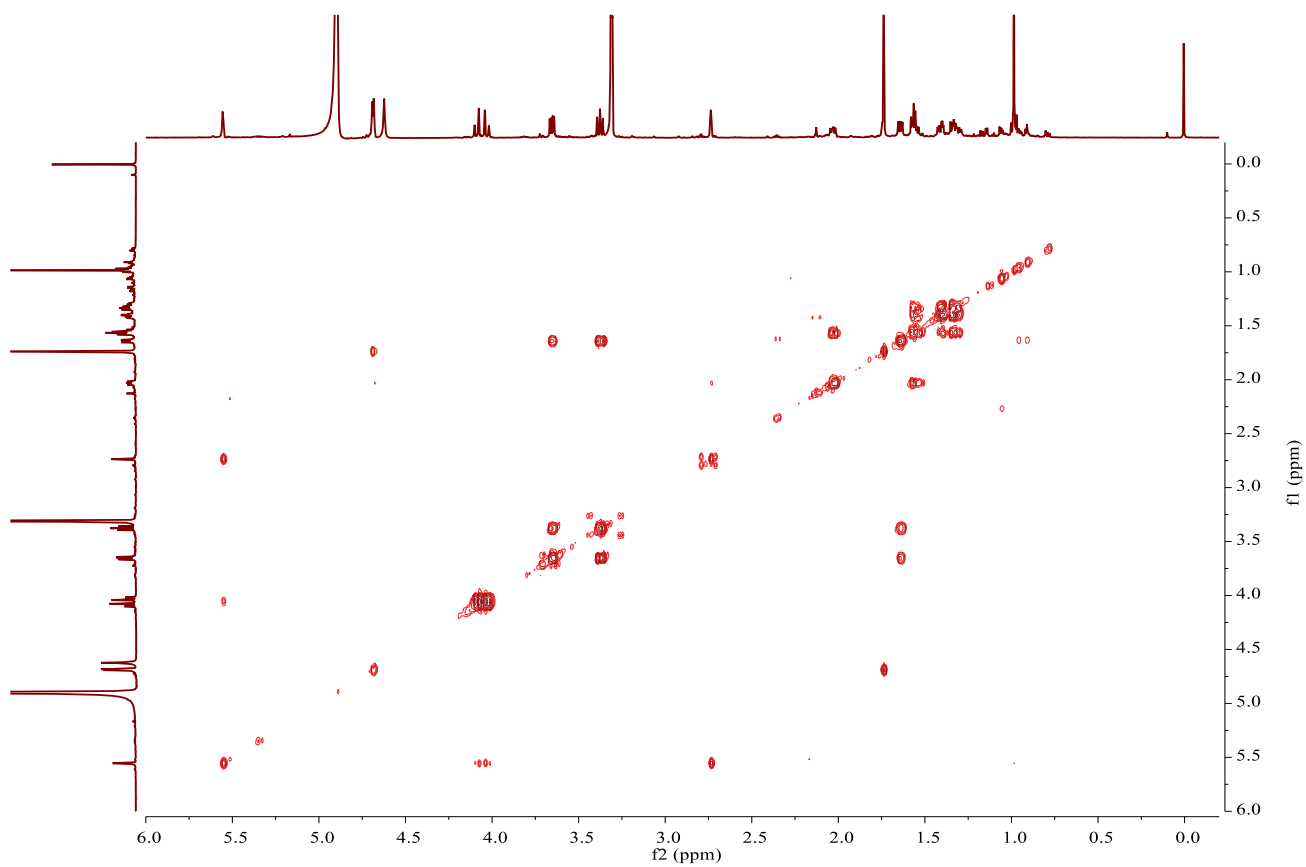

ROESY spectrum

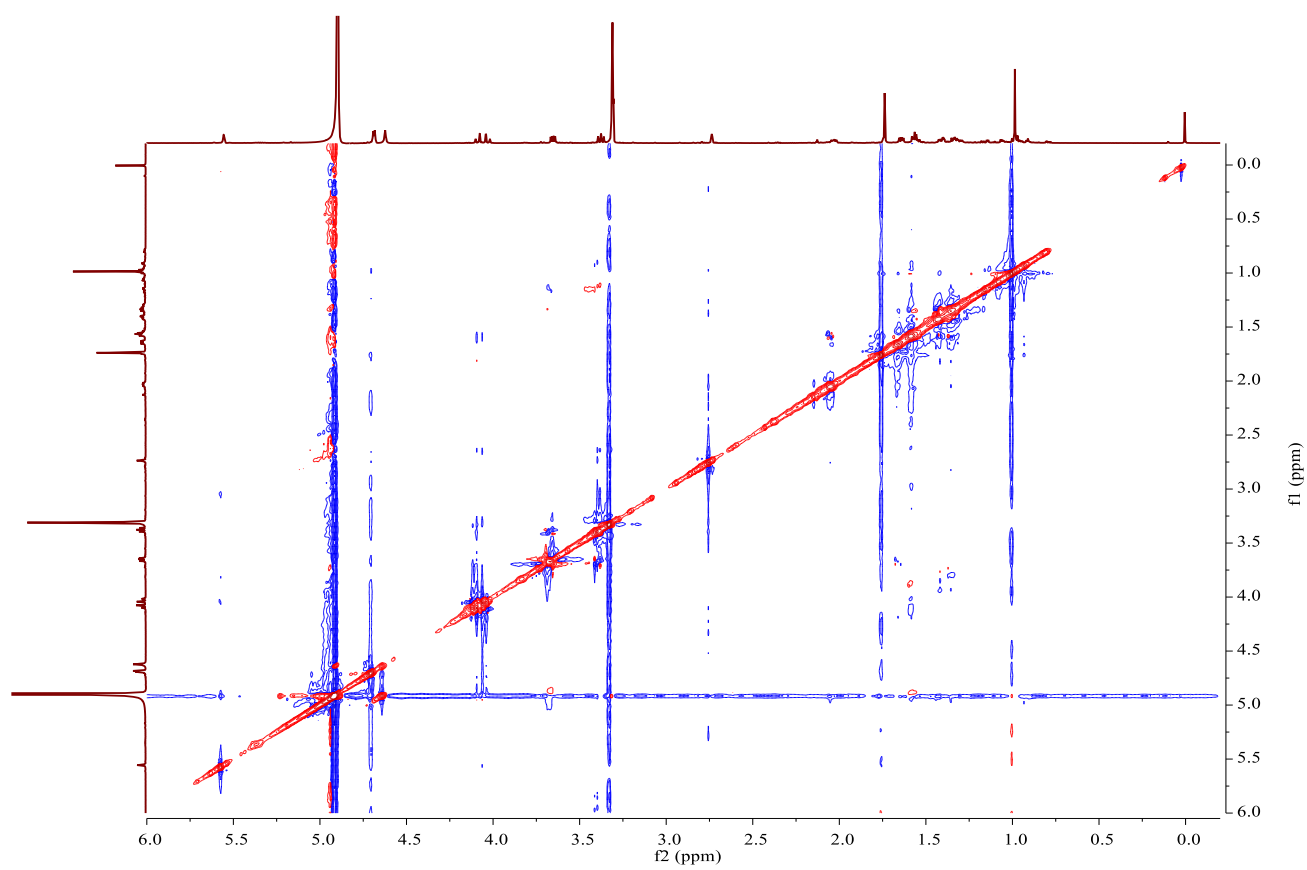

HRESIMS

f: FTMS - p ESI Full lock ms [150.0000-800.0000]

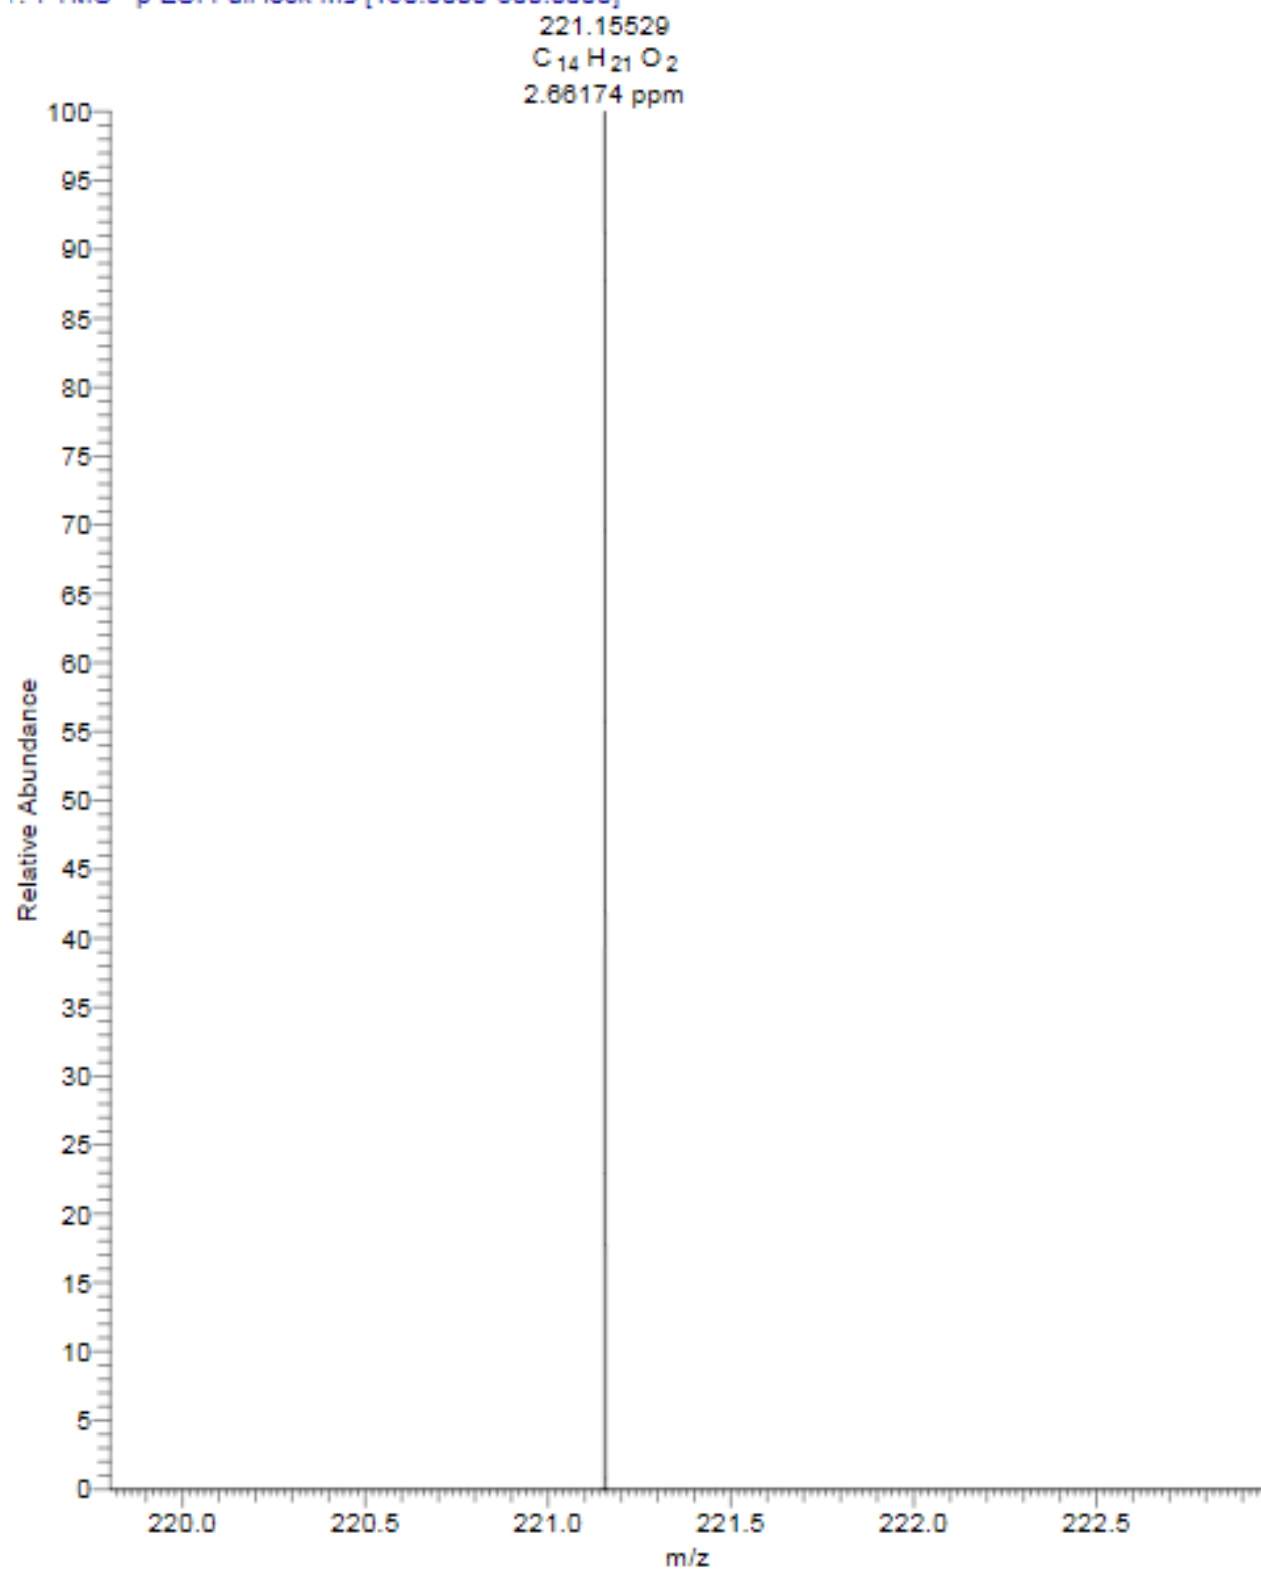



## CD spectra

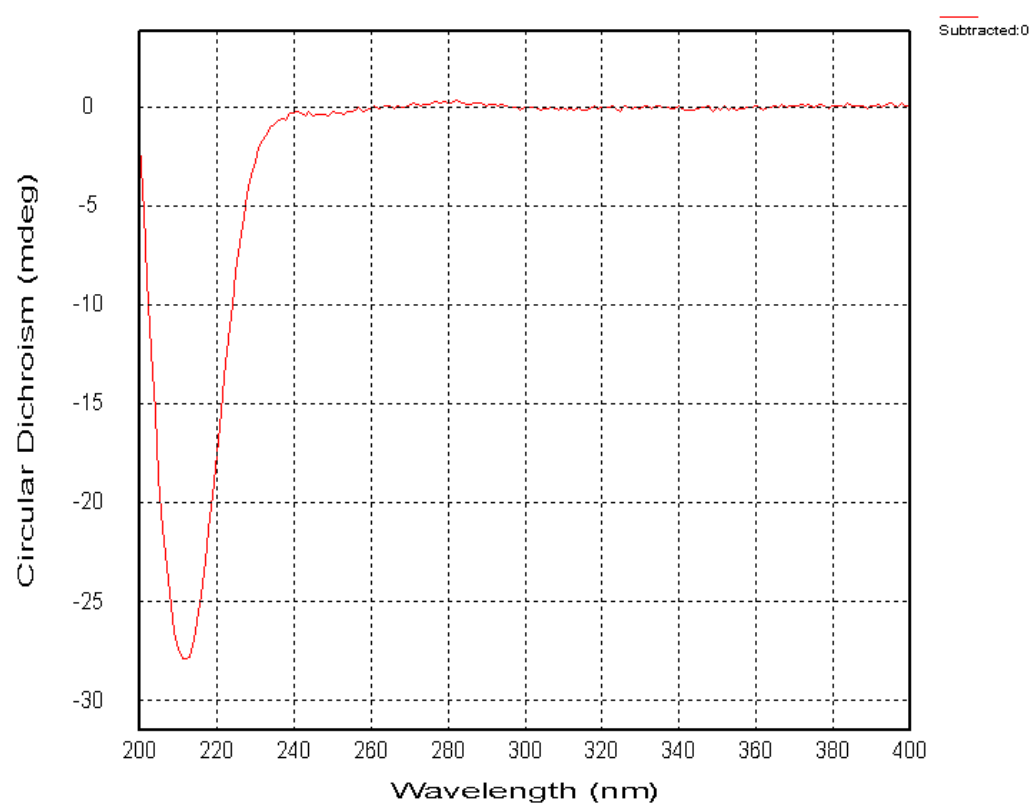

## S1.6 NMR and HRESIMS spectra of bipolarisorokin F (6)

### $^1\text{H}$ NMR spectrum

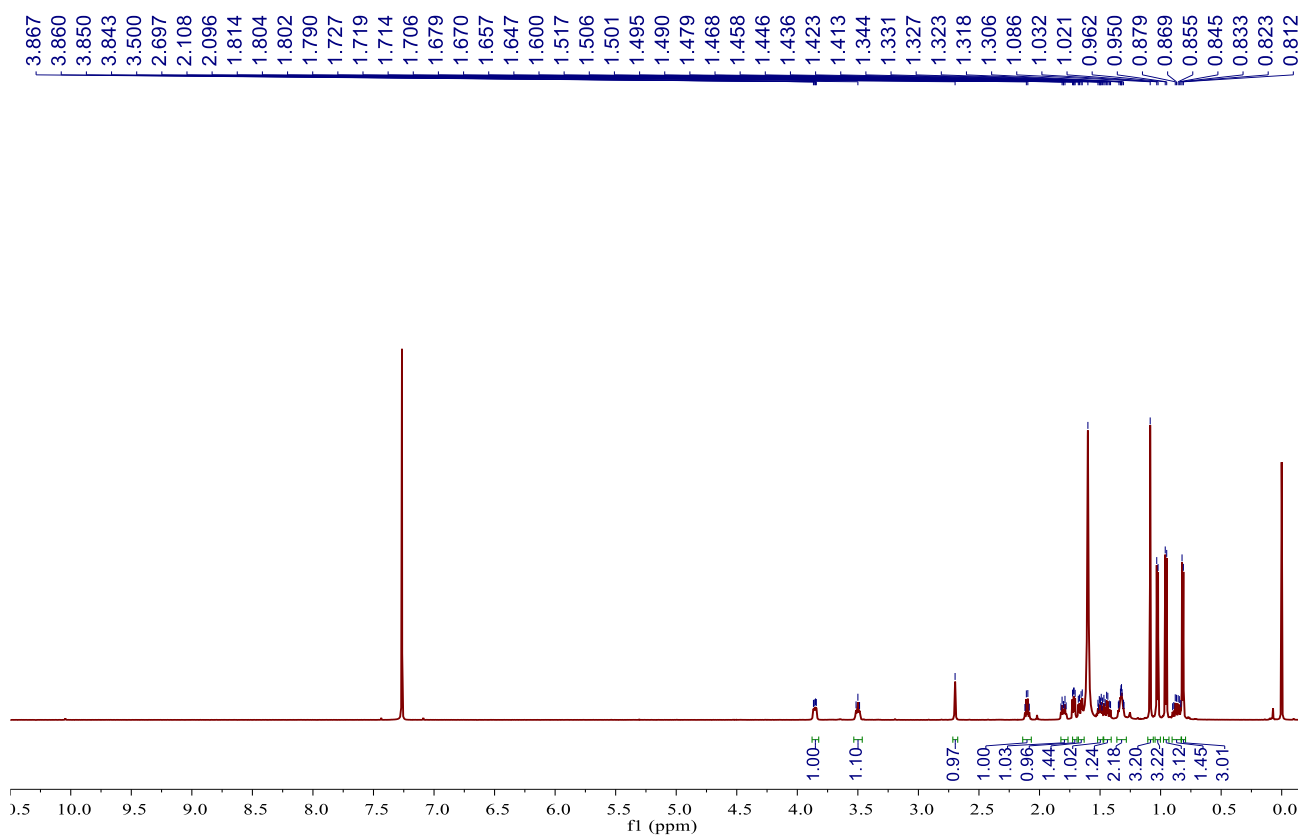

### $^{13}\text{C}$ NMR and DEPT spectra

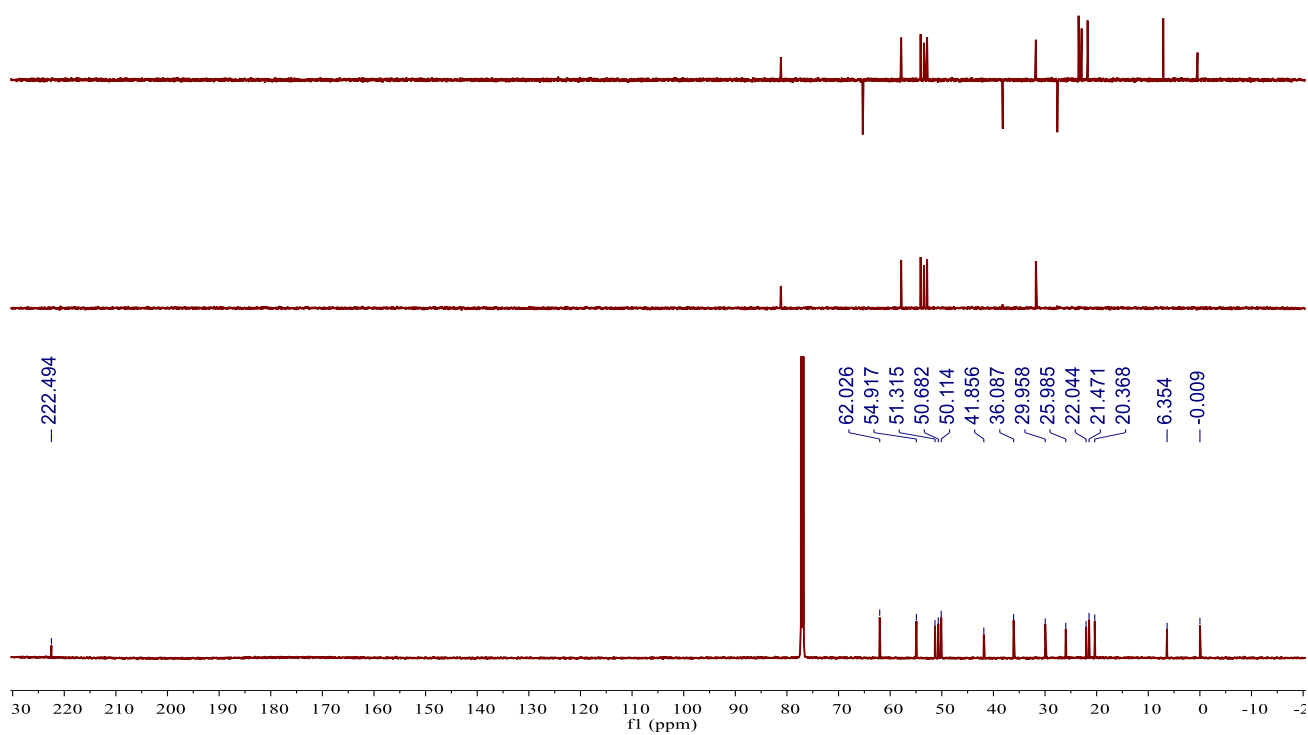

HSQC spectrum

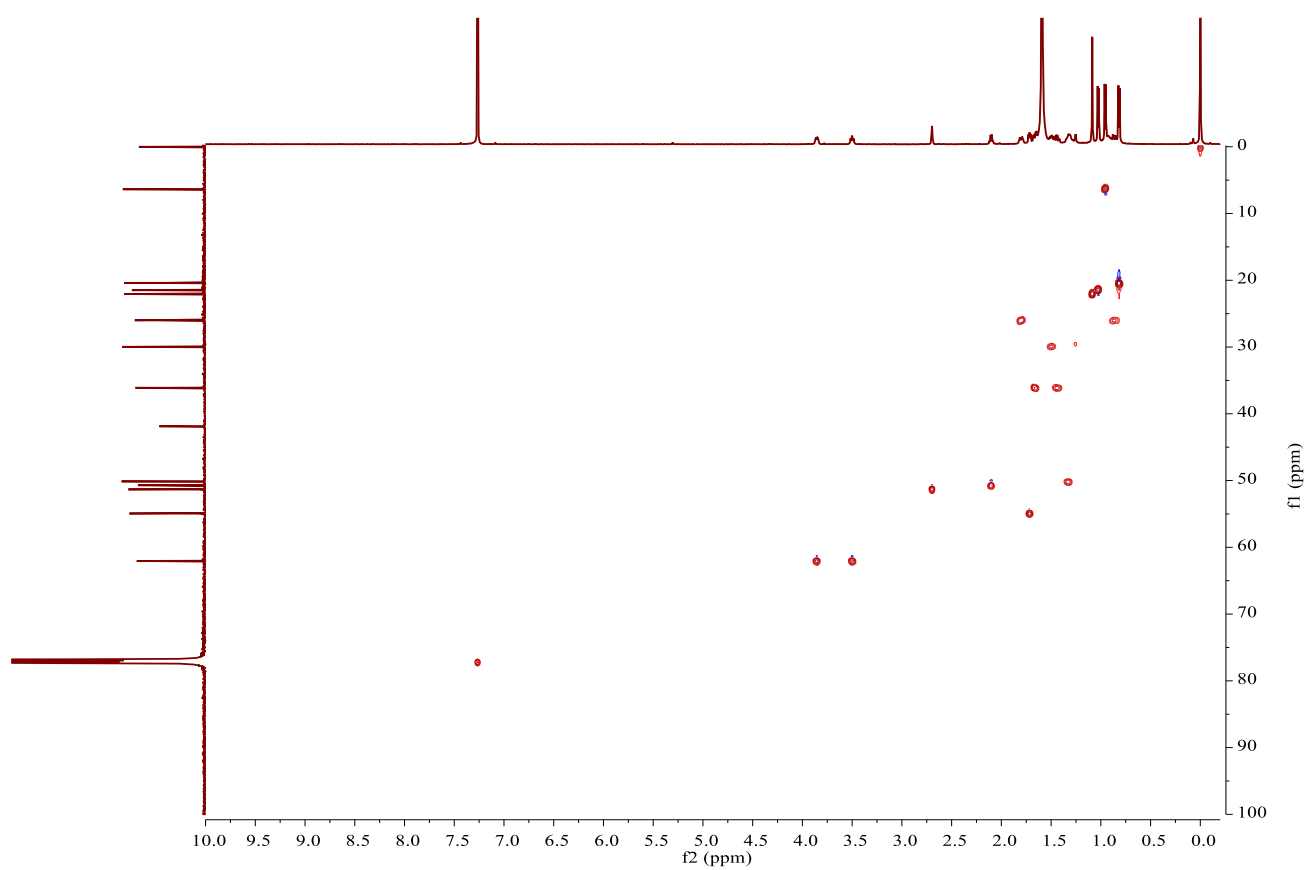

HMBC spectrum

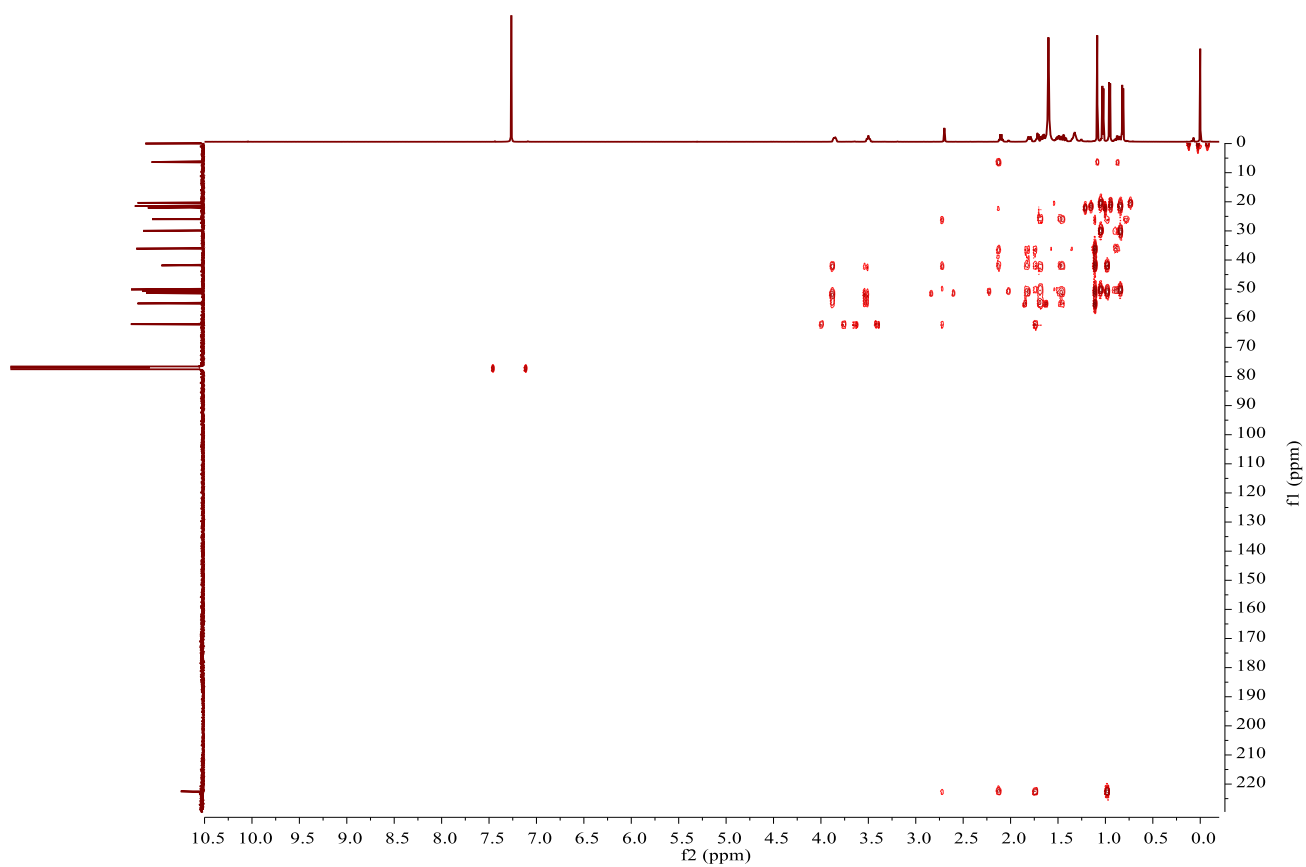

$^1\text{H}$ - $^1\text{H}$  COSY spectrum

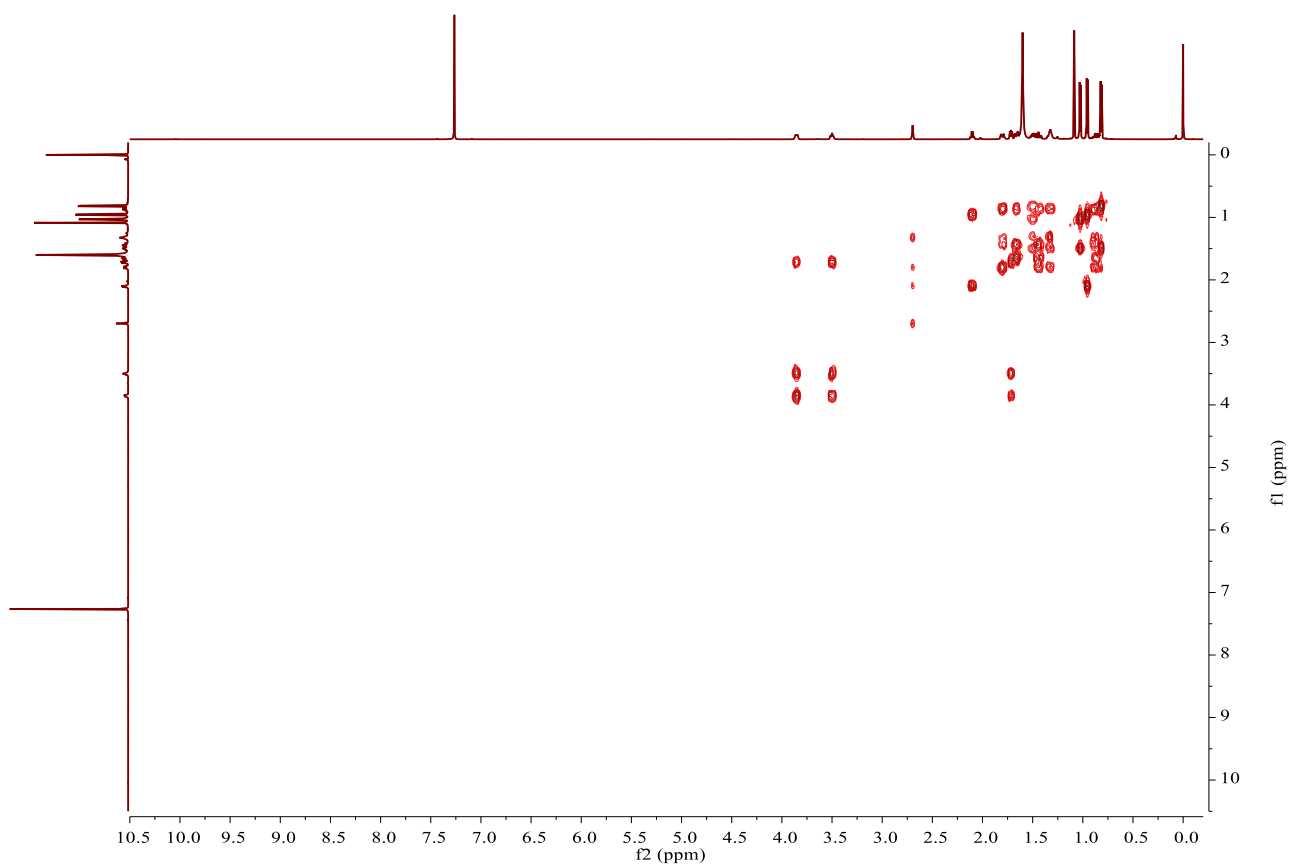

ROESY spectrum

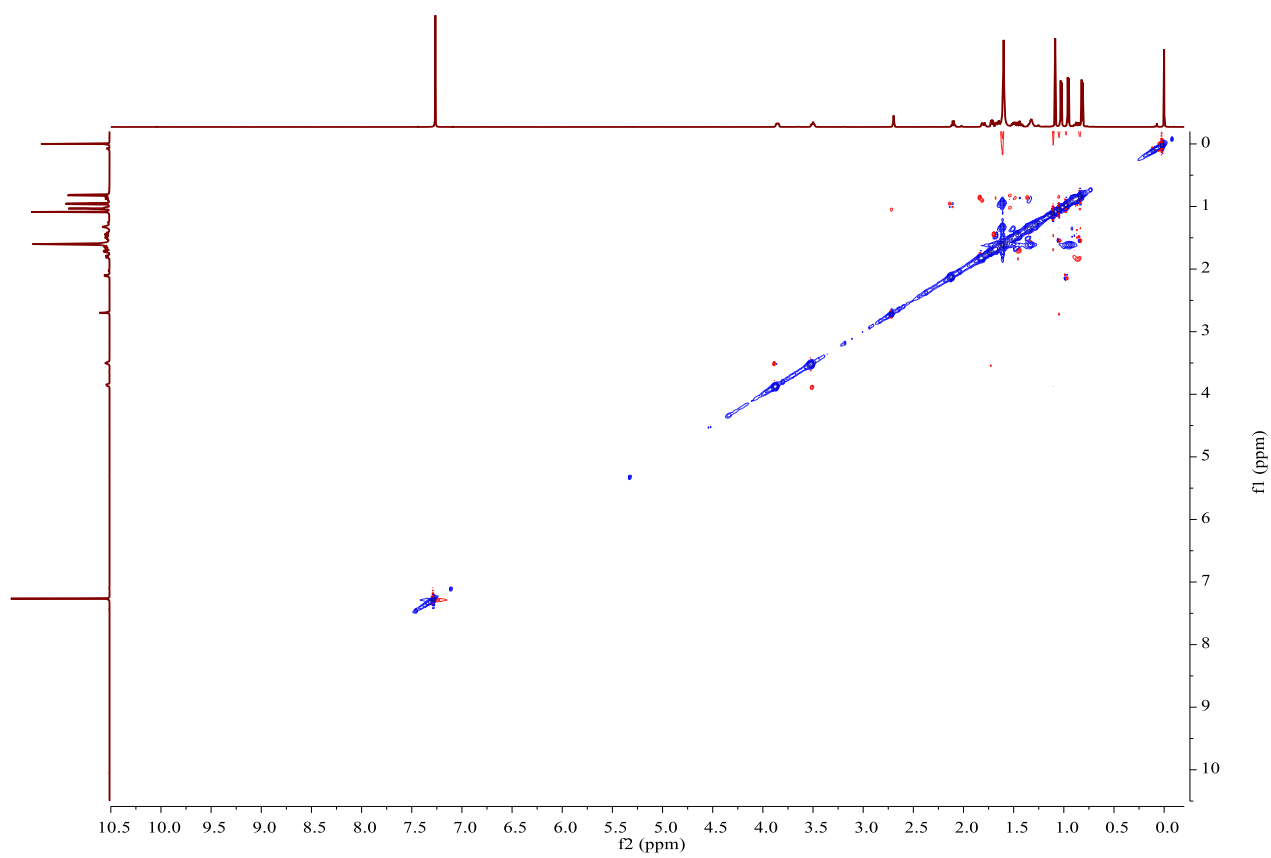

HRESIMS

T: FTMS + p ESI Full lock ms [100.0000-900.0000]

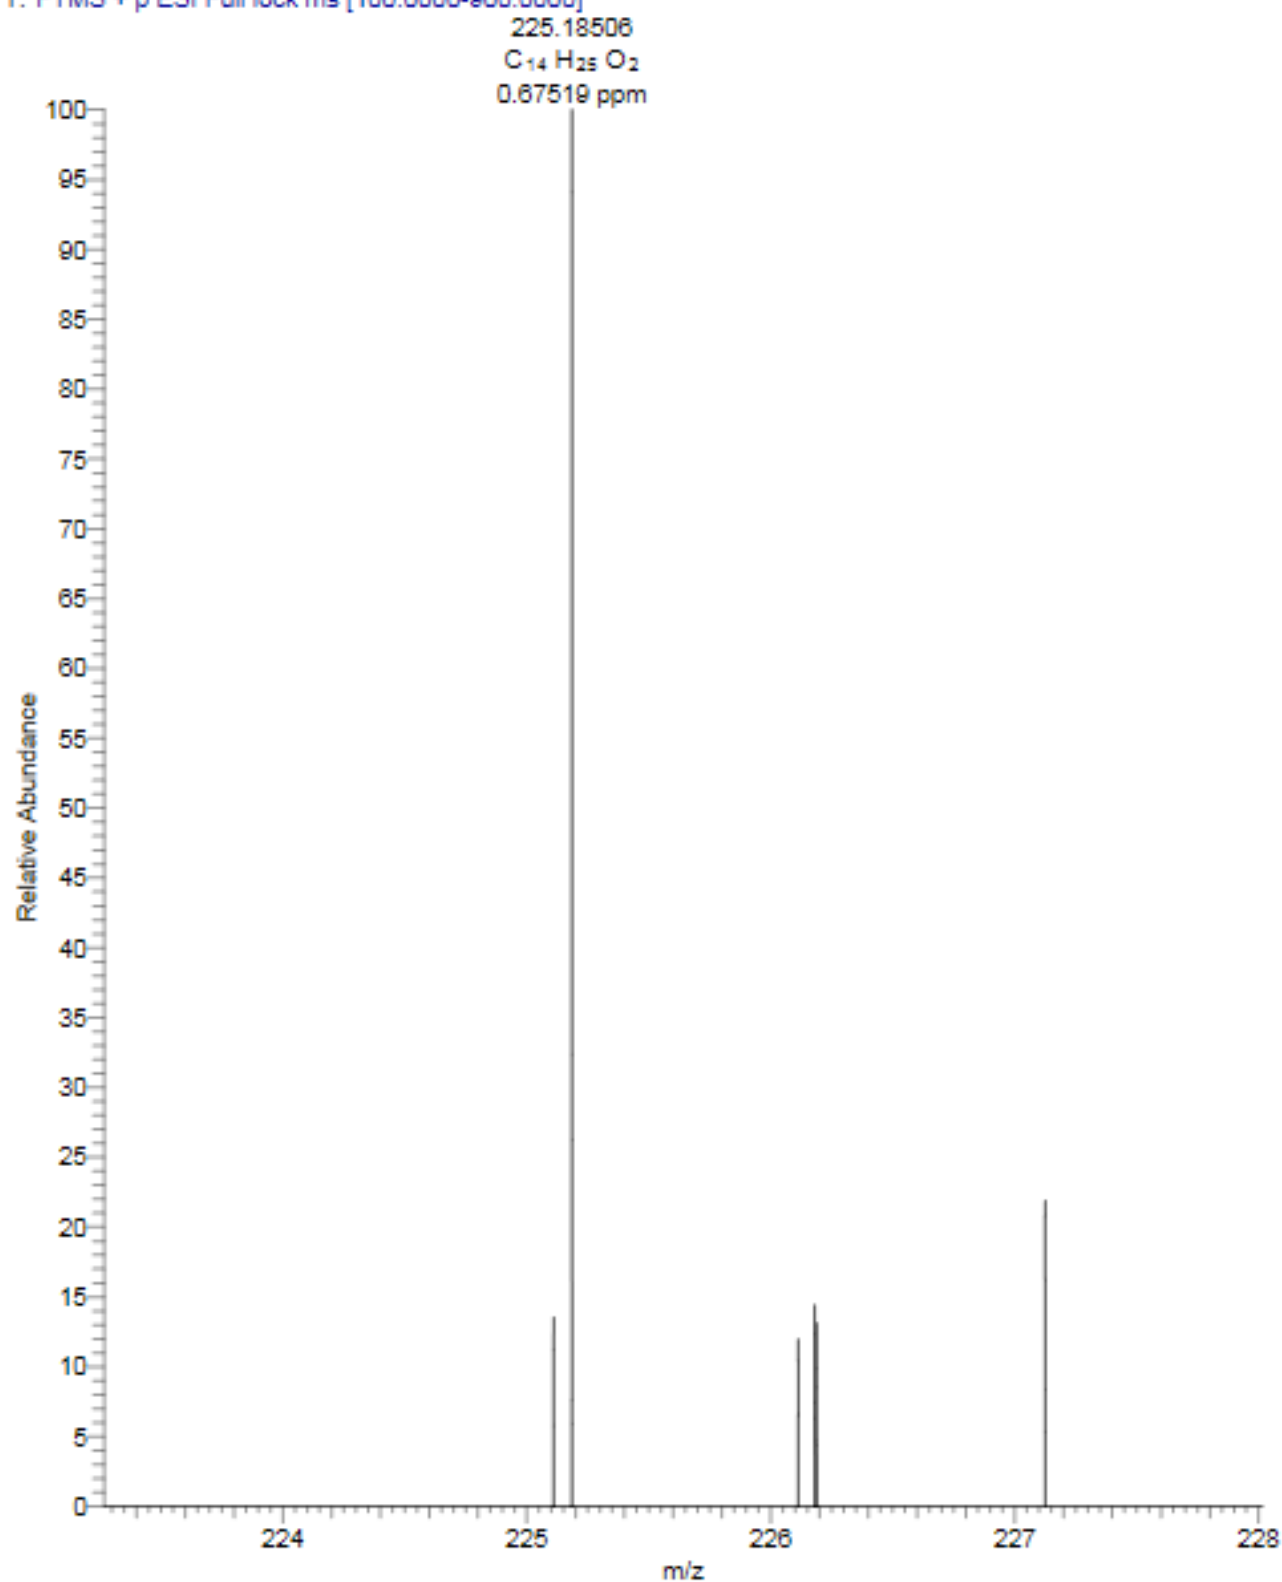

## S1.7 NMR, HRESIMS and CD spectra of bipolarisorokin G (7)

$^1\text{H}$  NMR spectrum

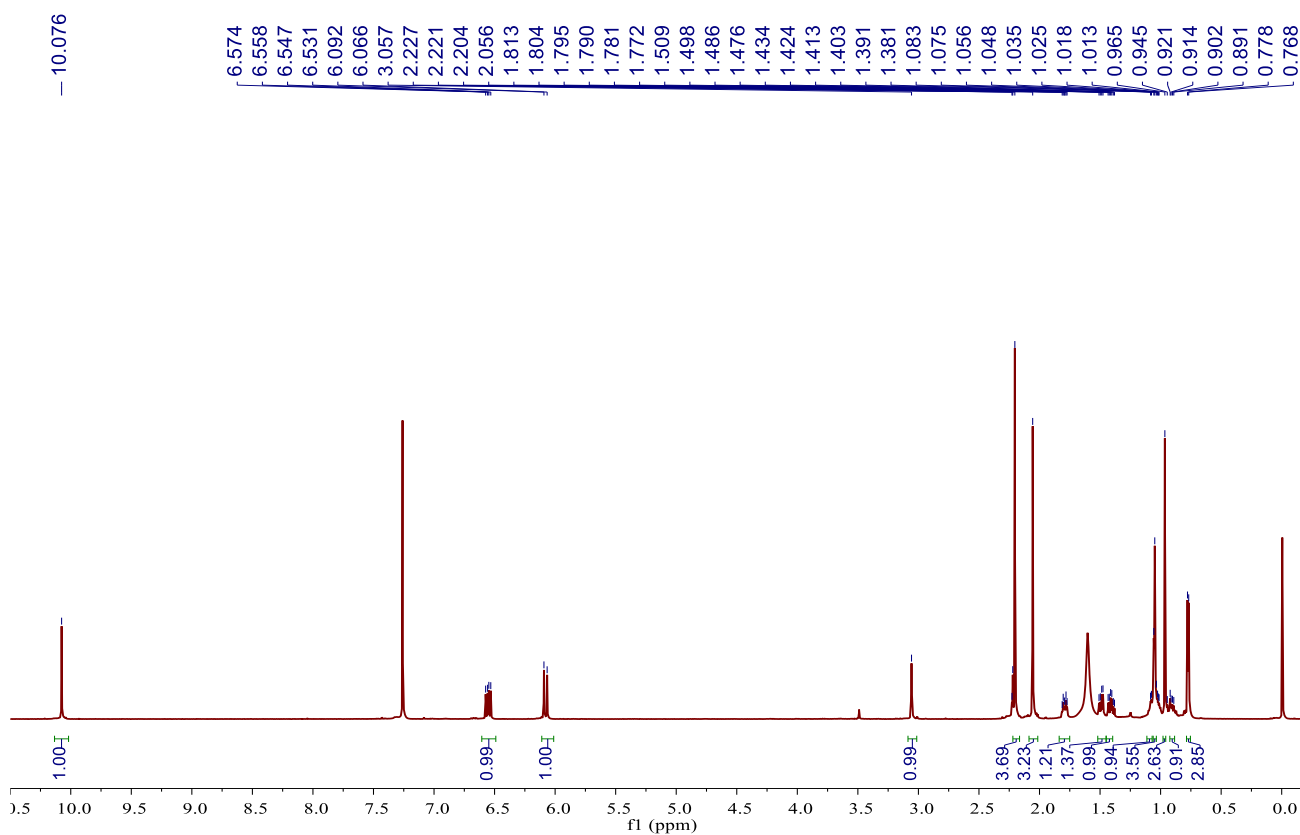

$^{13}\text{C}$  NMR and DEPT spectra

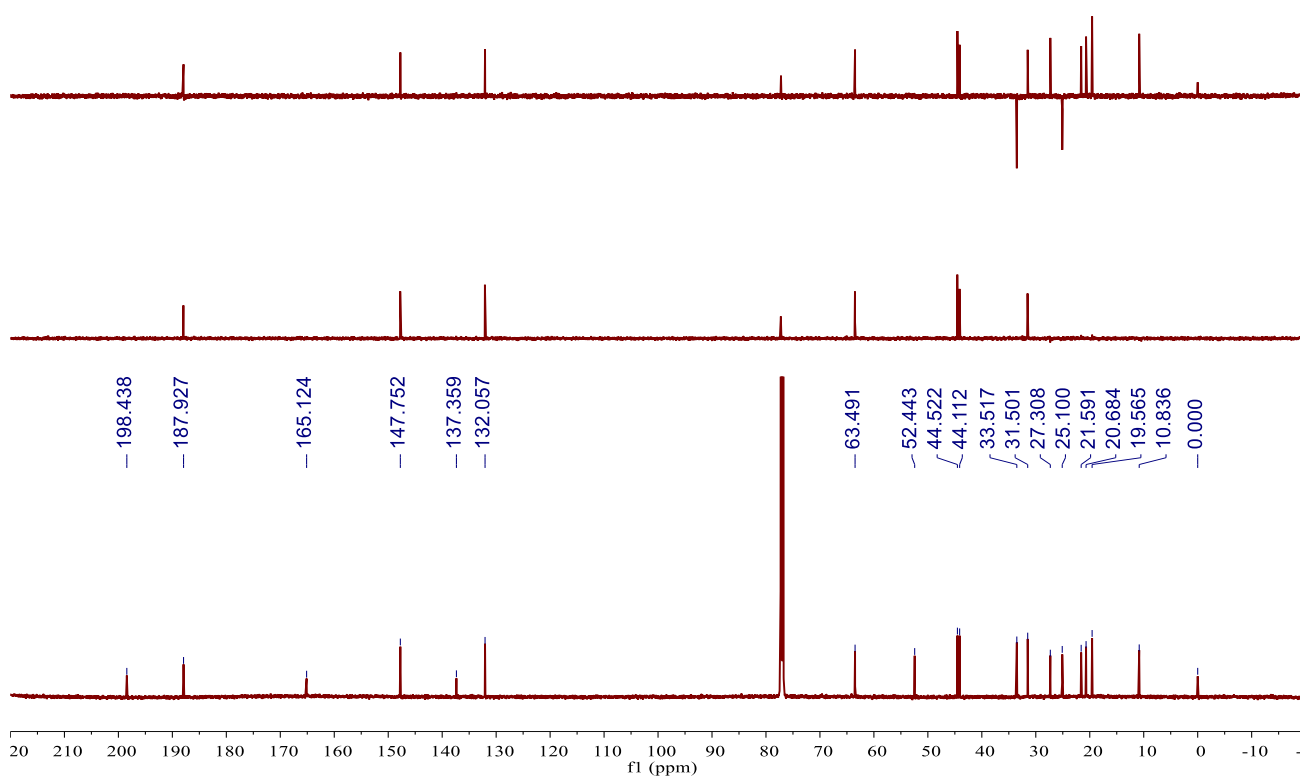

HSQC spectrum

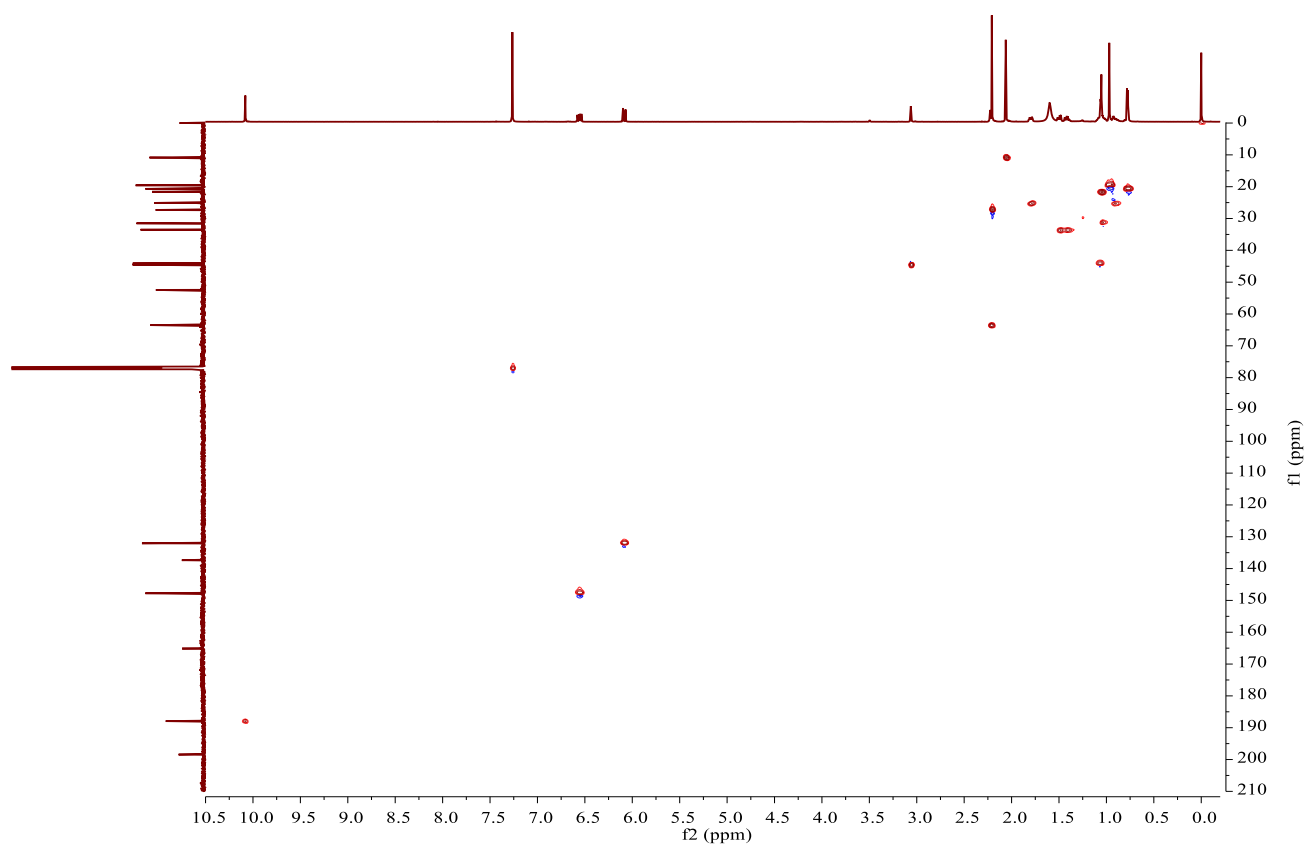

HMBC spectrum



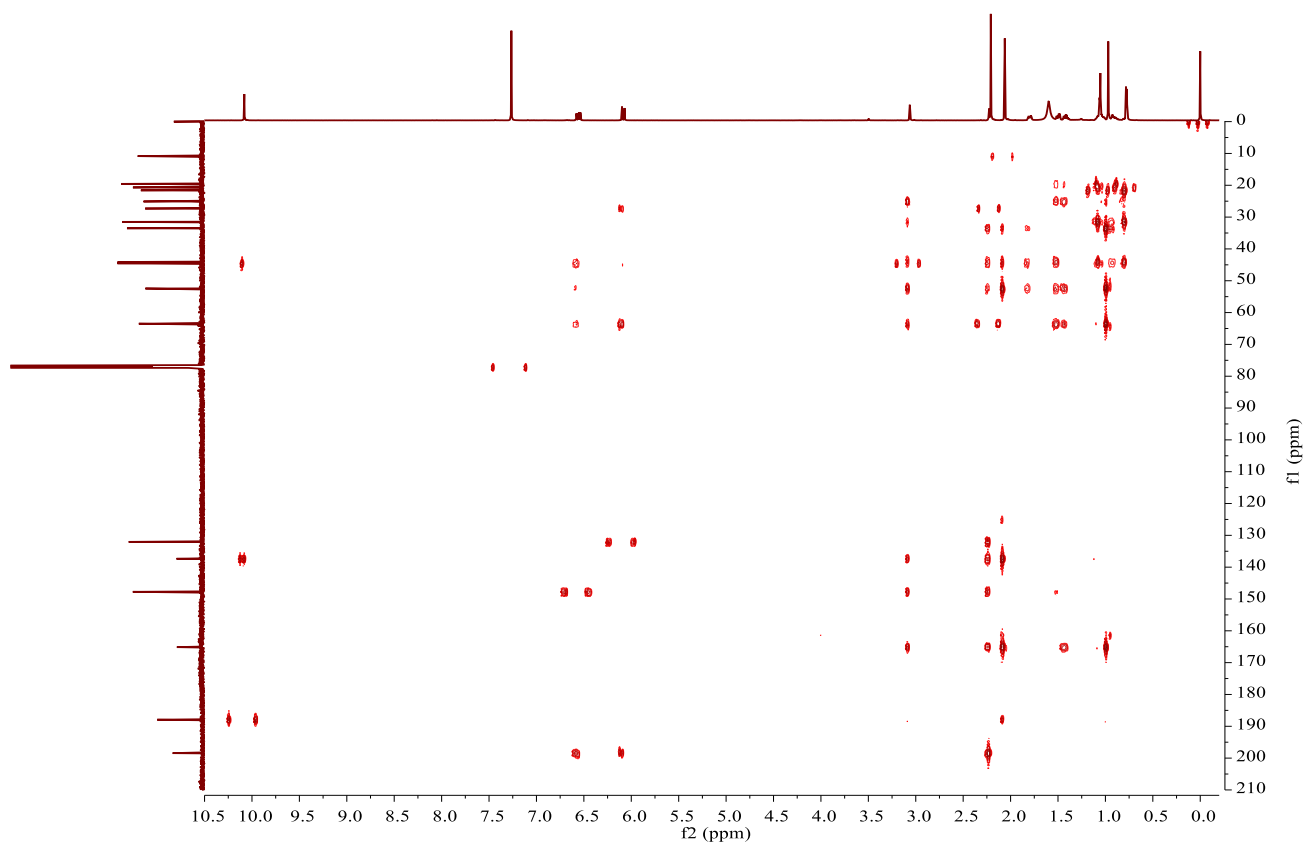

$^1\text{H}$ - $^1\text{H}$  COSY spectrum

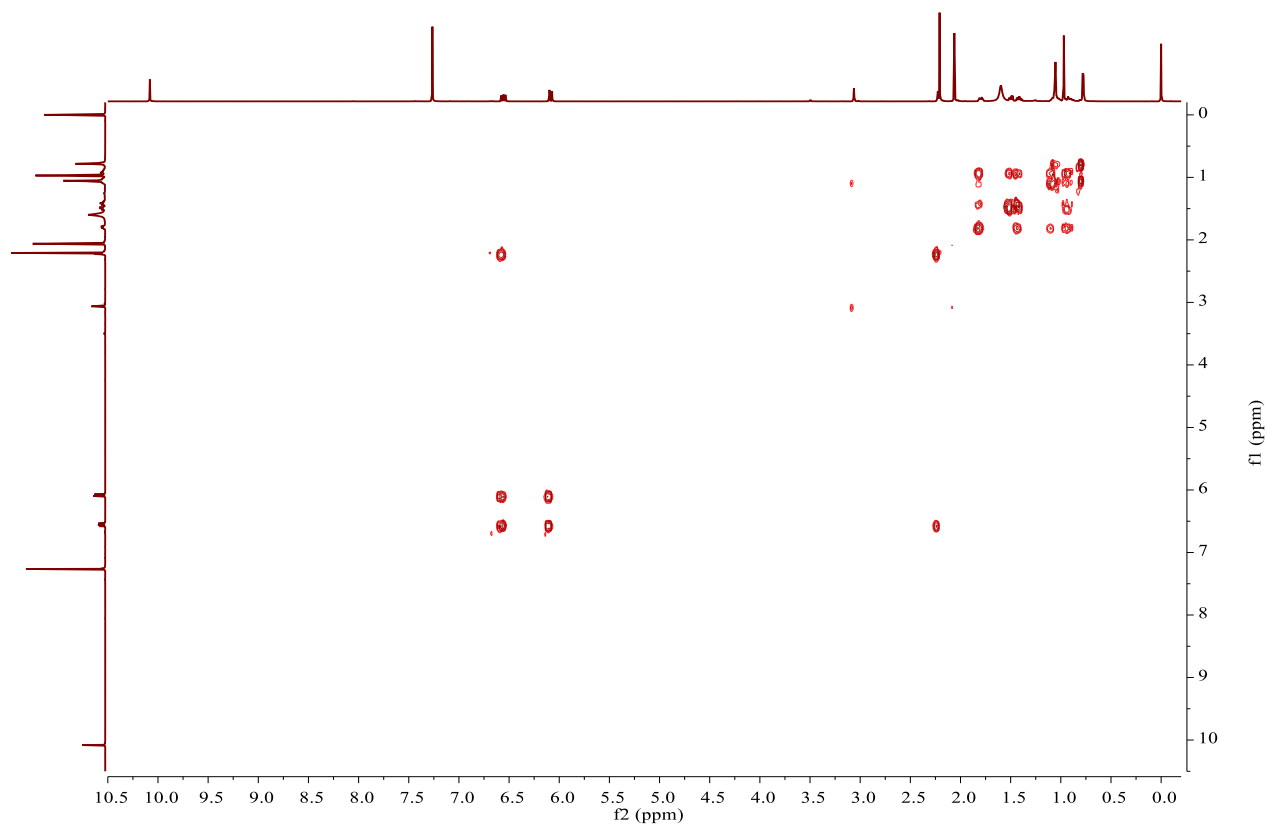

ROESY spectrum

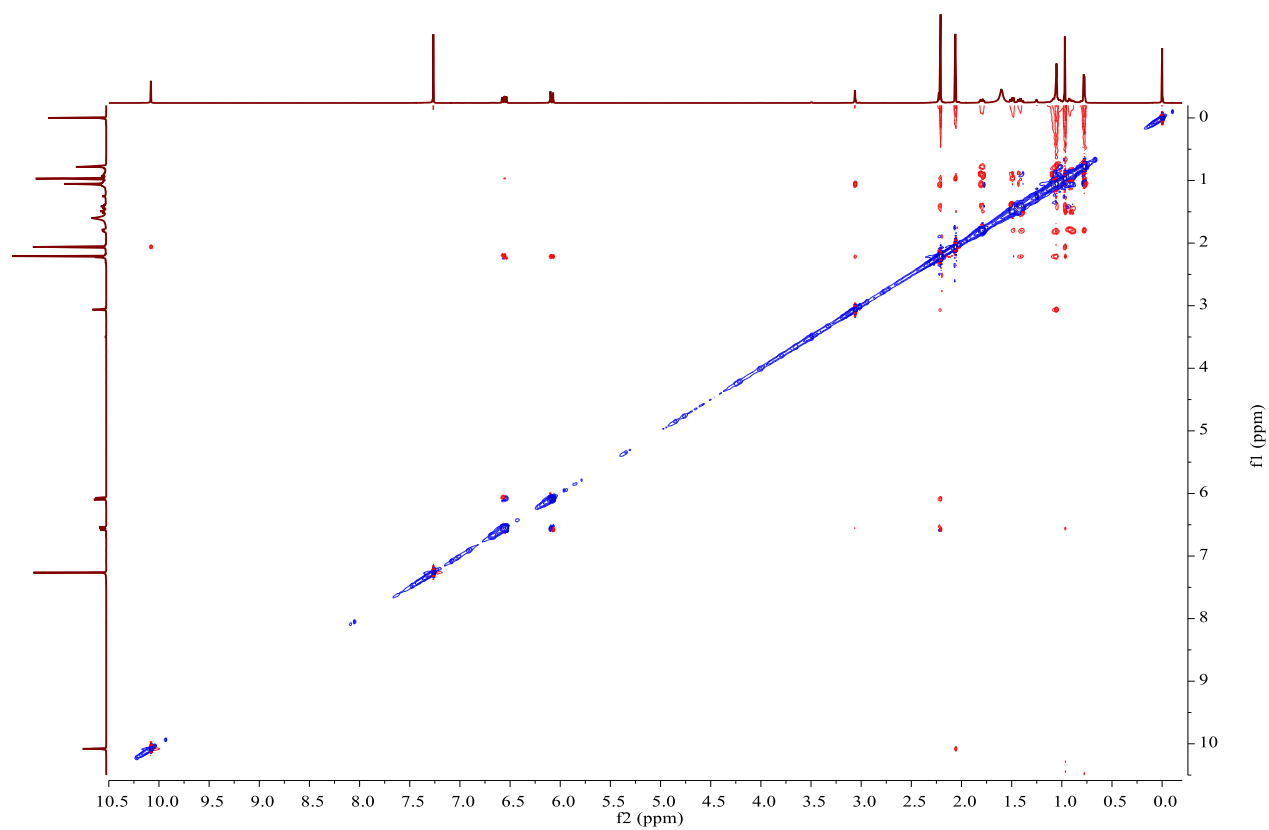

HRESIMS

T: FTMS + p ESI Full ms [150.0000-850.0000]

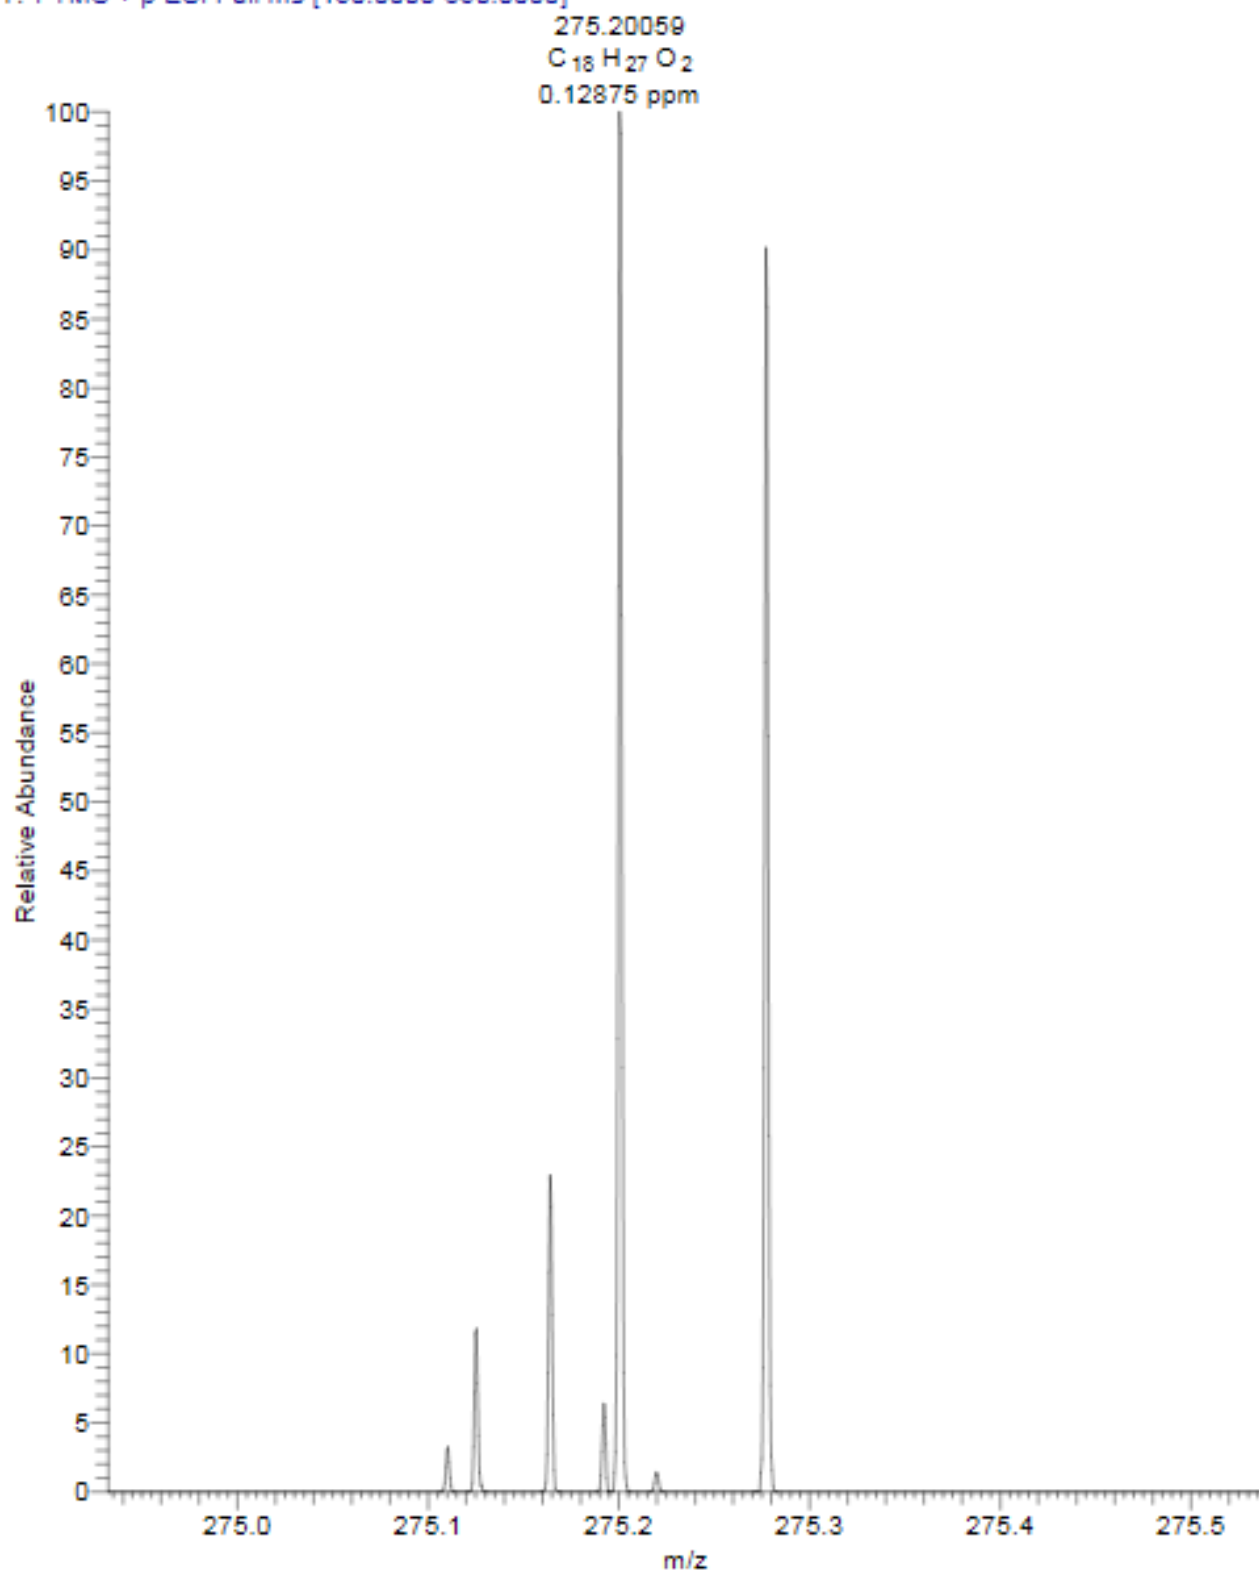

## CD spectra

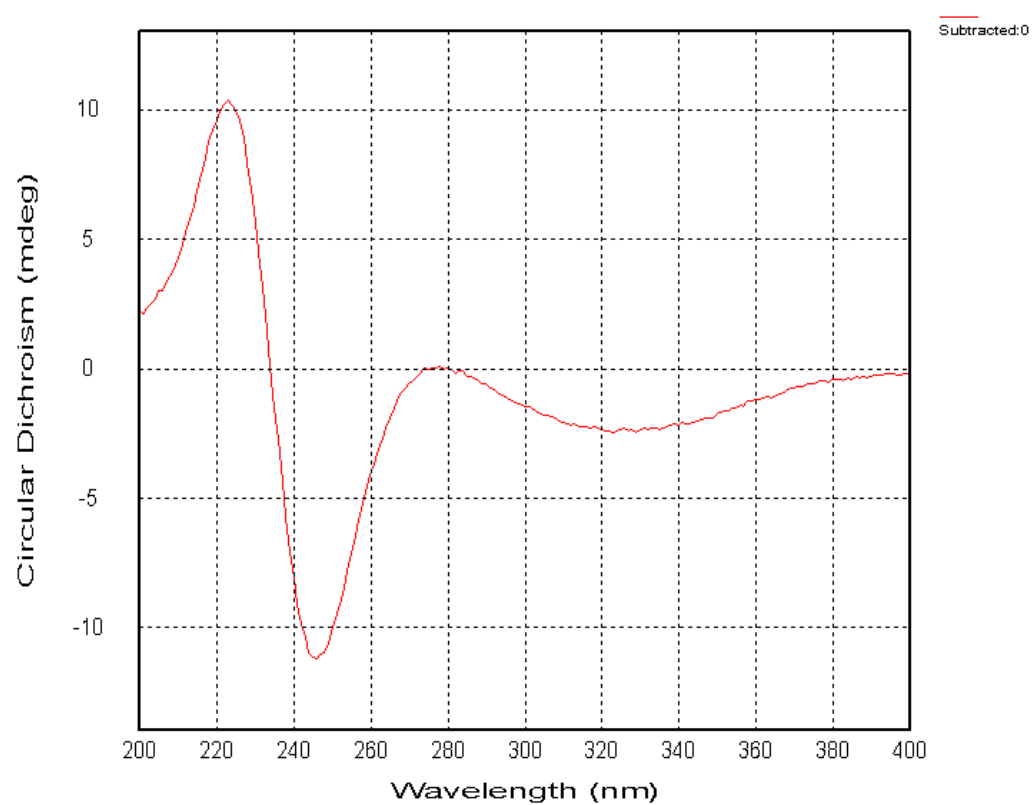

## S1.8 NMR, HRESIMS and CD spectra of bipolarisorokin H (8)

$^1\text{H}$  NMR spectrum

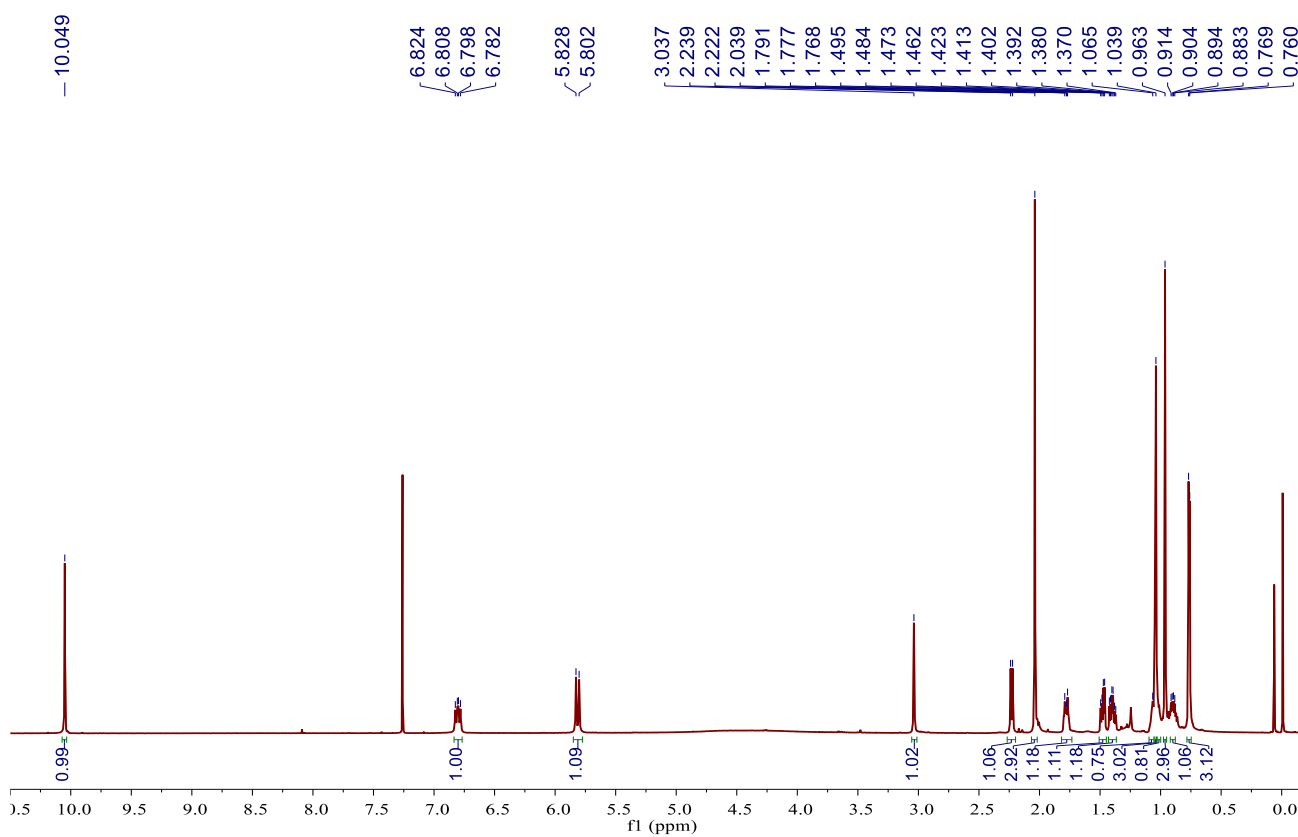

$^{13}\text{C}$  NMR and DEPT spectra

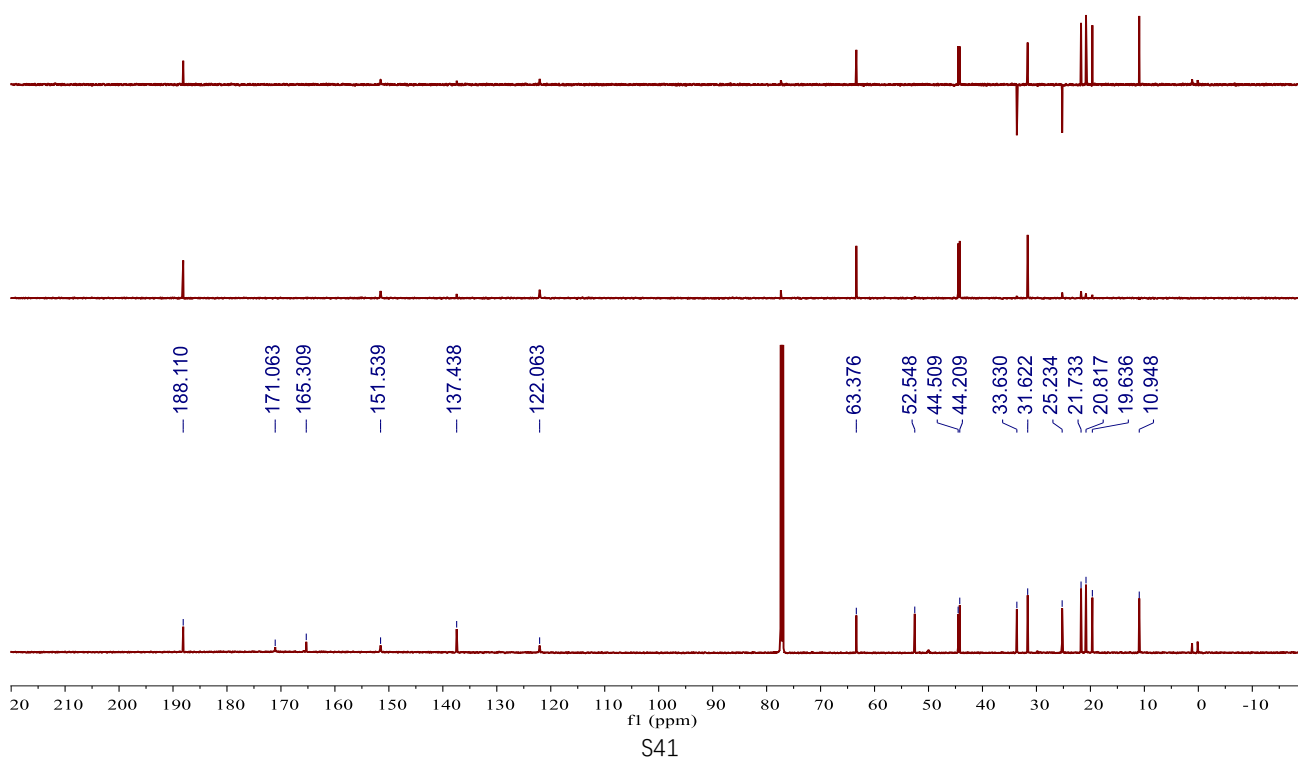

HSQC spectrum

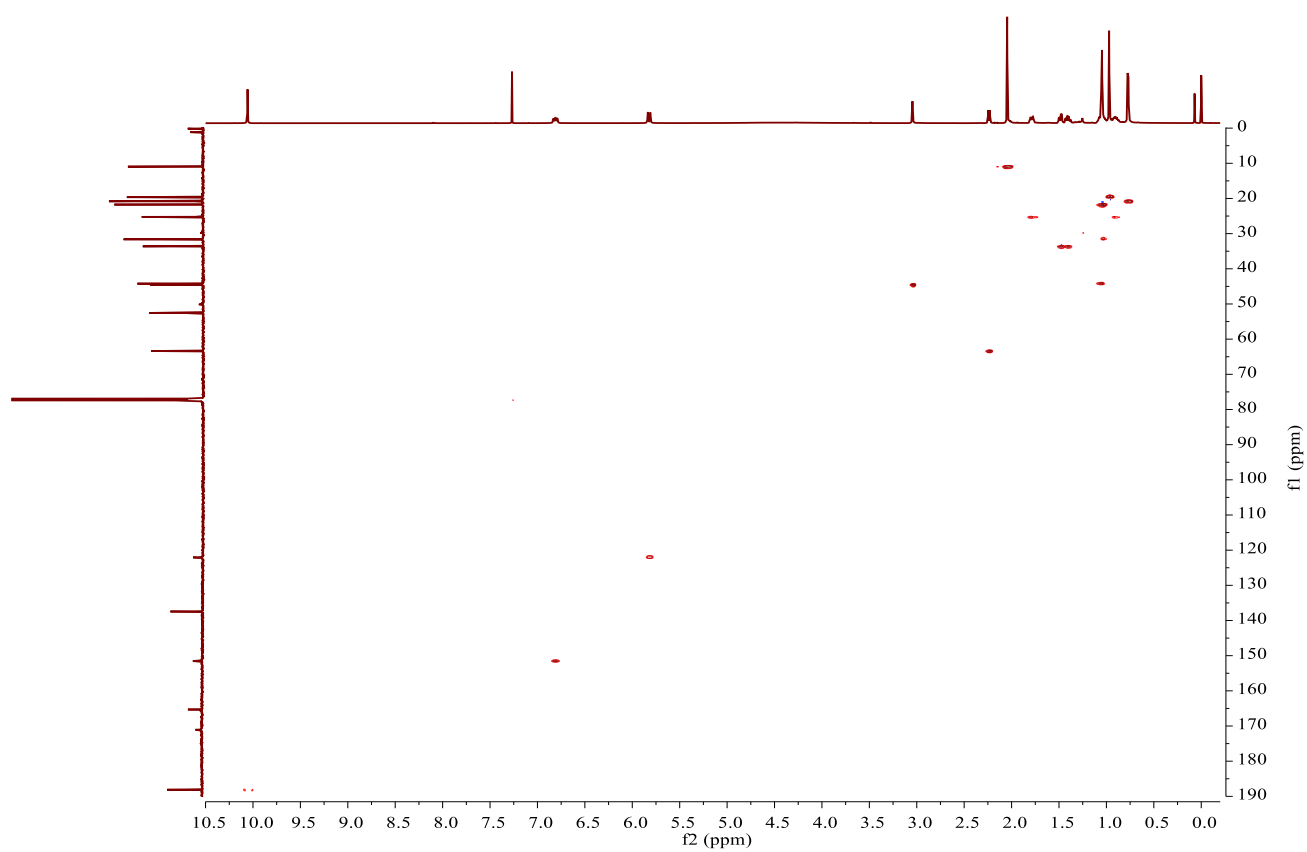

HMBC spectrum

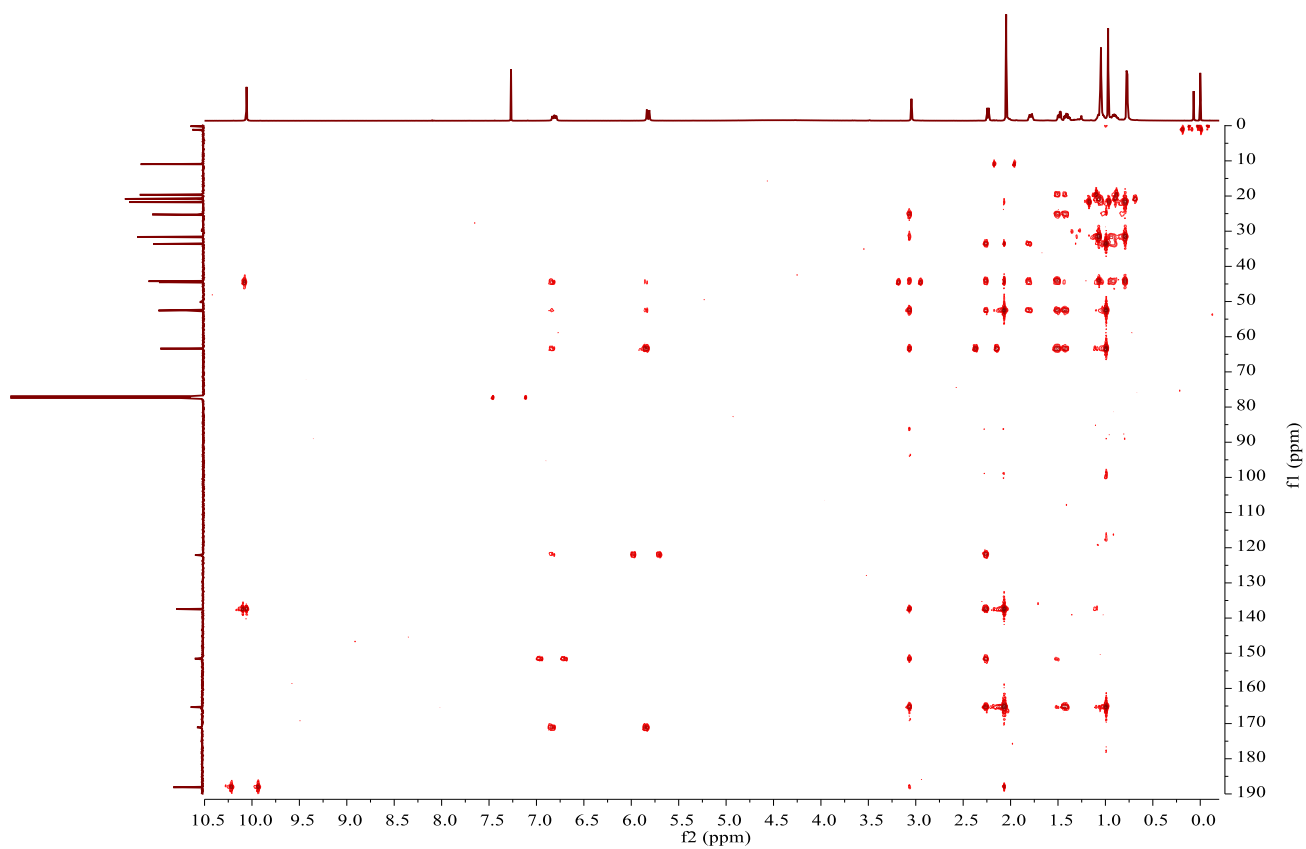

$^1\text{H}$ - $^1\text{H}$  COSY spectrum

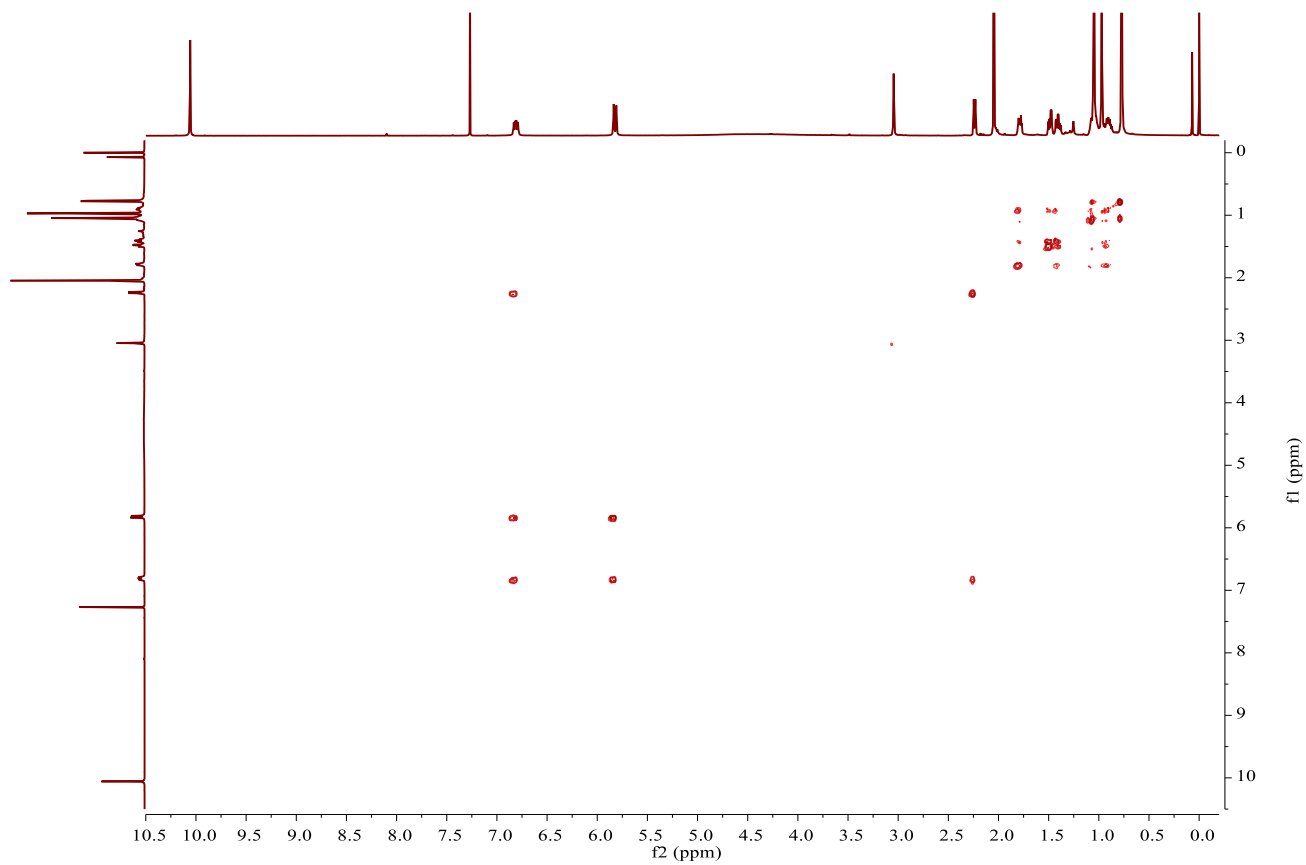

ROESY spectrum

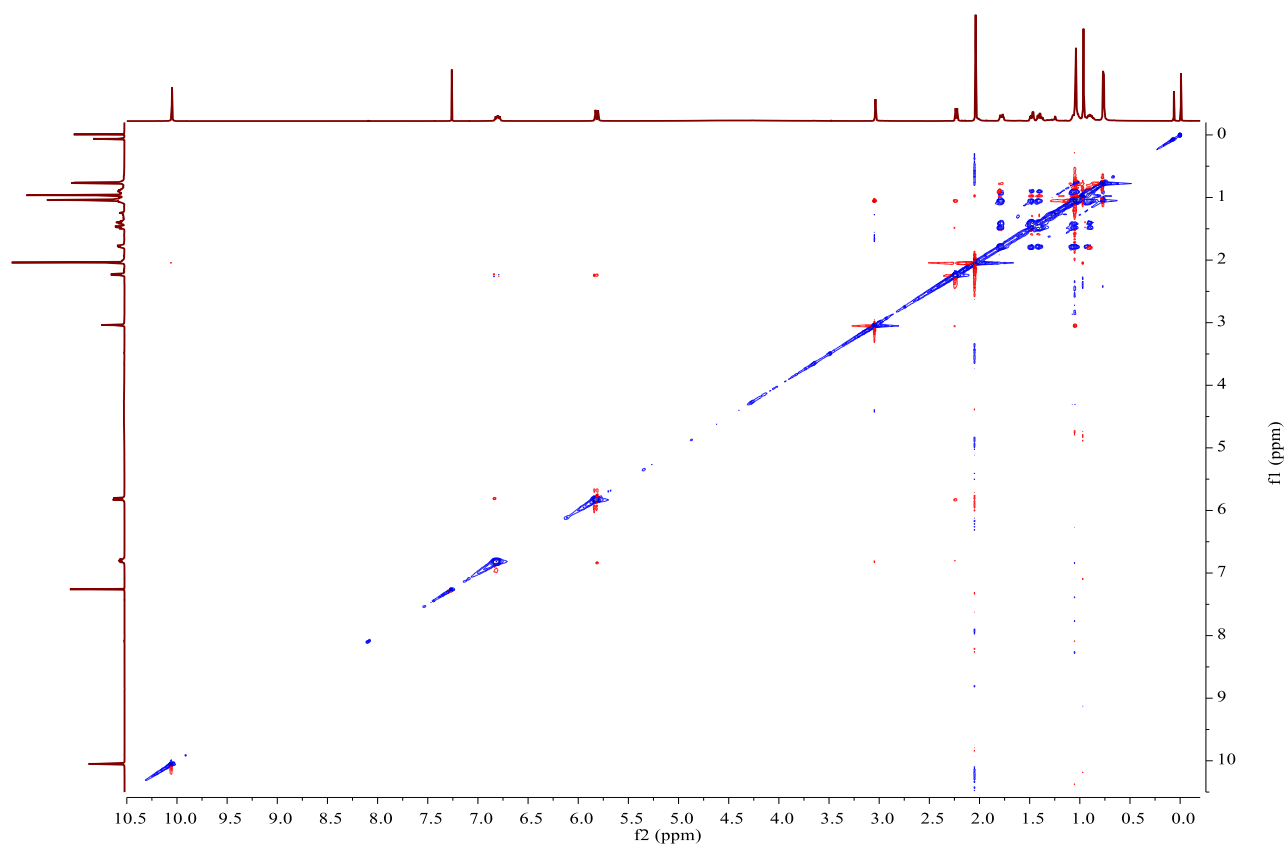

HRESIMS



T: FTMS + p ESI Full lock ms [150.0000-1100.0000]

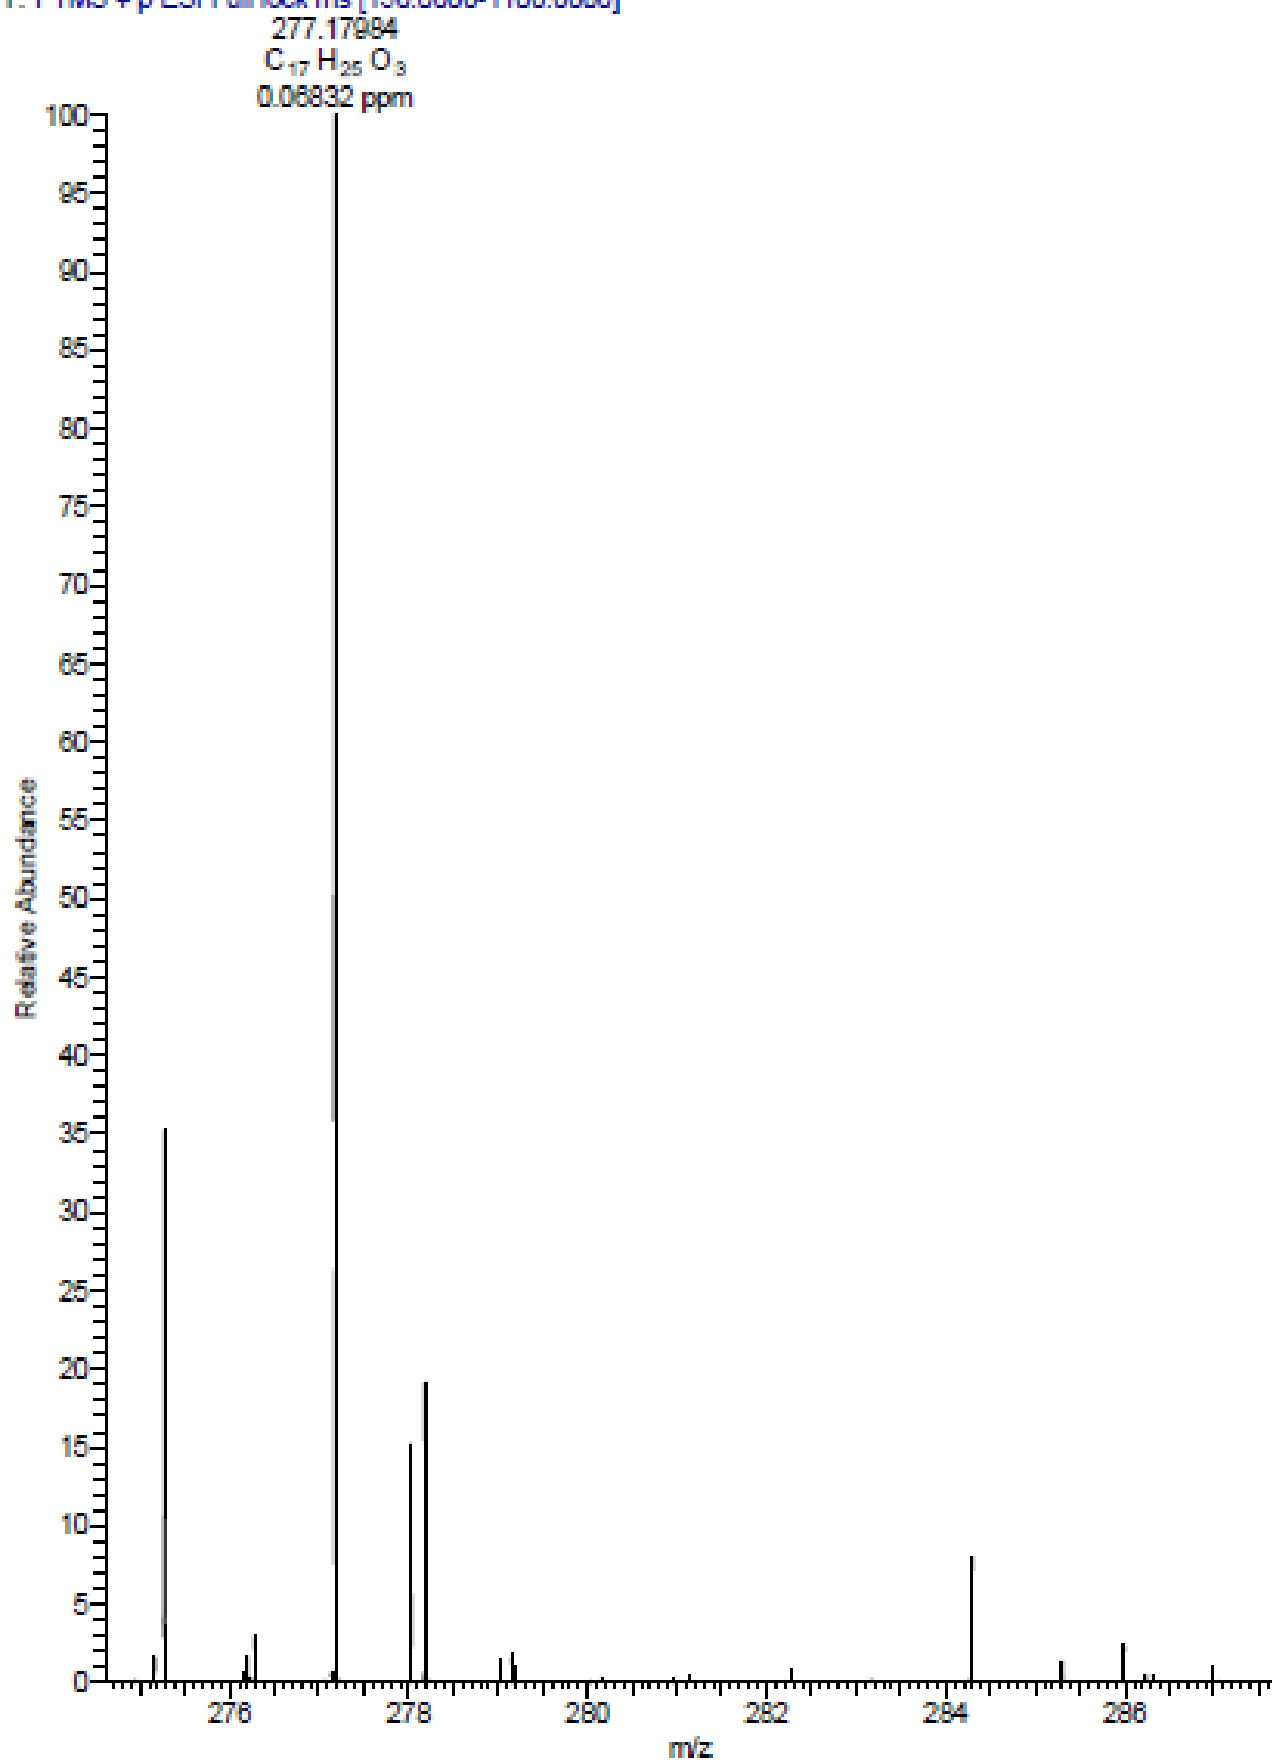

## CD spectra

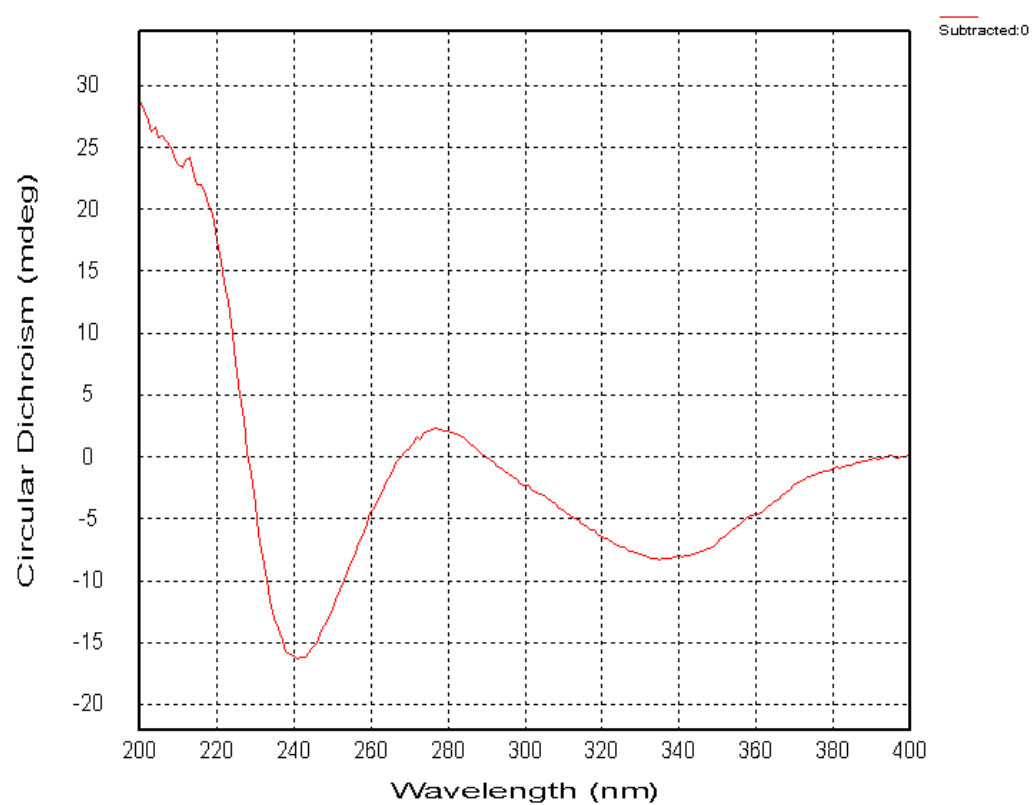

## S1.9 NMR and HRESIMS spectra of bipolarisorokin I (9)

$^1\text{H}$  NMR spectrum

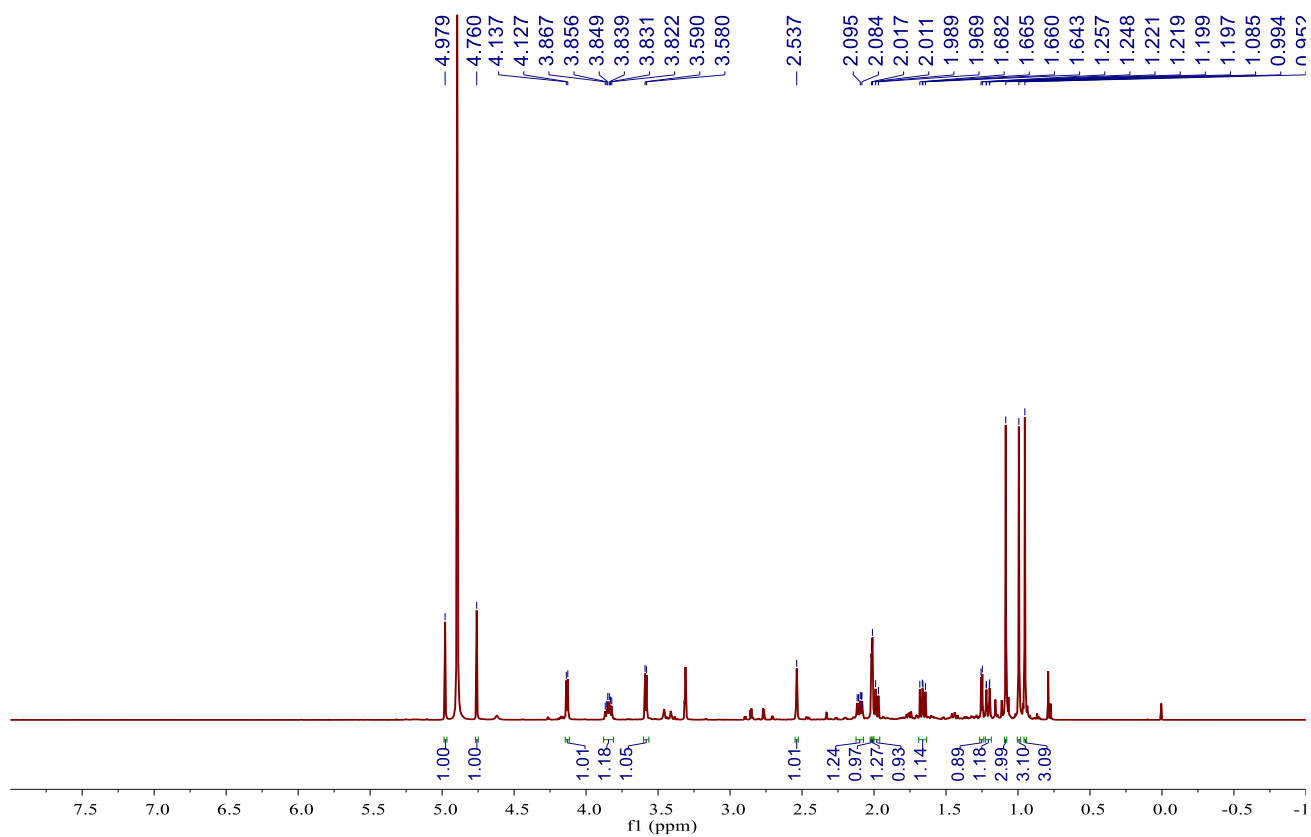

$^{13}\text{C}$  NMR and DEPT spectra

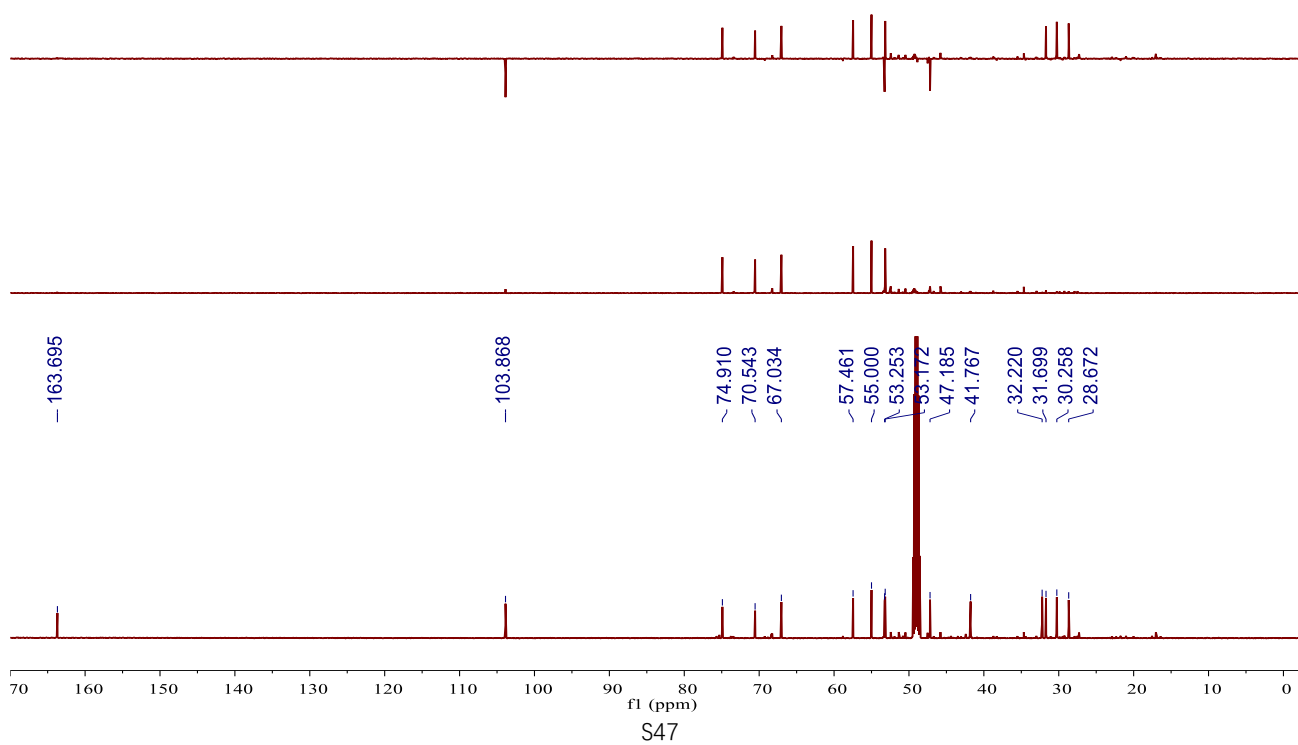

HSQC spectrum

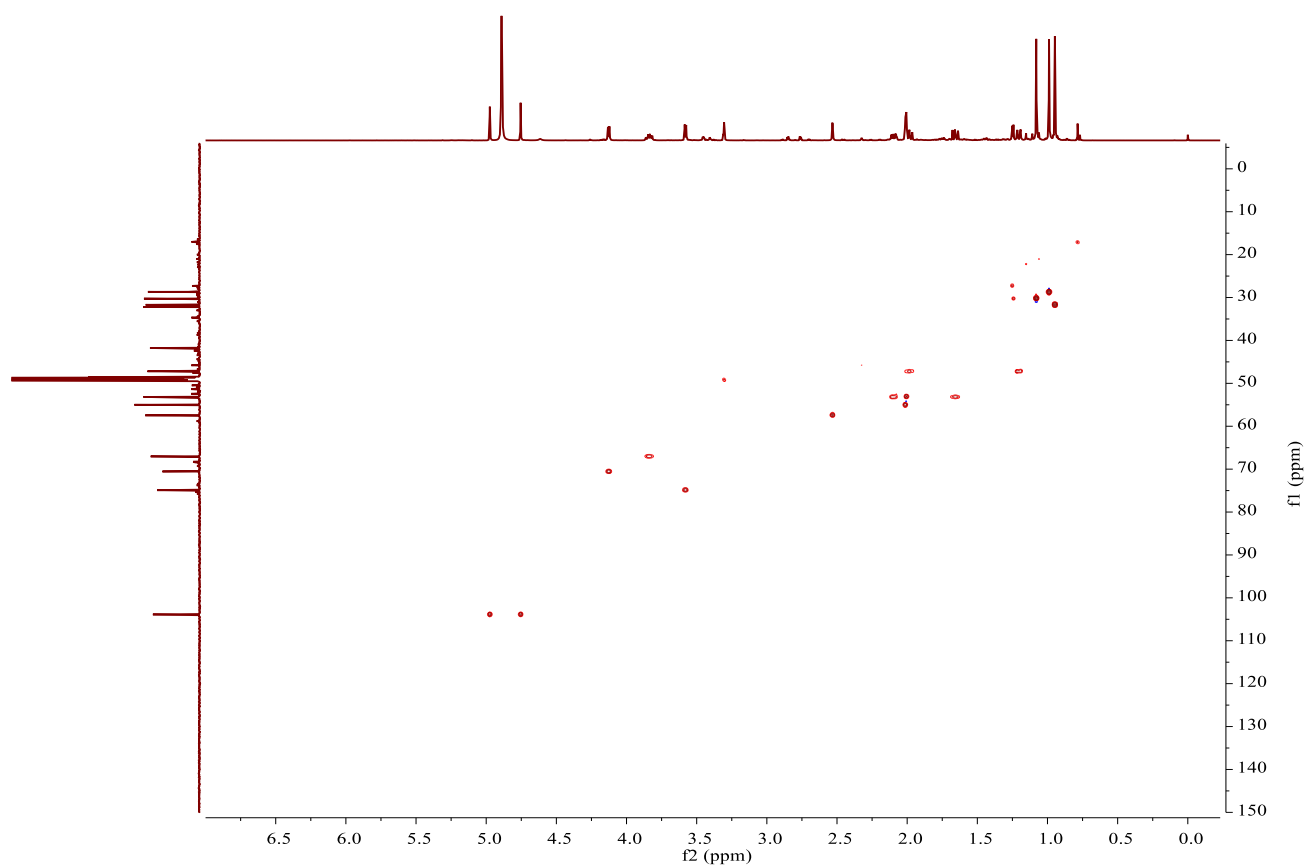

HMBC spectrum

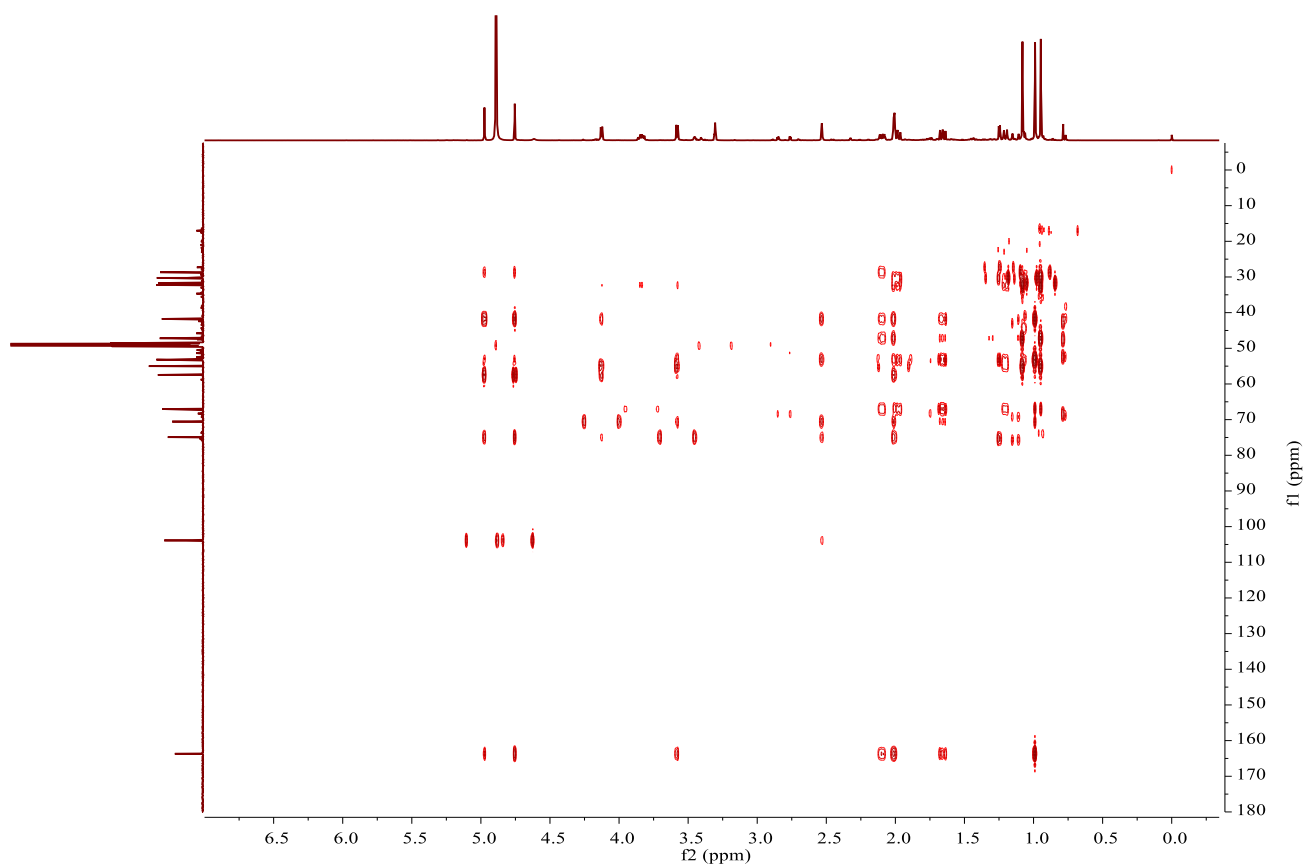

$^1\text{H}$ - $^1\text{H}$  COSY spectrum

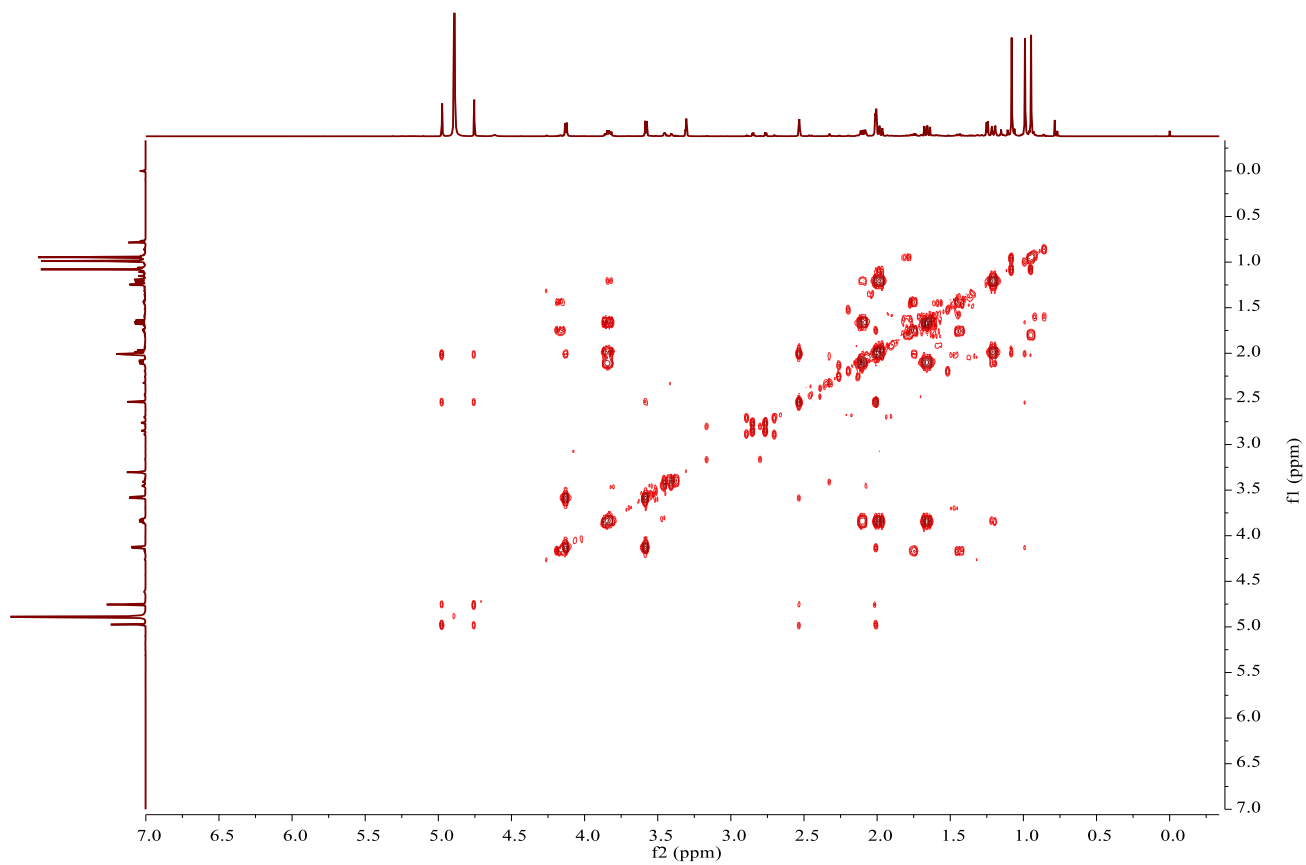

ROESY spectrum

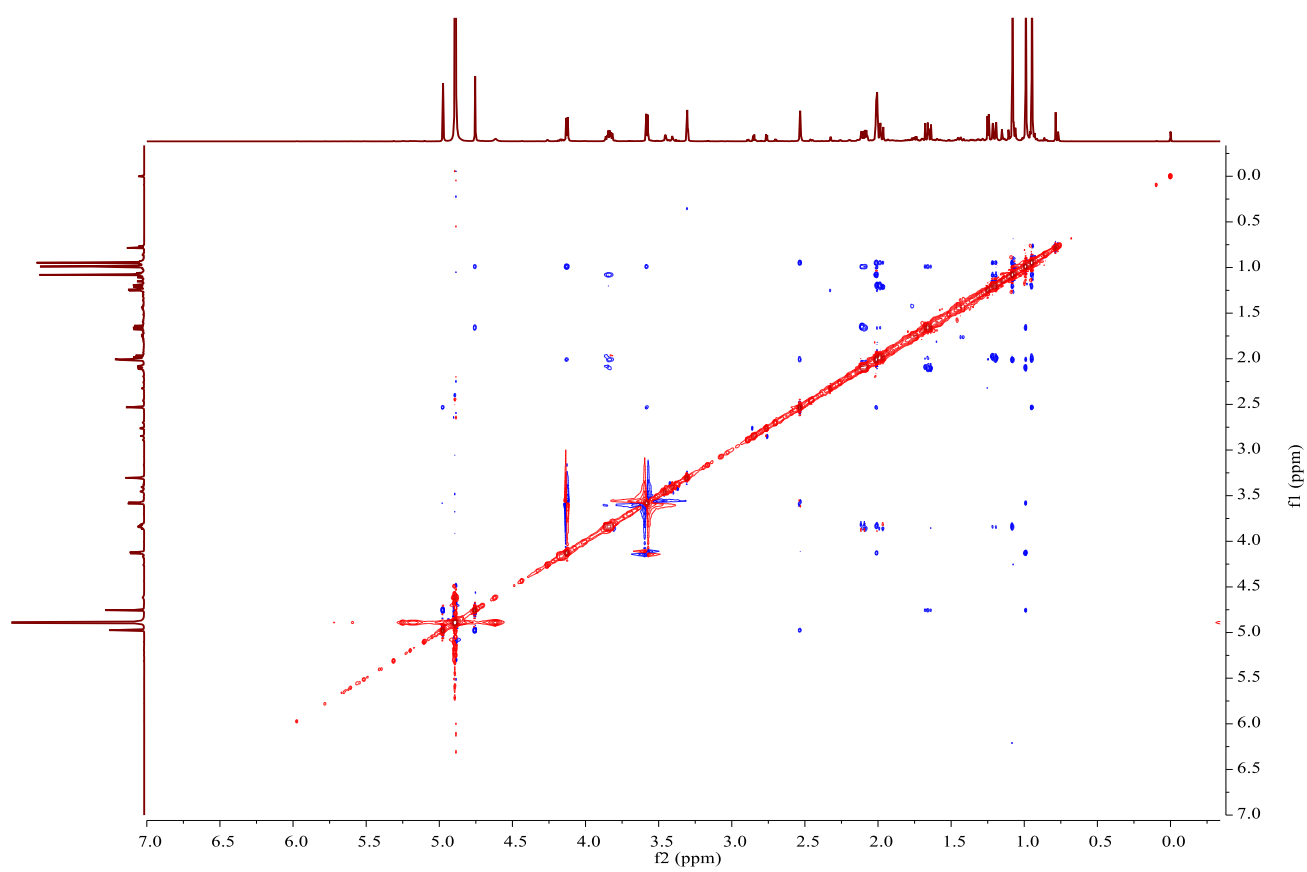

HRESIMS

T: FTMS - p ESI Full lock ms [150.0000-800.0000]

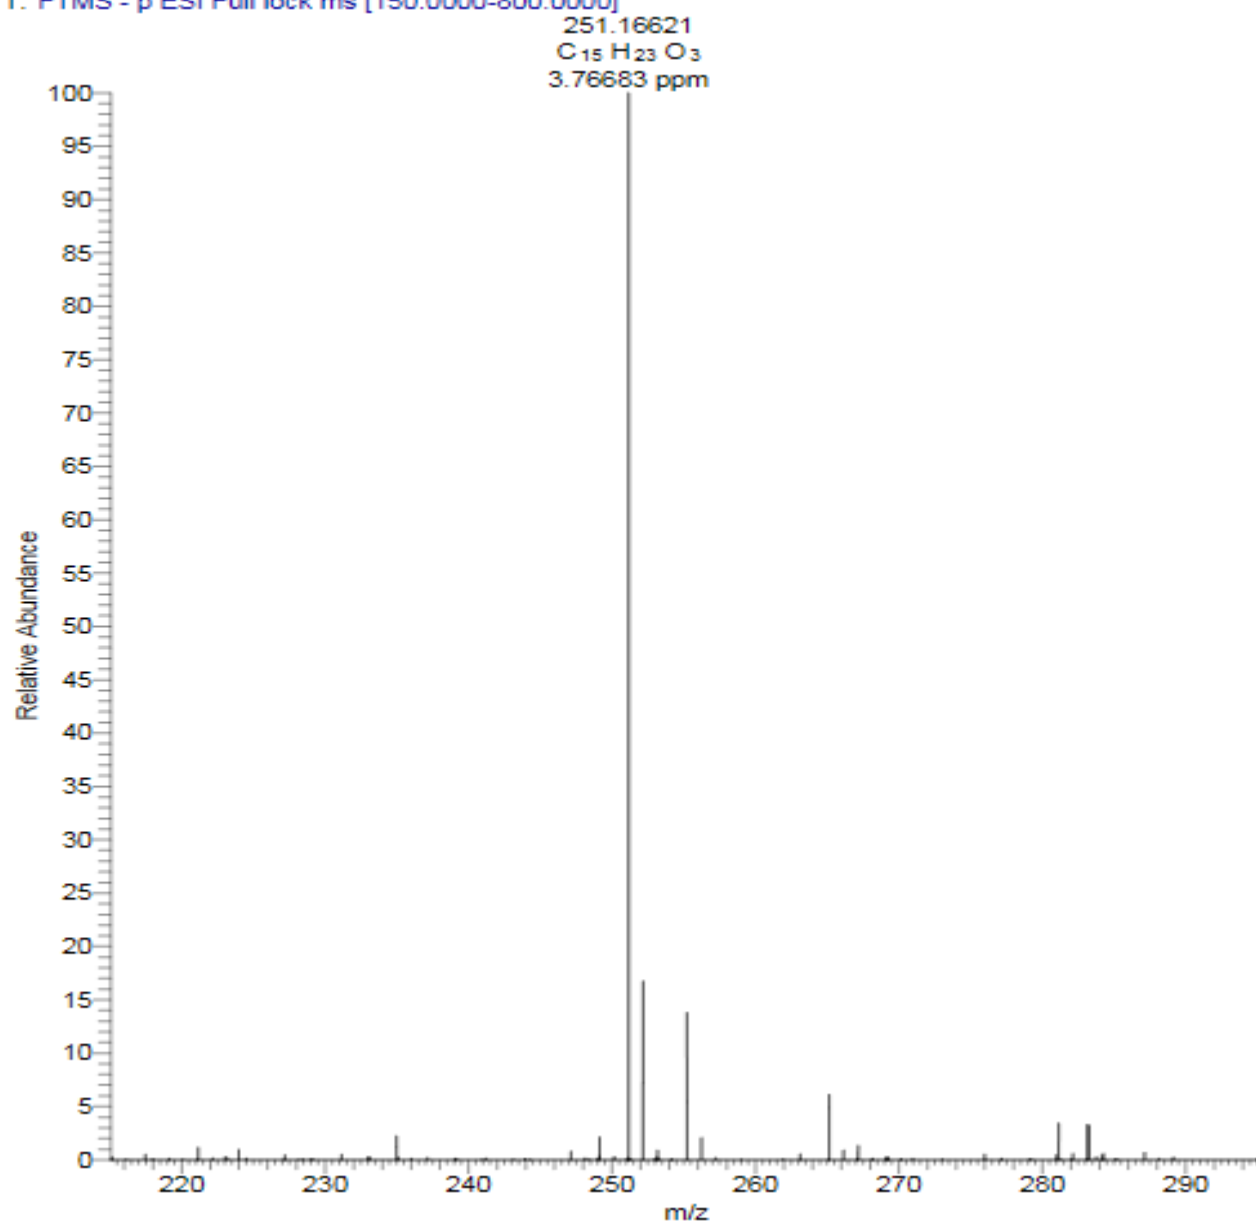

## S1.10 NMR, HRESIMS and CD spectra of bipolarithone A (10)

$^1\text{H}$  NMR spectrum

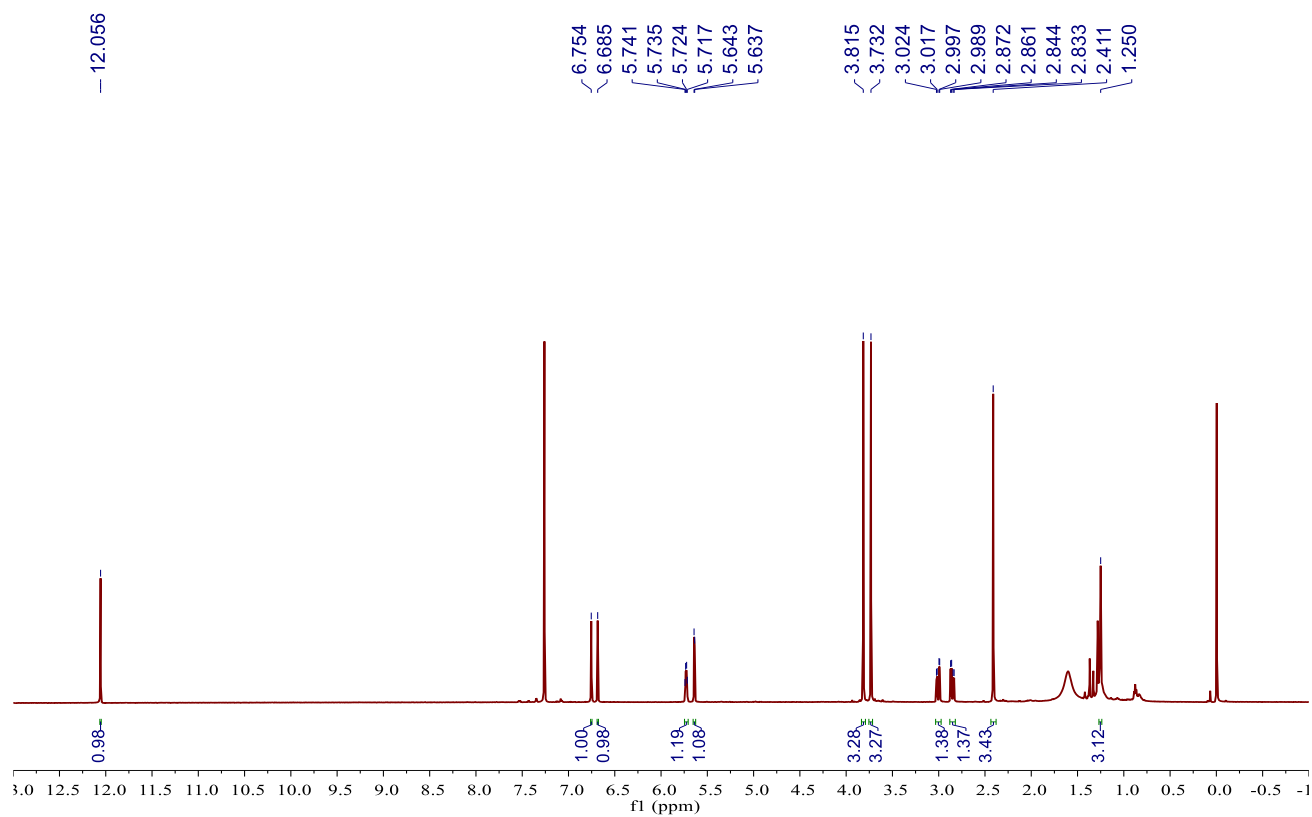

$^{13}\text{C}$  NMR and DEPT spectra

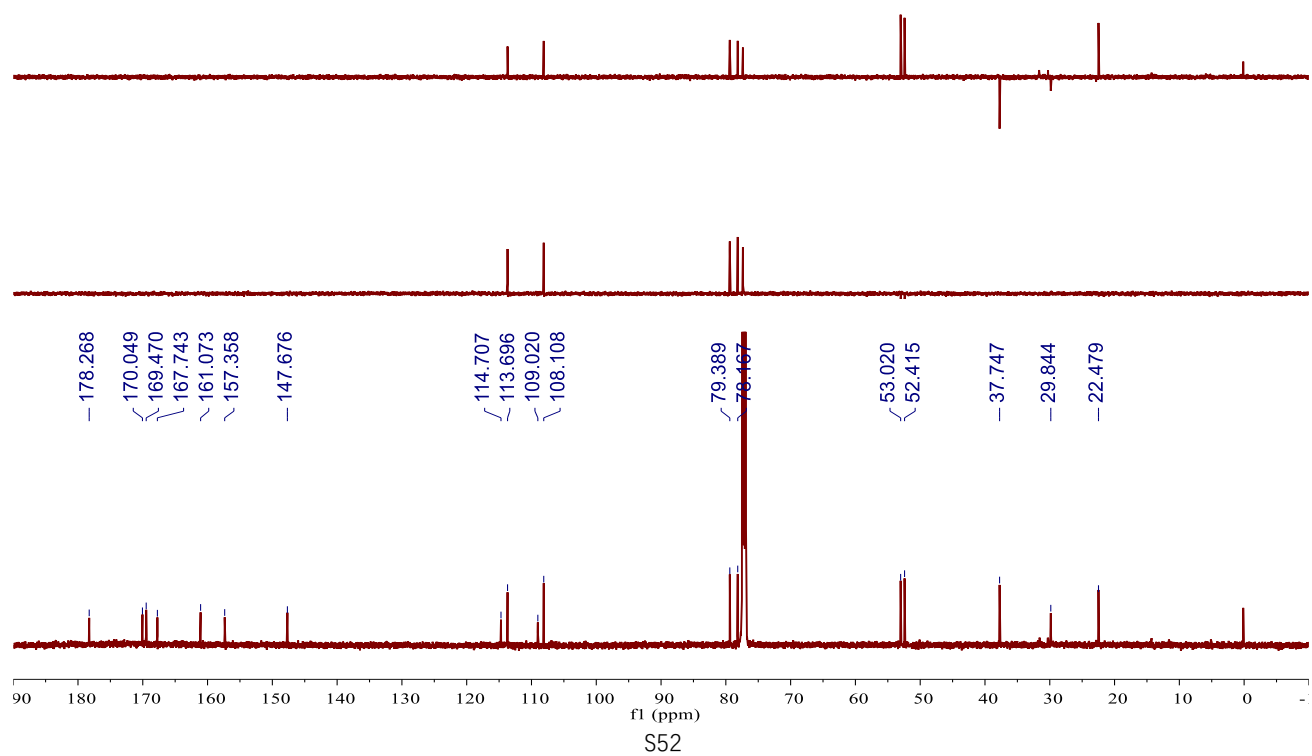



HSQC spectrum

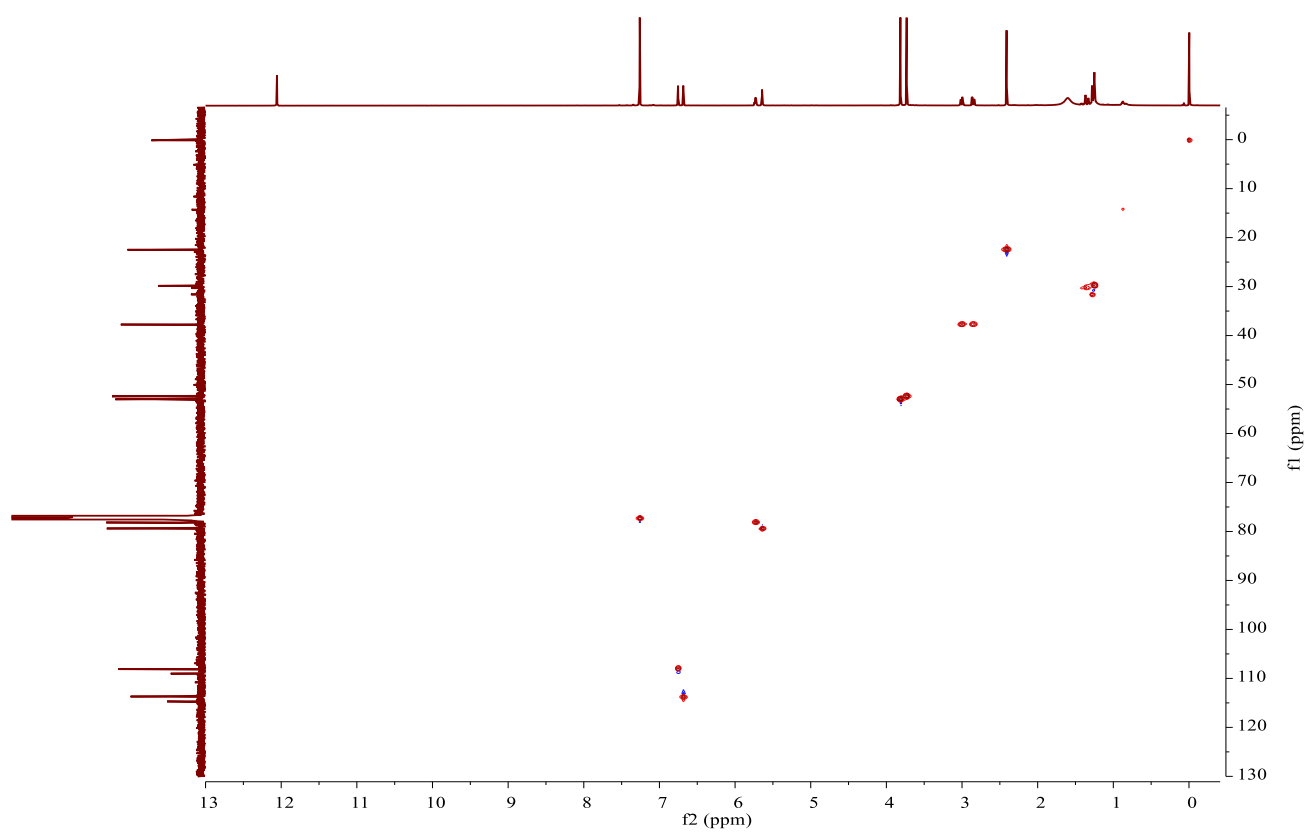

HMBC spectrum

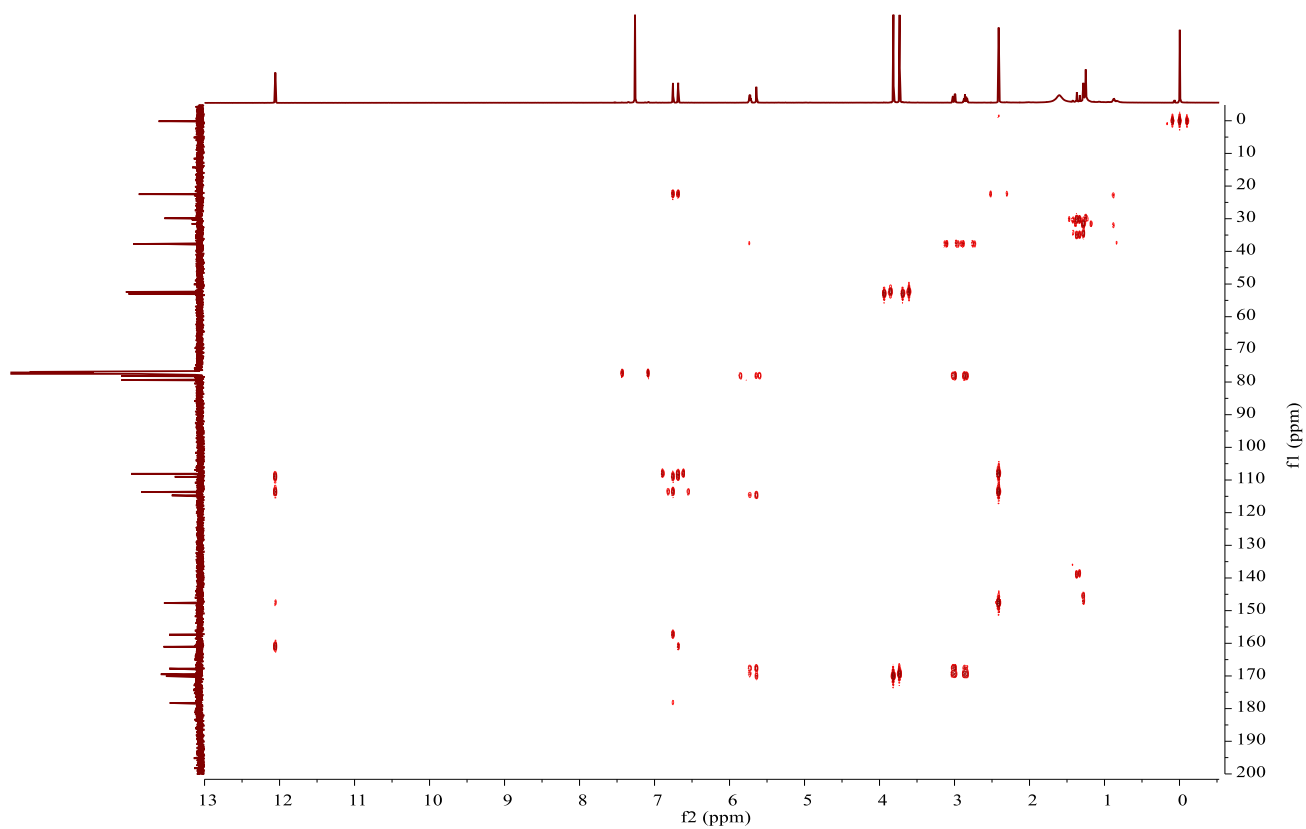

$^1\text{H}$ - $^1\text{H}$  COSY spectrum

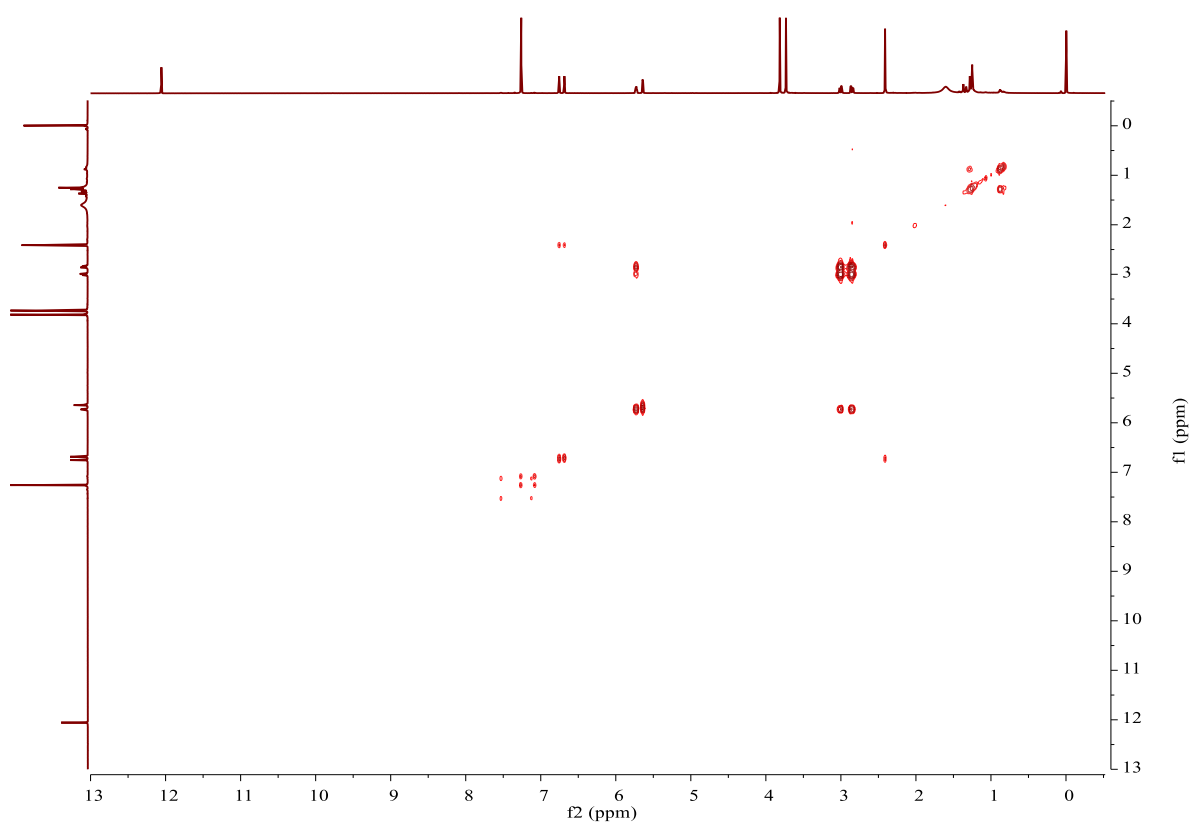

ROESY spectrum

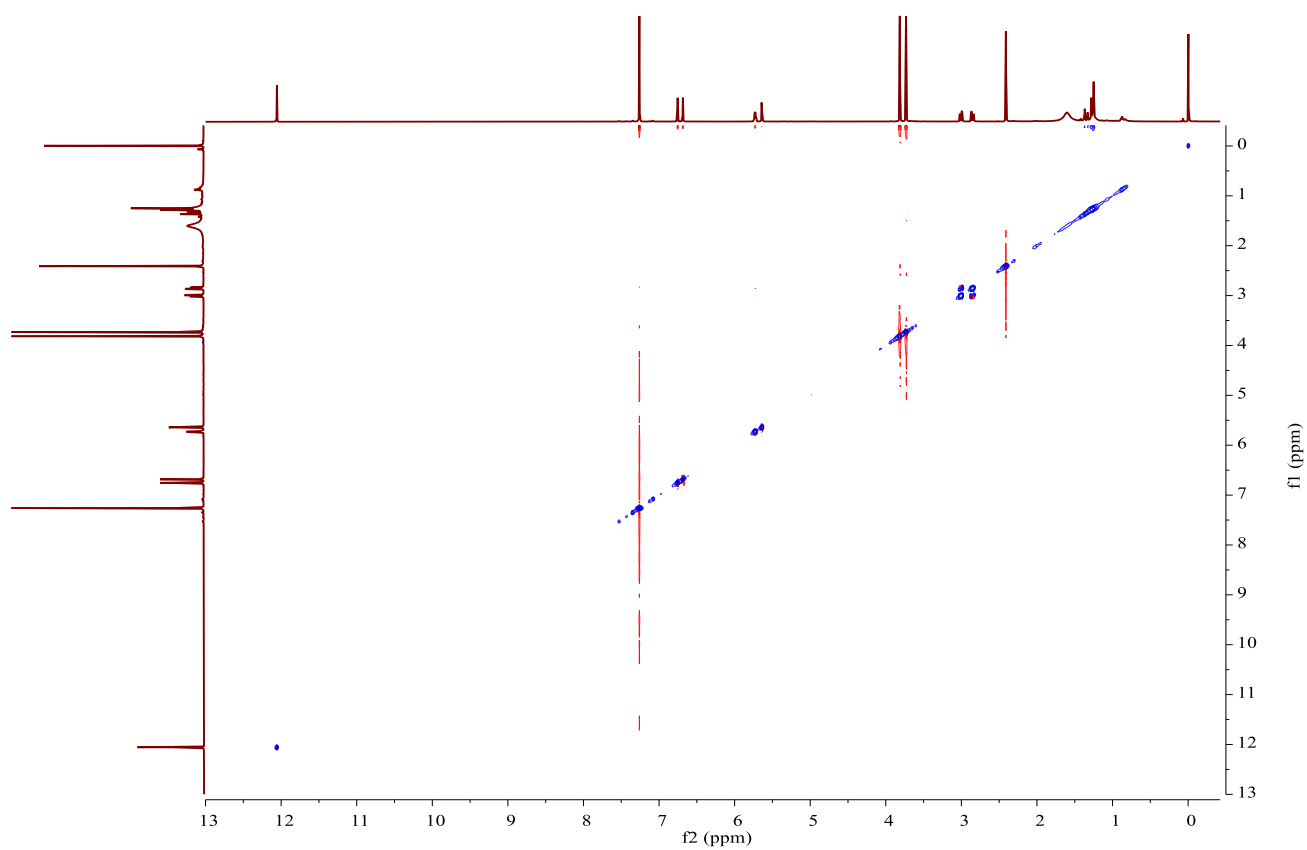

HRESIMS

T: FTMS + p ESI Full lock ms [150.0000-850.0000]

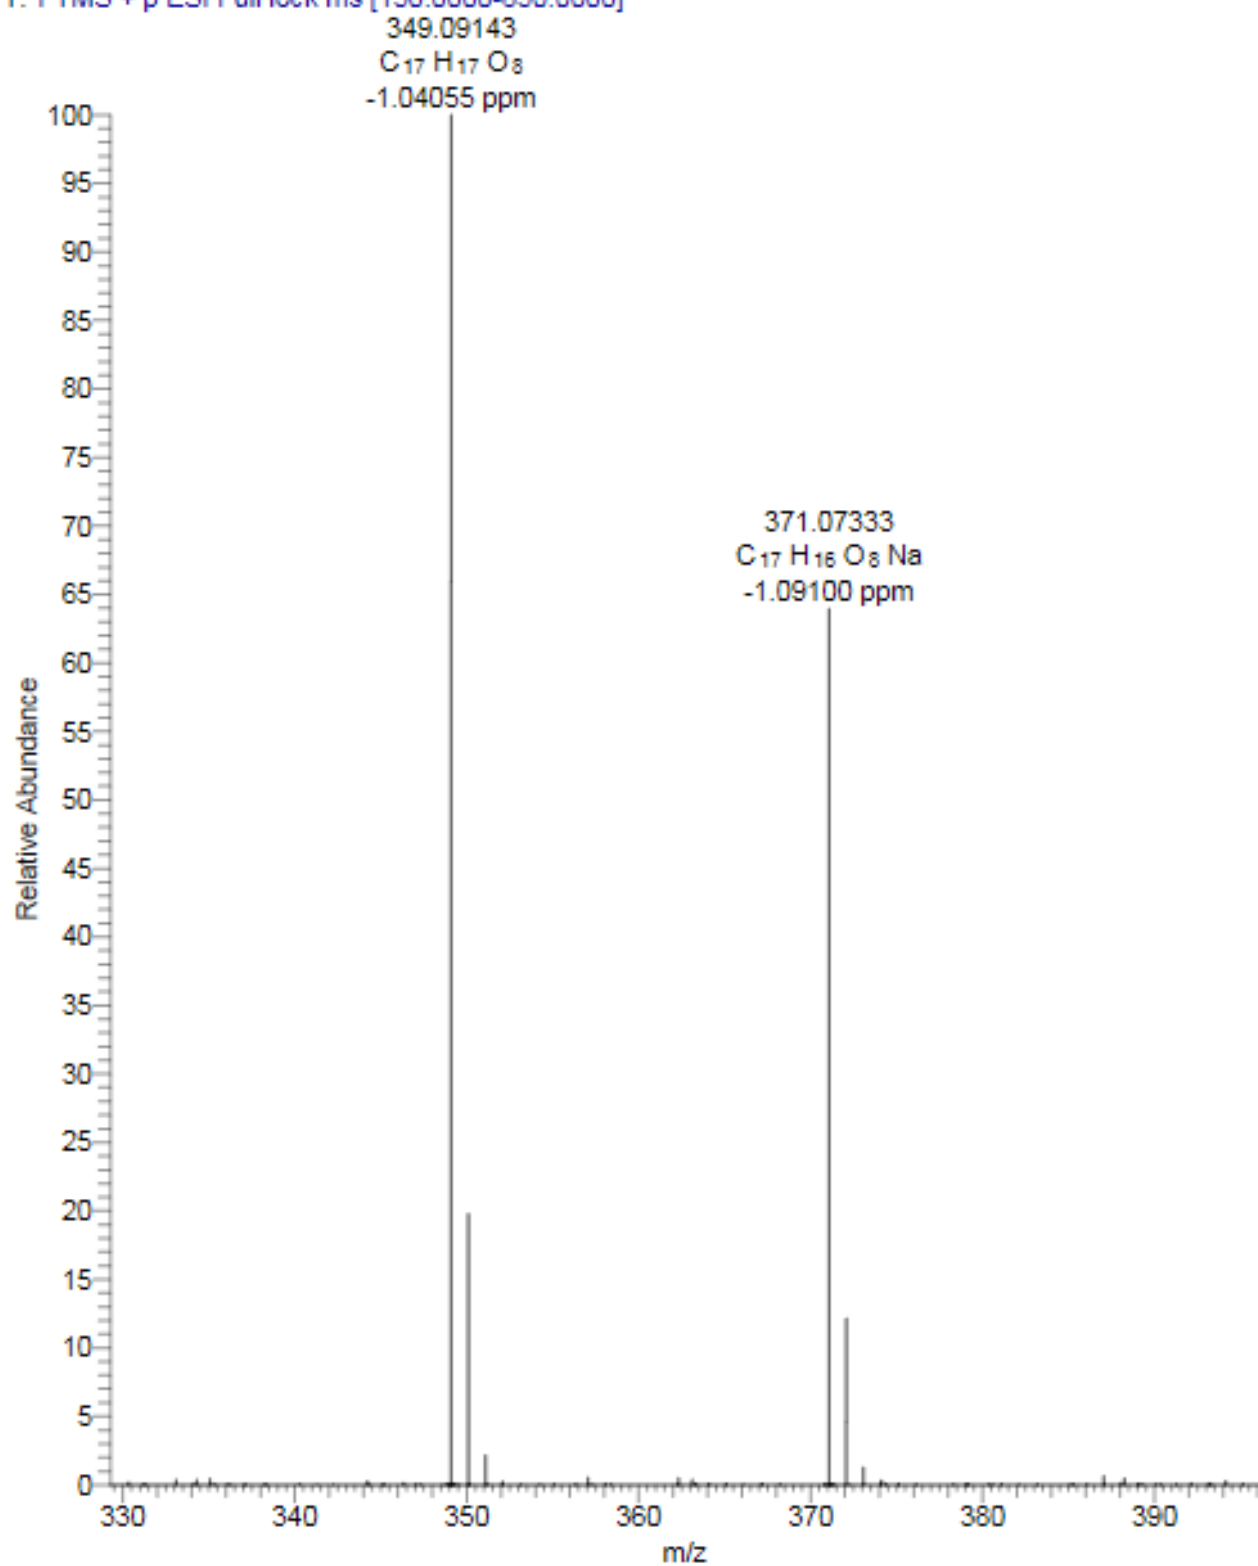

## CD spectra

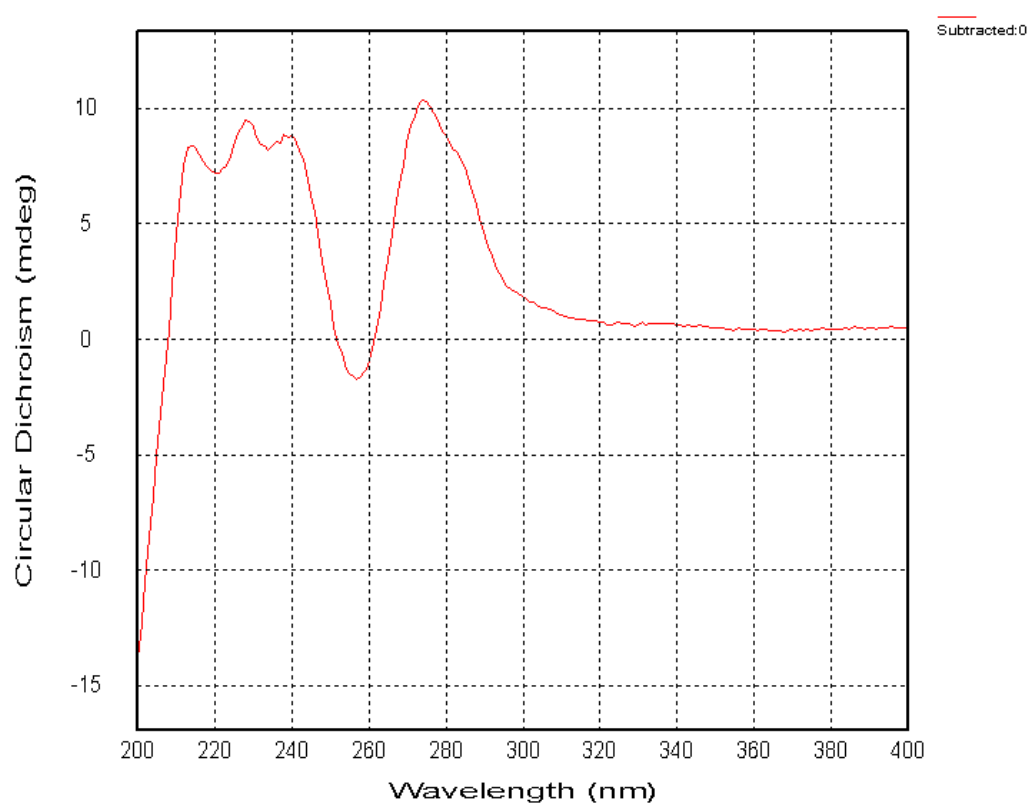

## S1.11 NMR, HRESIMS and CD spectra of bipolarithone B (11)

$^1\text{H}$  NMR spectrum

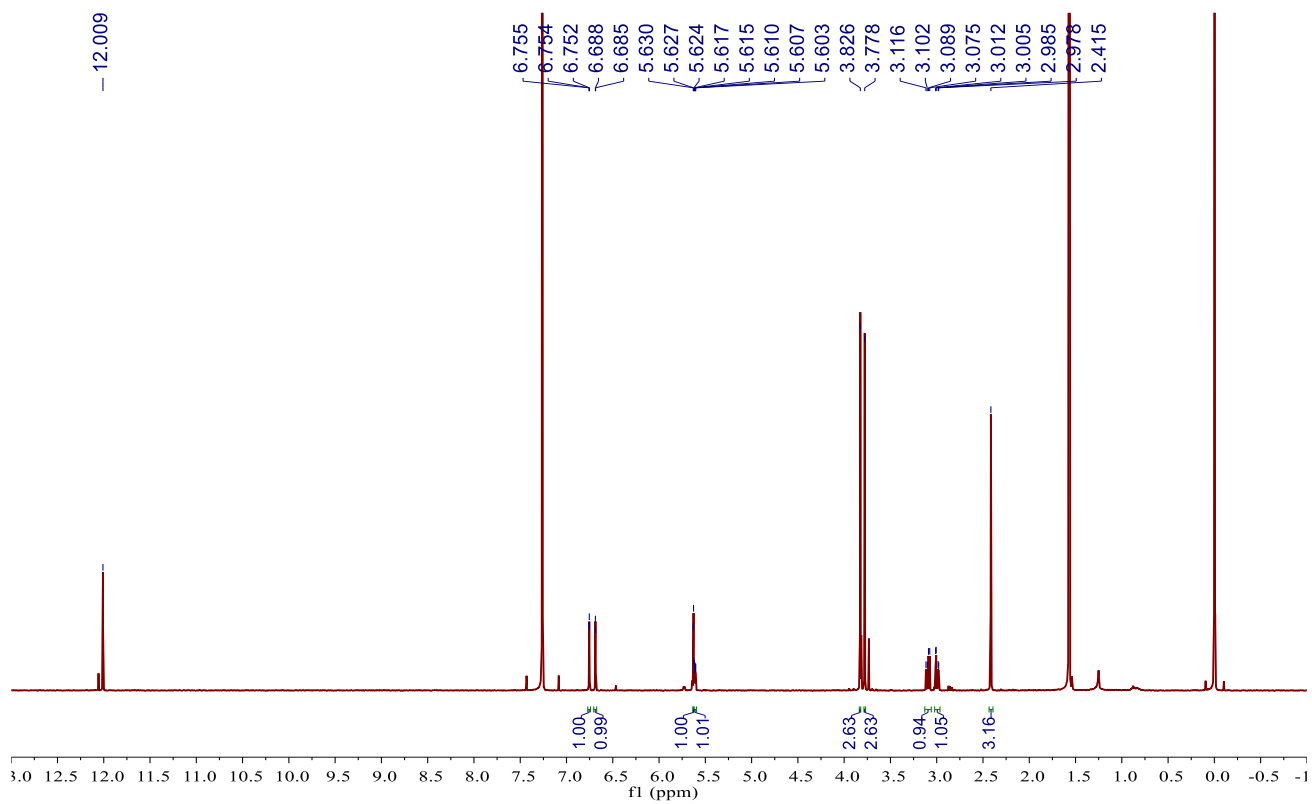

$^{13}\text{C}$  NMR and DEPT spectra

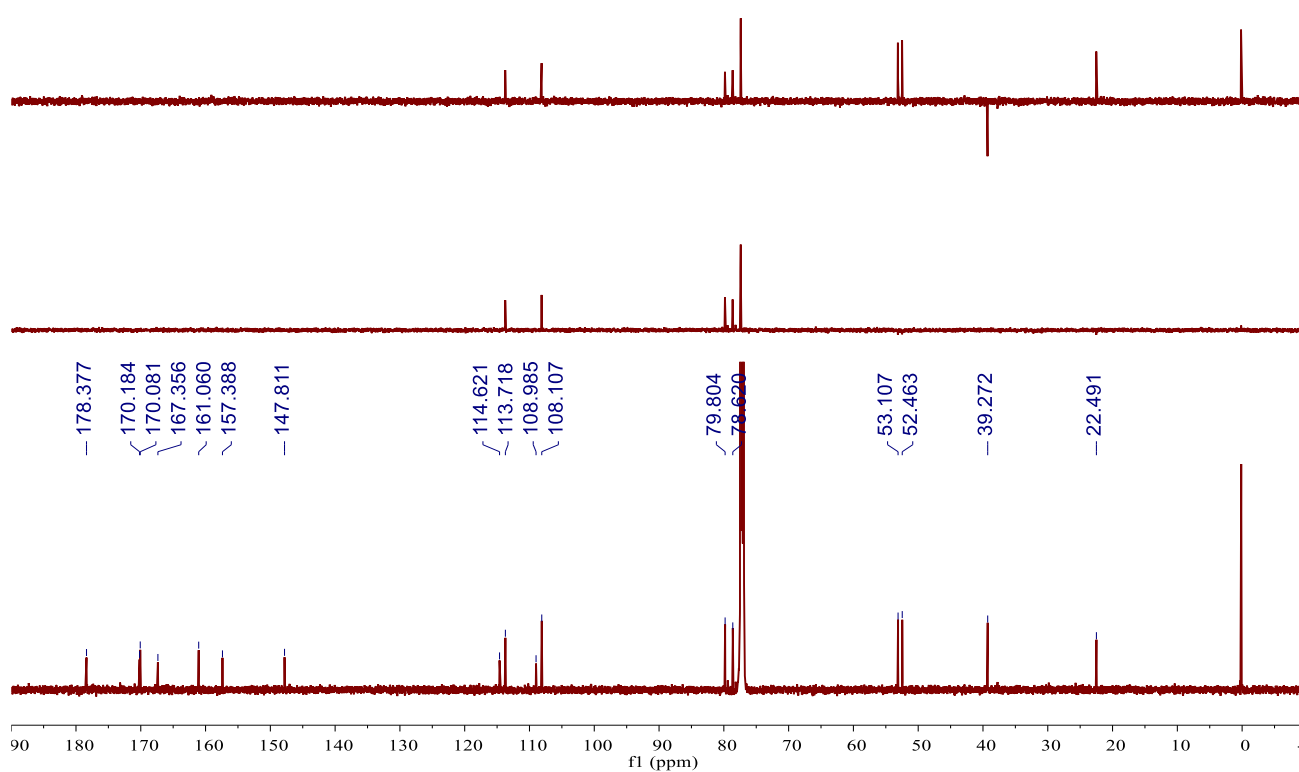

HSQC spectrum

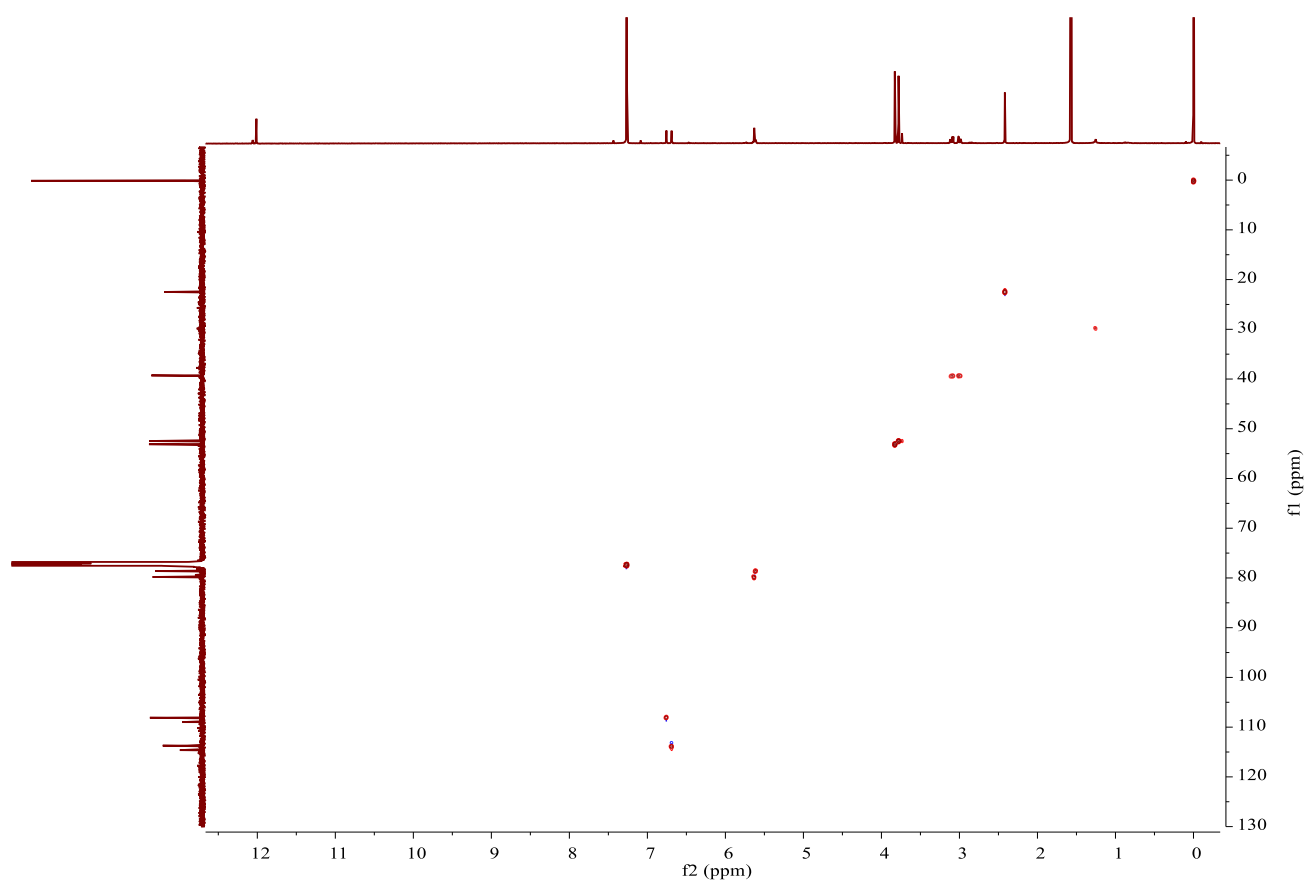

HMBC spectrum

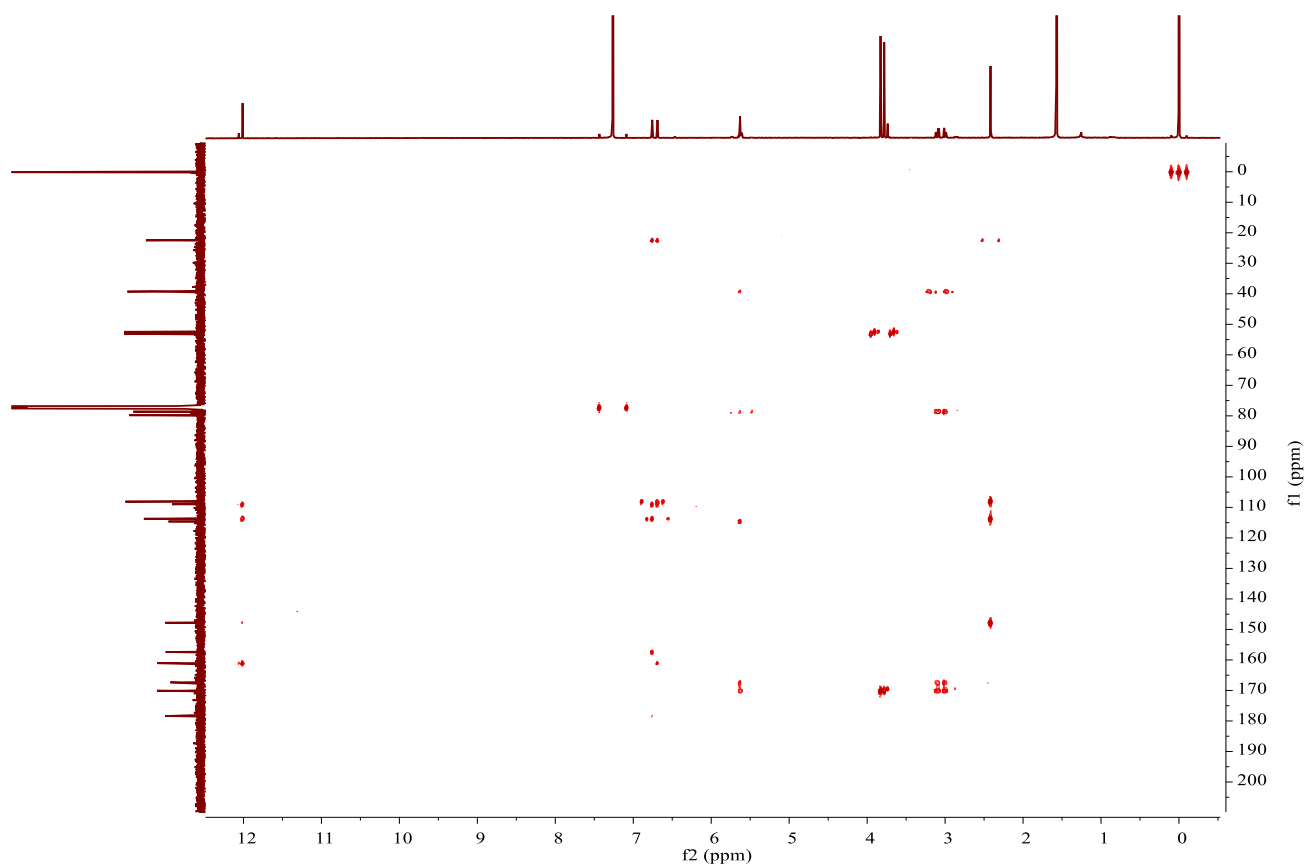

$^1\text{H}$ - $^1\text{H}$  COSY spectrum

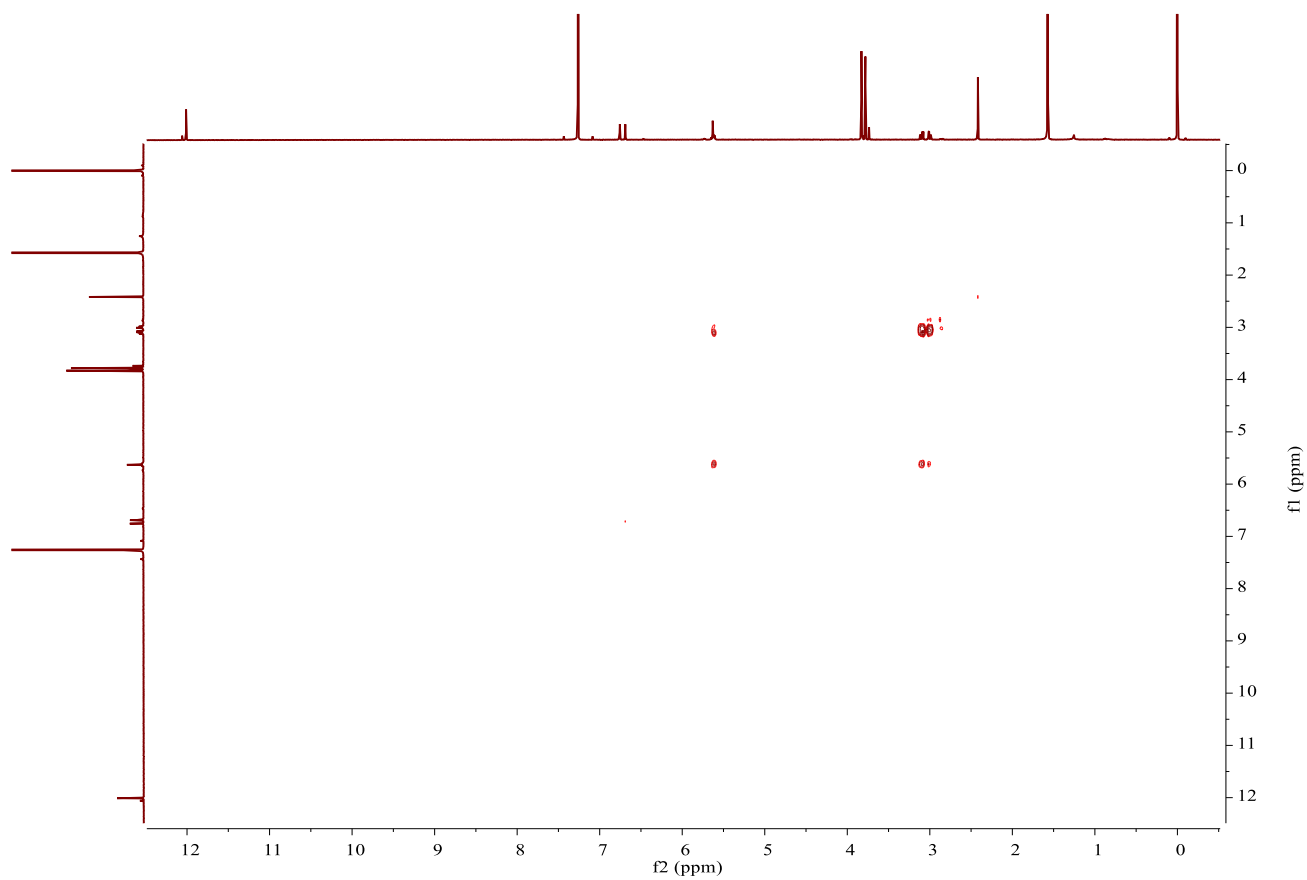



ROESY spectrum

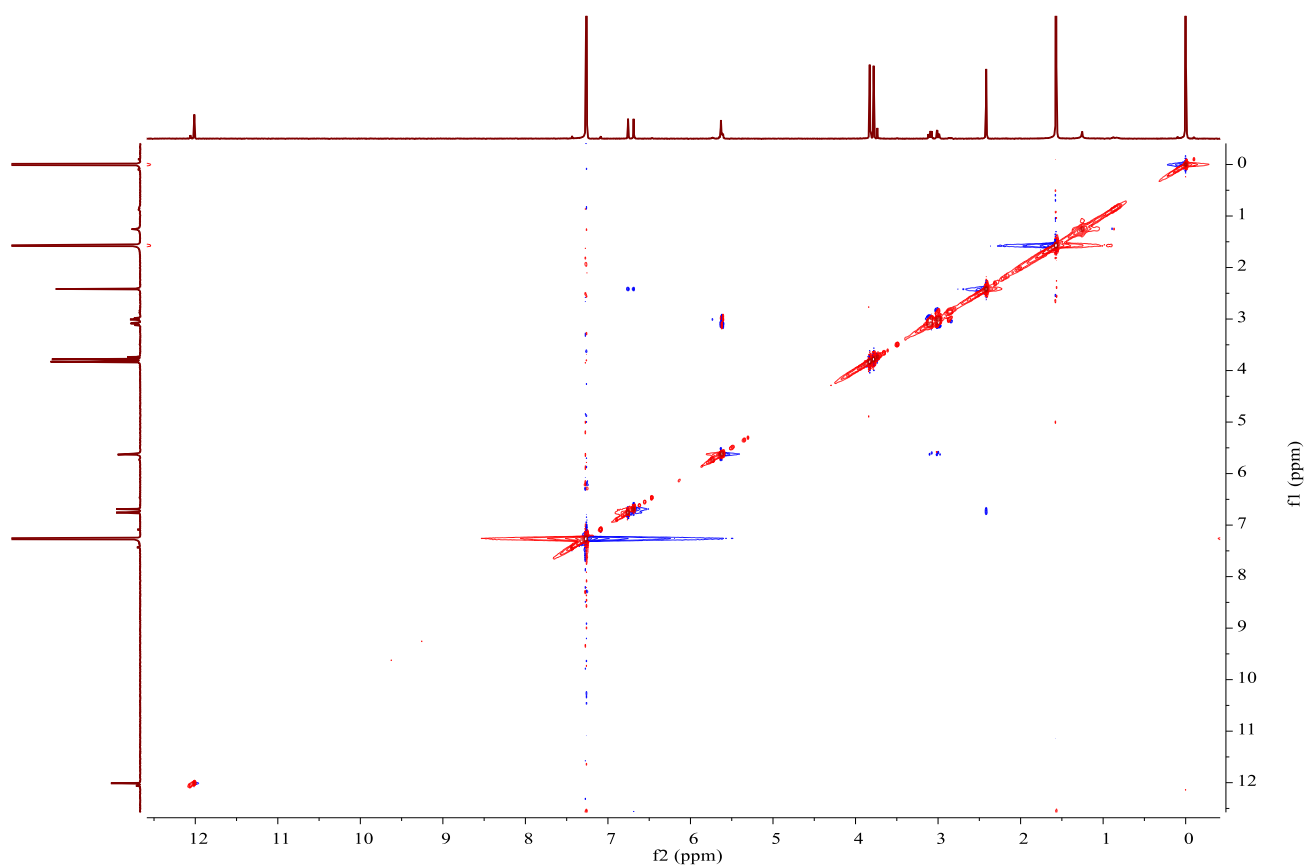

HRESIMS

T: FTMS + p ESI Full ms [150.0000-1100.0000]

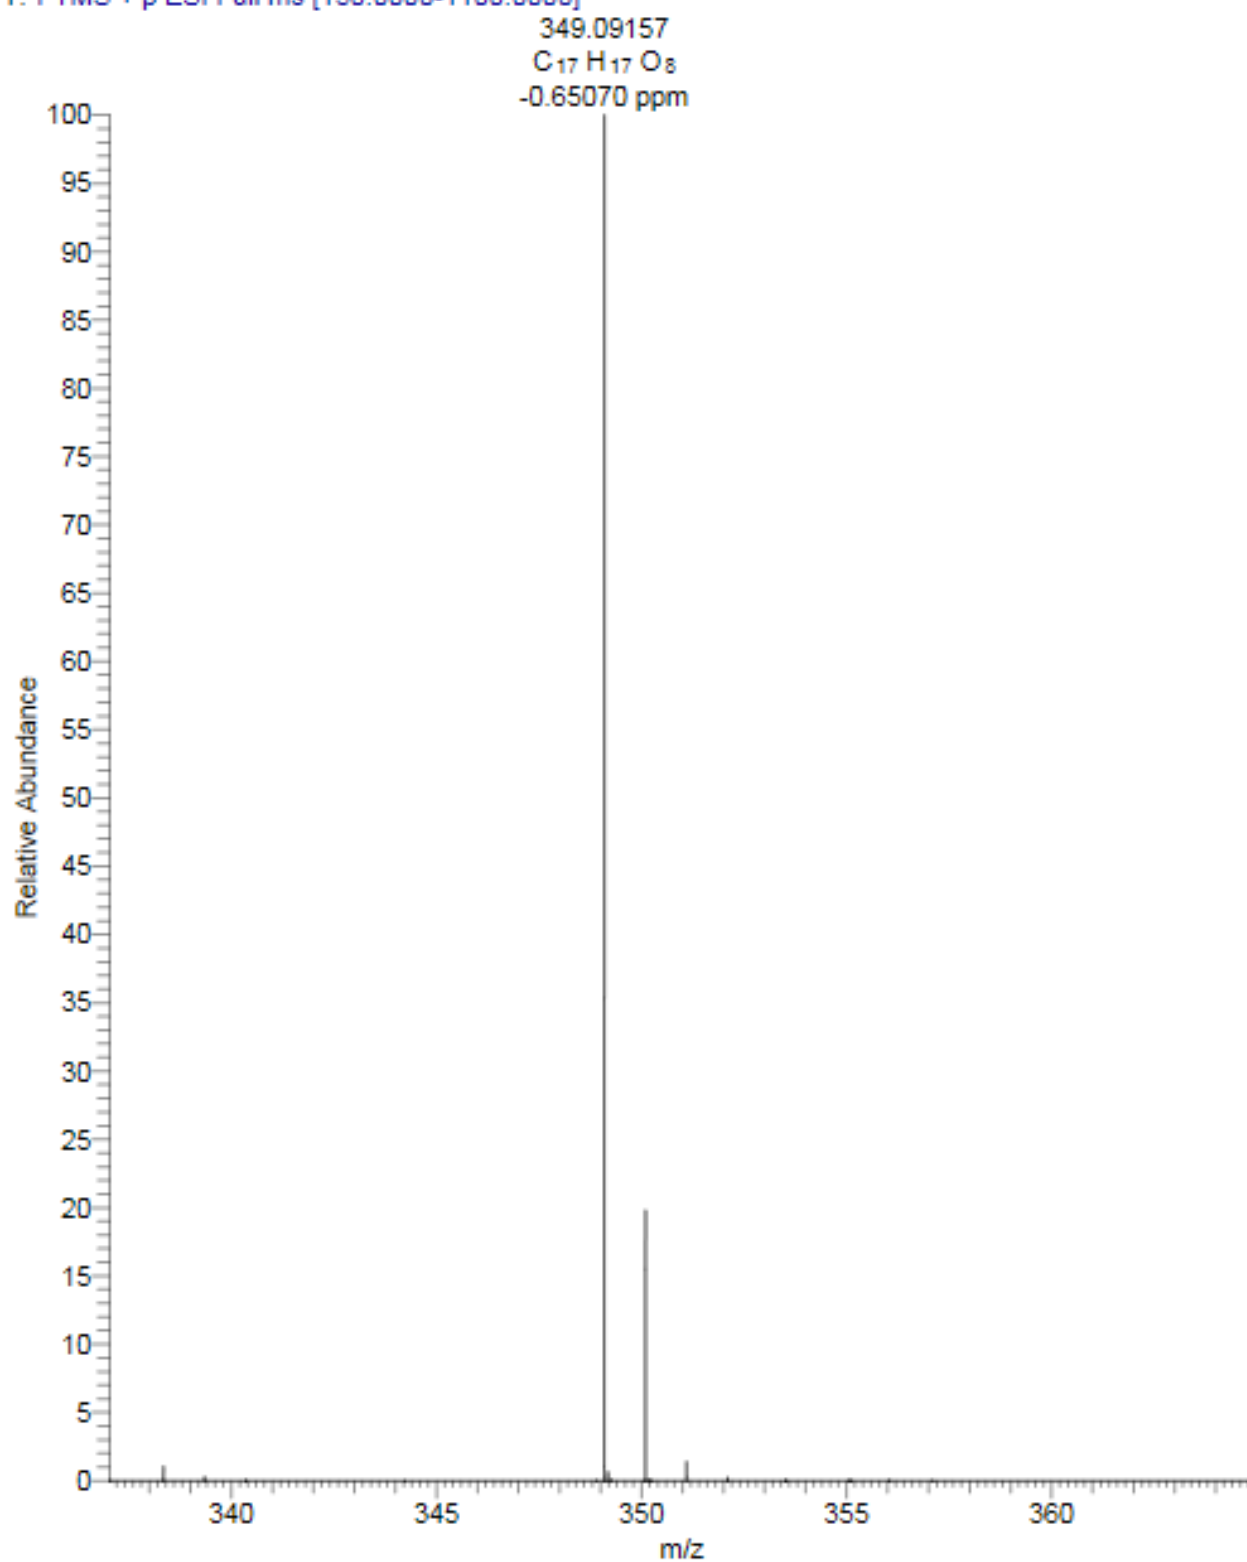

## CD spectra

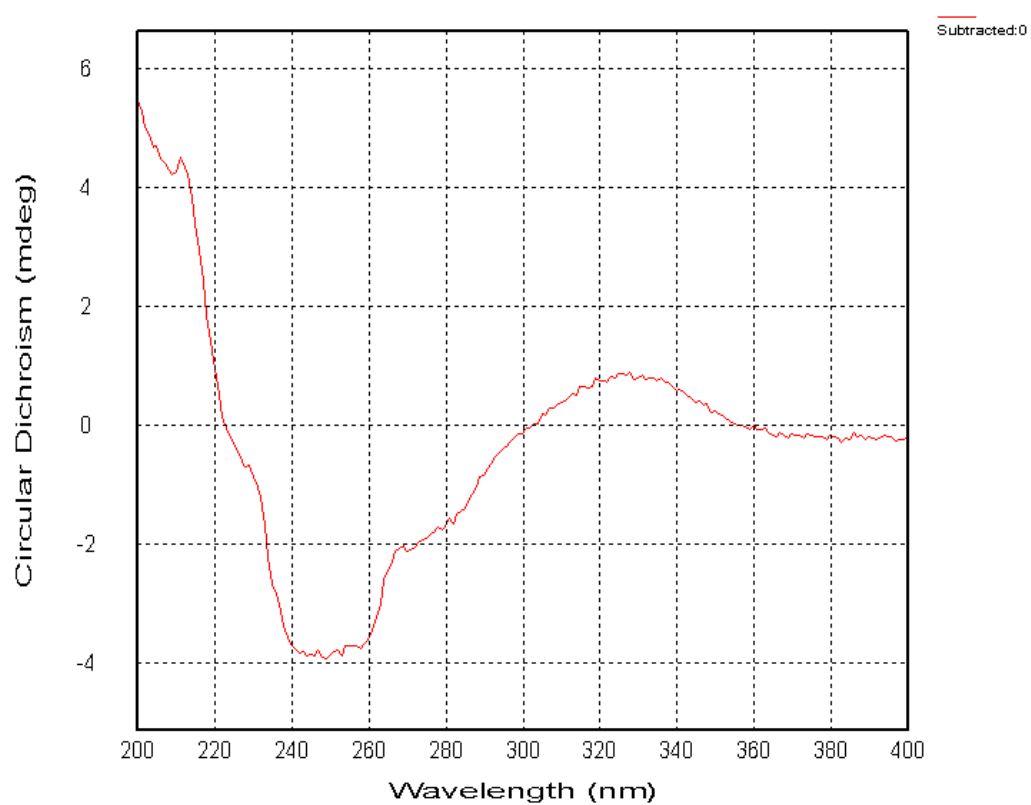

## S1.12 NMR, HRESIMS and CD spectra of bipolarithone C (12)

### $^1\text{H}$ NMR spectrum

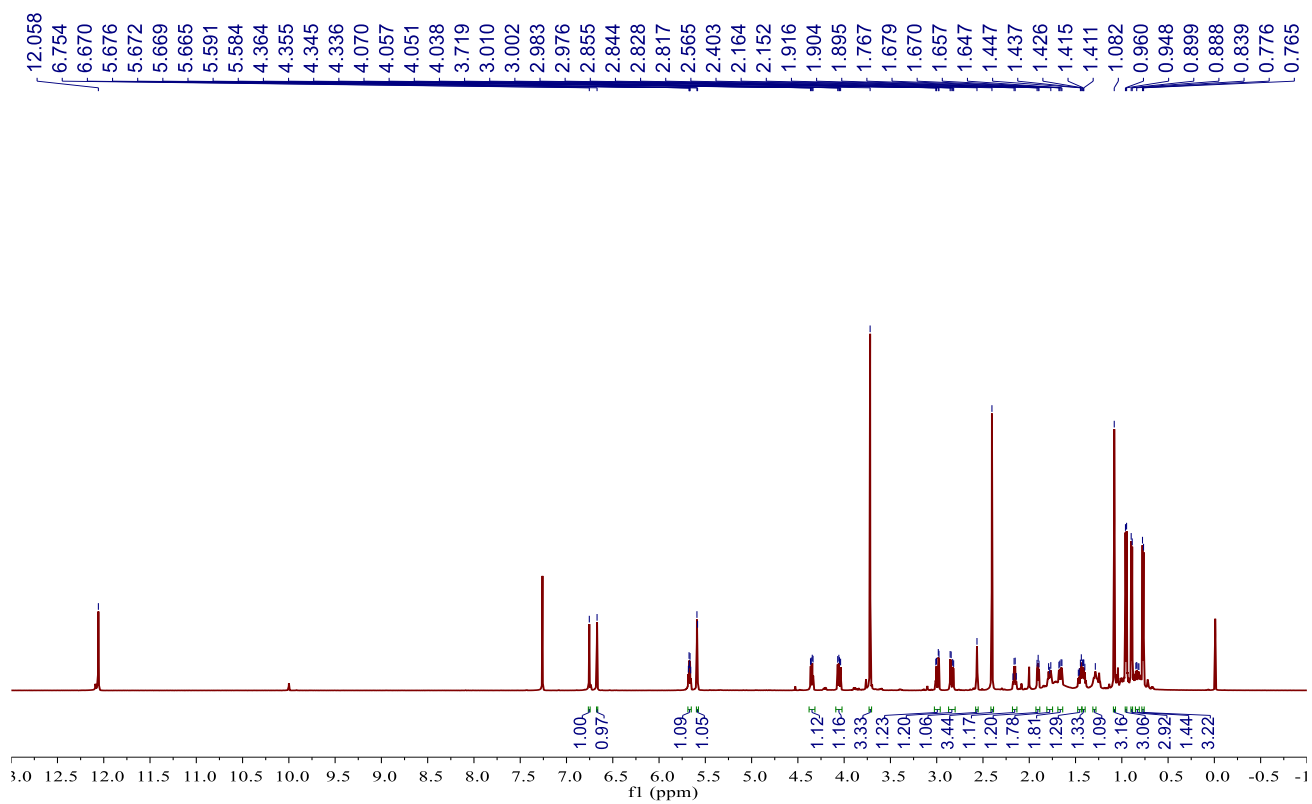

### $^{13}\text{C}$ NMR and DEPT spectra

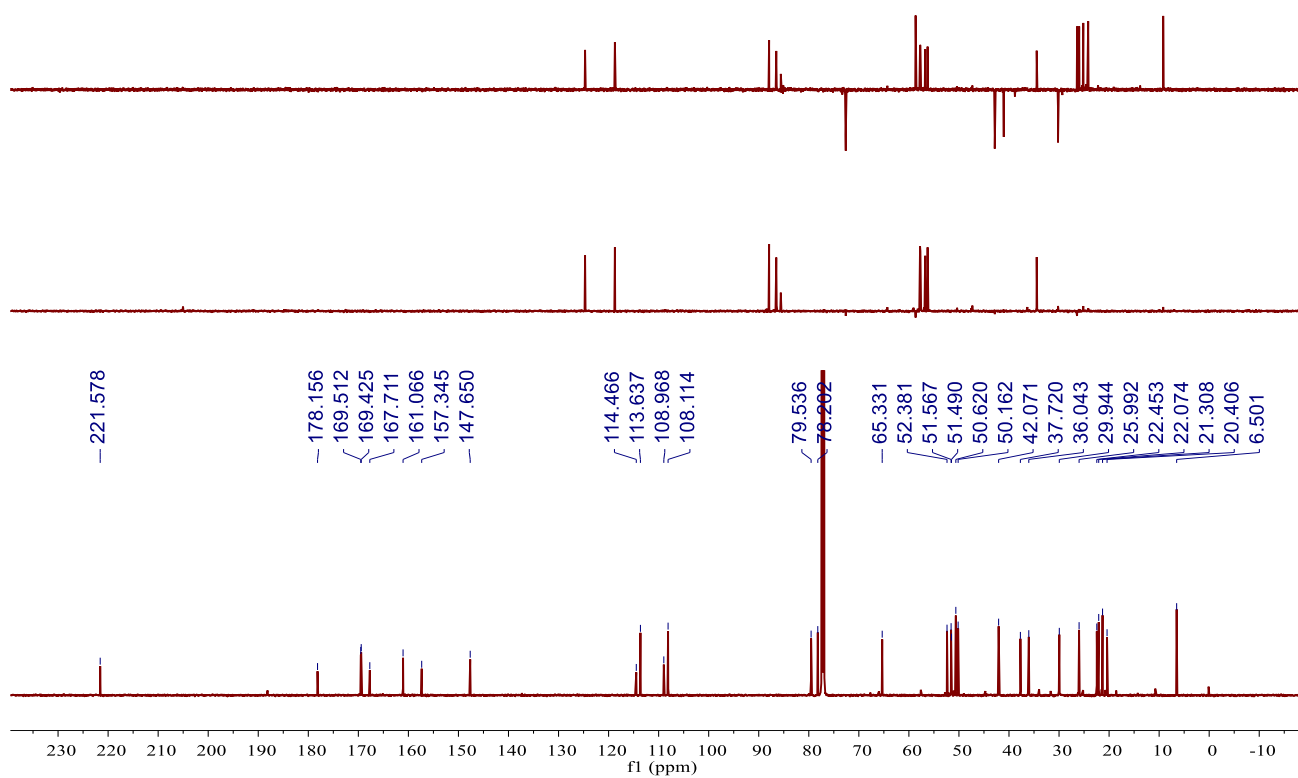

HSQC spectrum

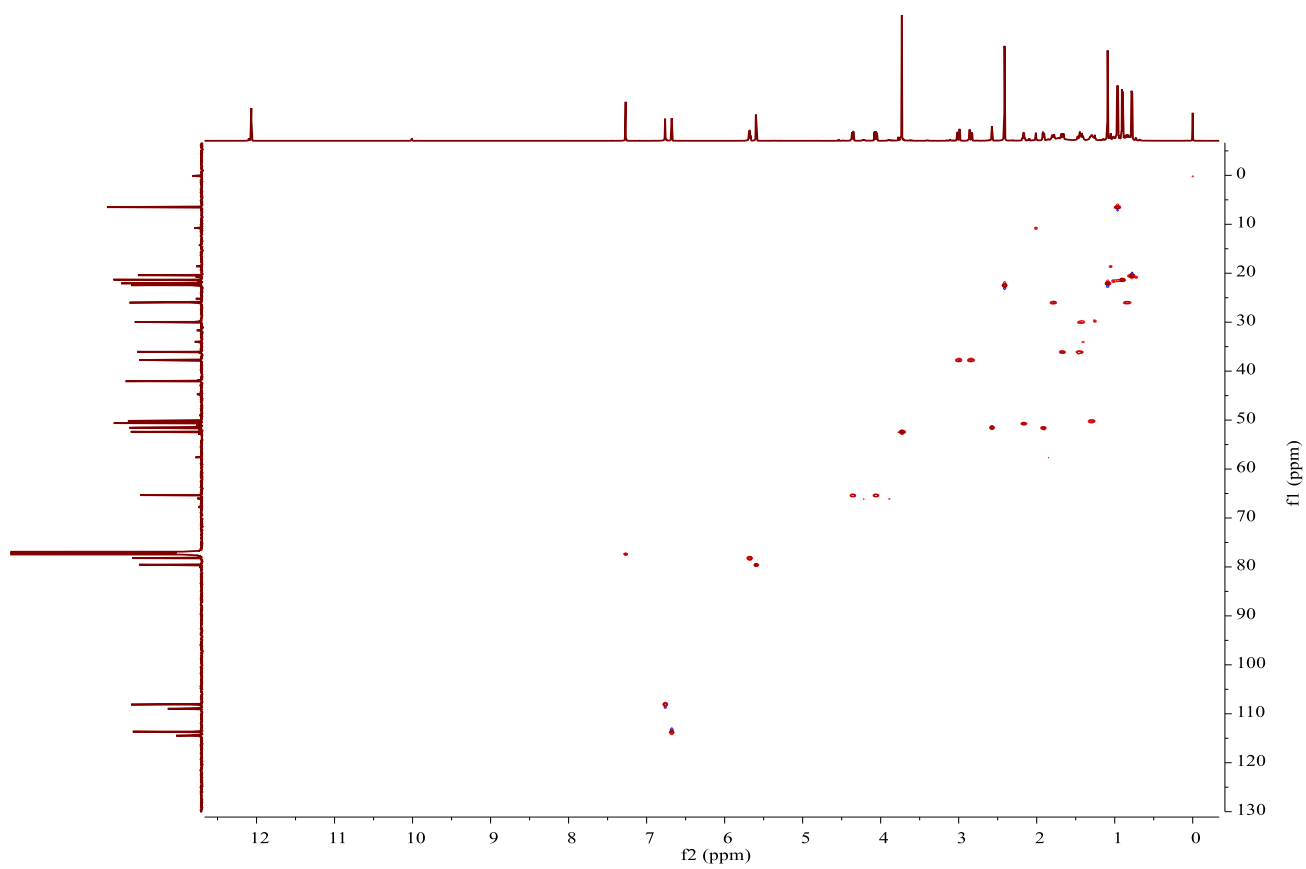

HMBC spectrum

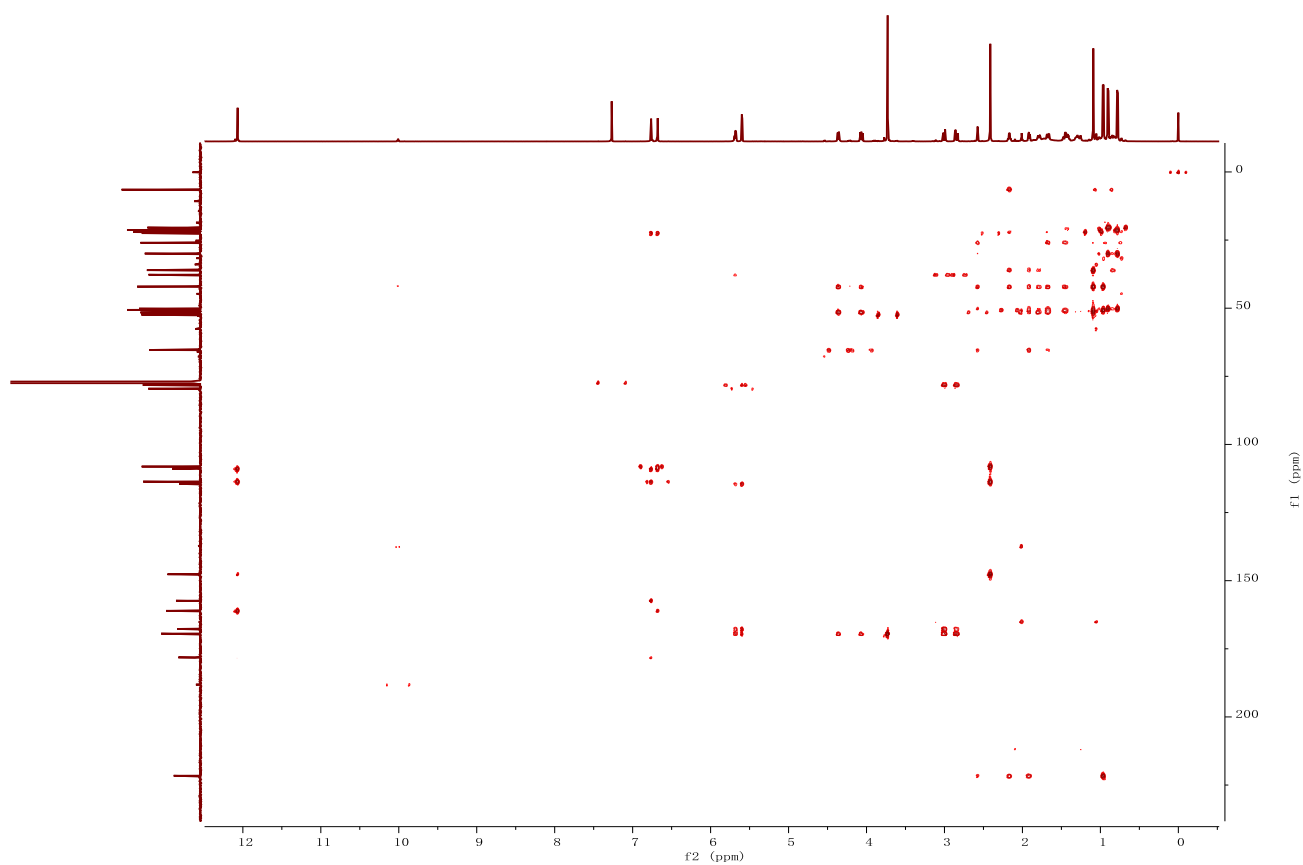

$^1\text{H}$ - $^1\text{H}$  COSY spectrum

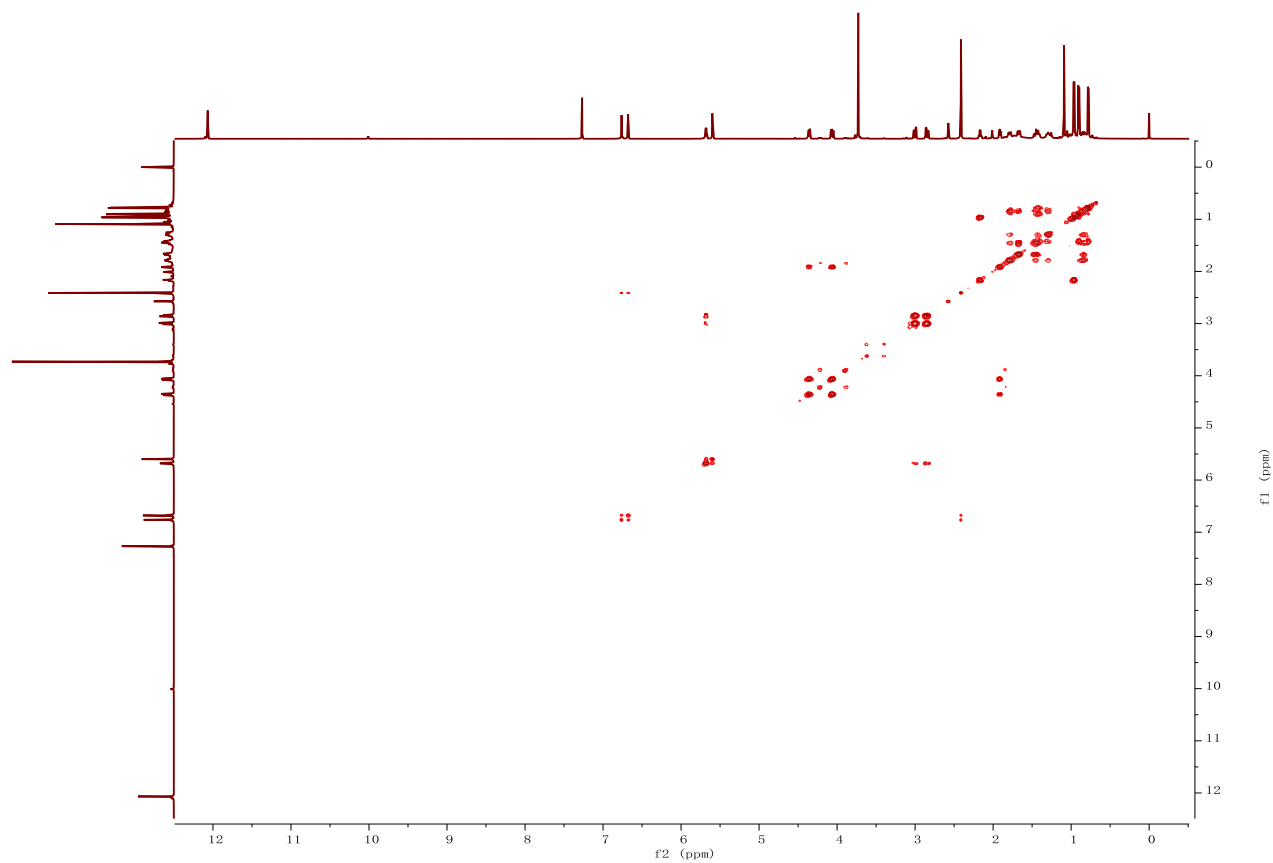

ROESY spectrum

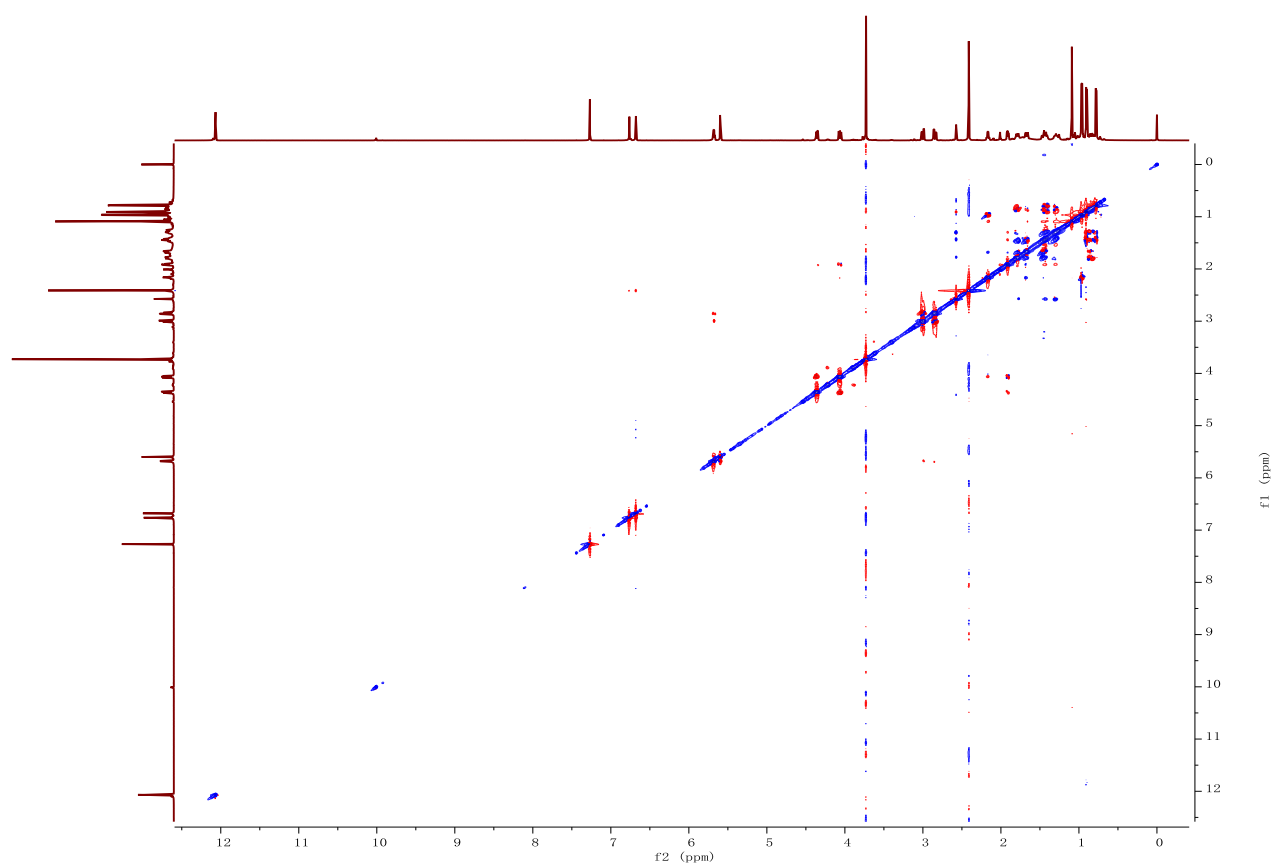

HRESIMS

T: FTMS + p ESI Full lock ms [150.0000-1100.0000]

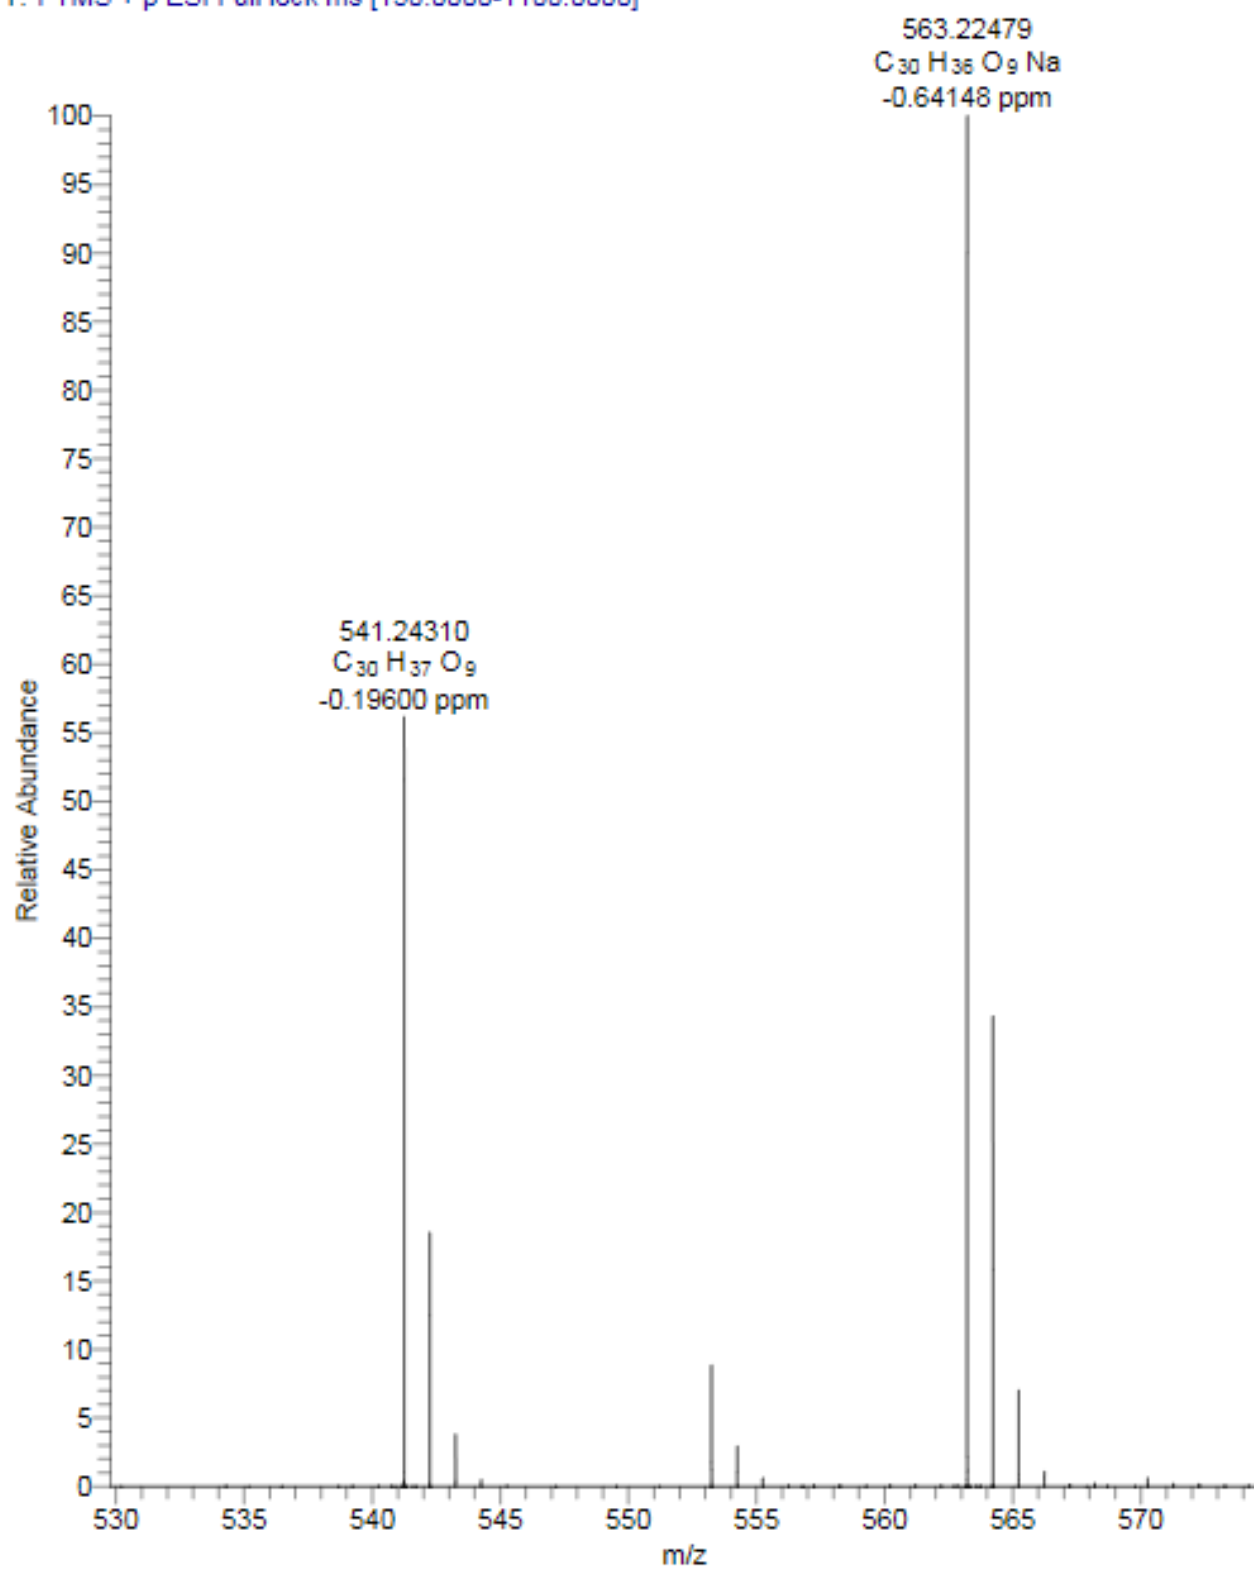



## CD spectra

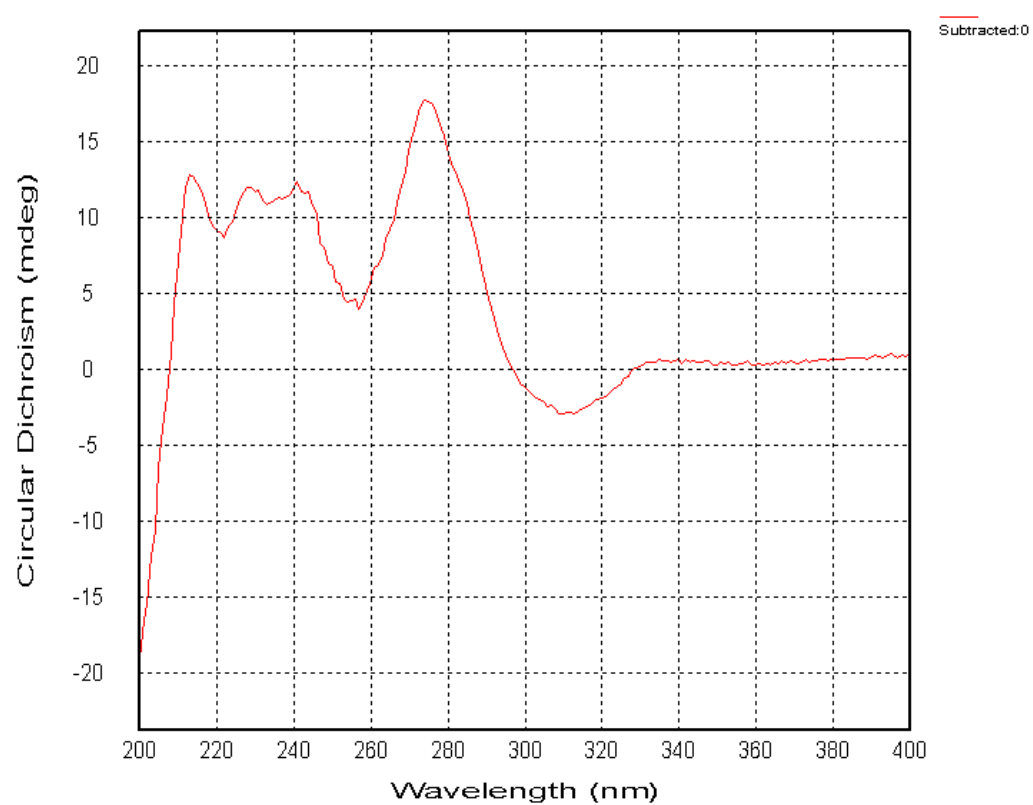

### S1.13 NMR, HRESIMS and CD spectra of bipolarithone D (13)

#### $^1\text{H}$ NMR spectrum

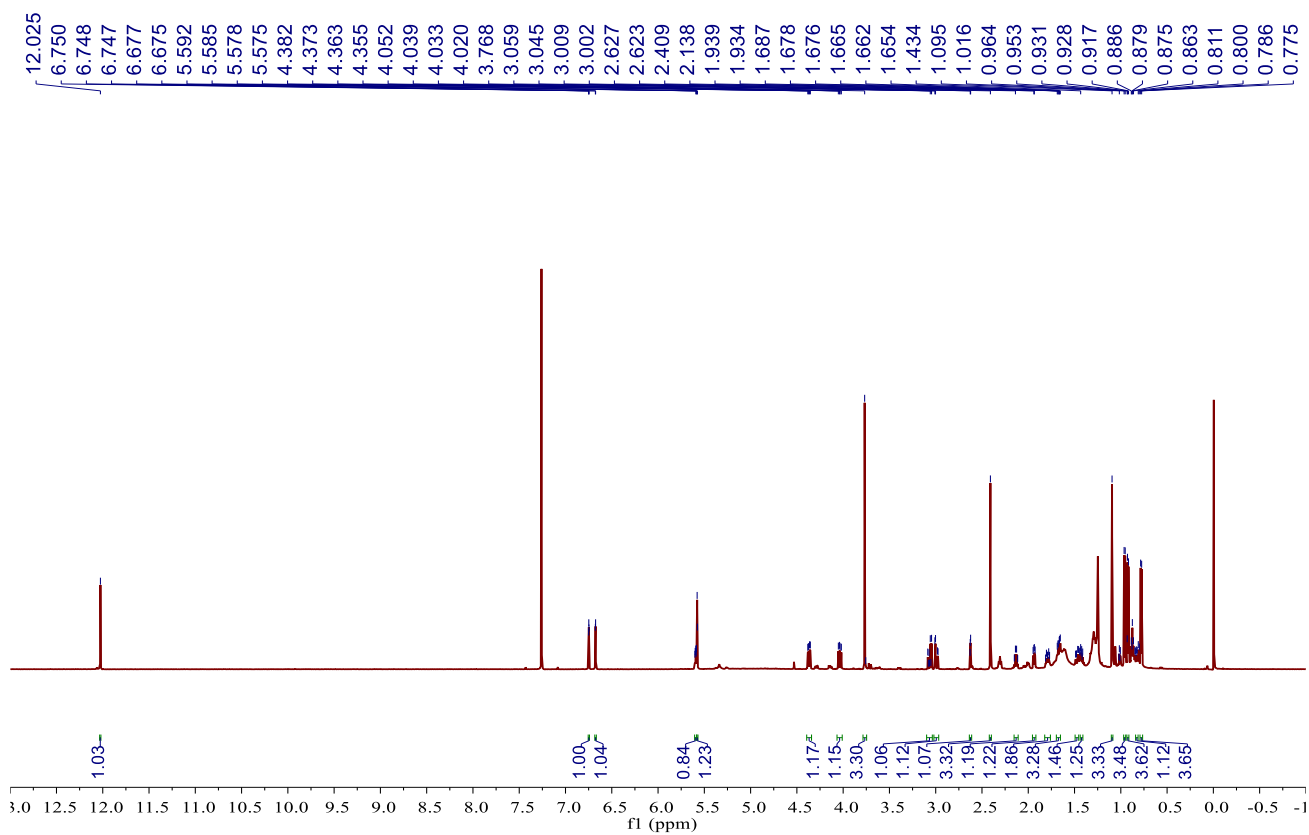

#### $^{13}\text{C}$ NMR and DEPT spectra

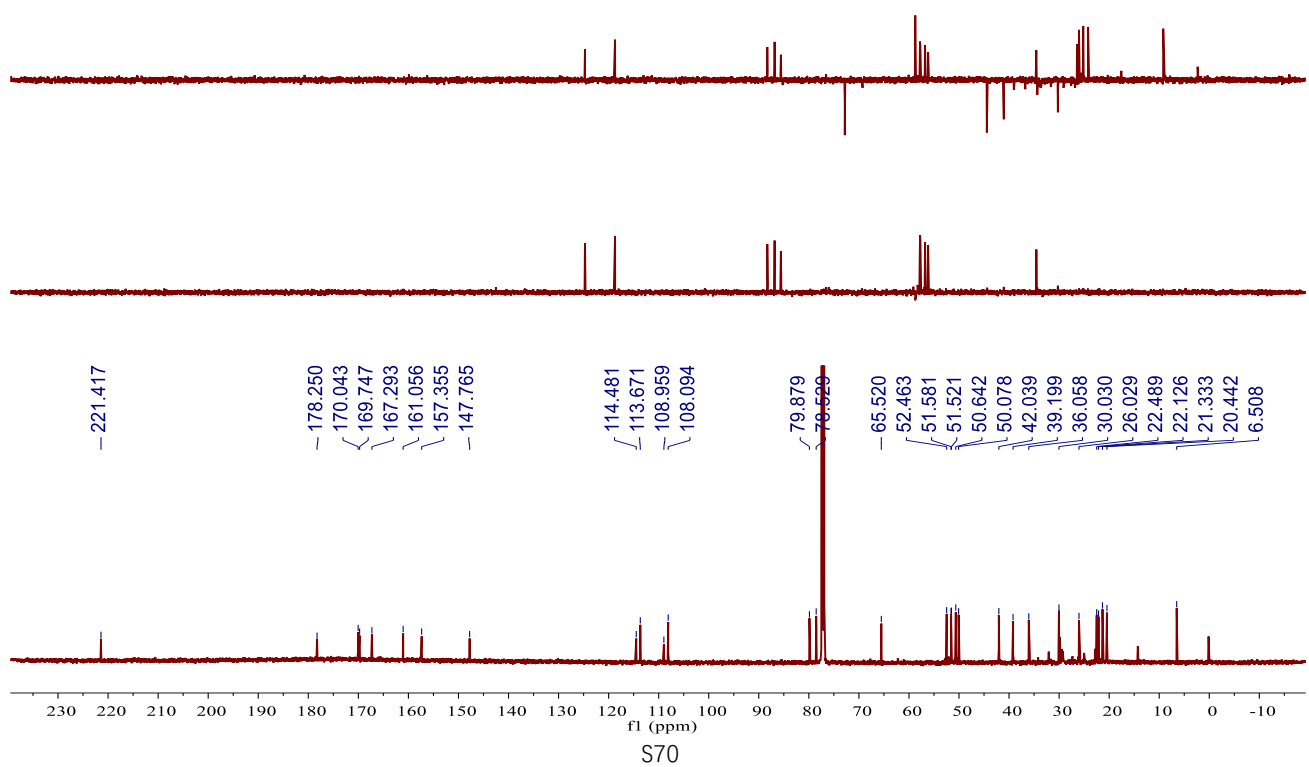

HSQC spectrum

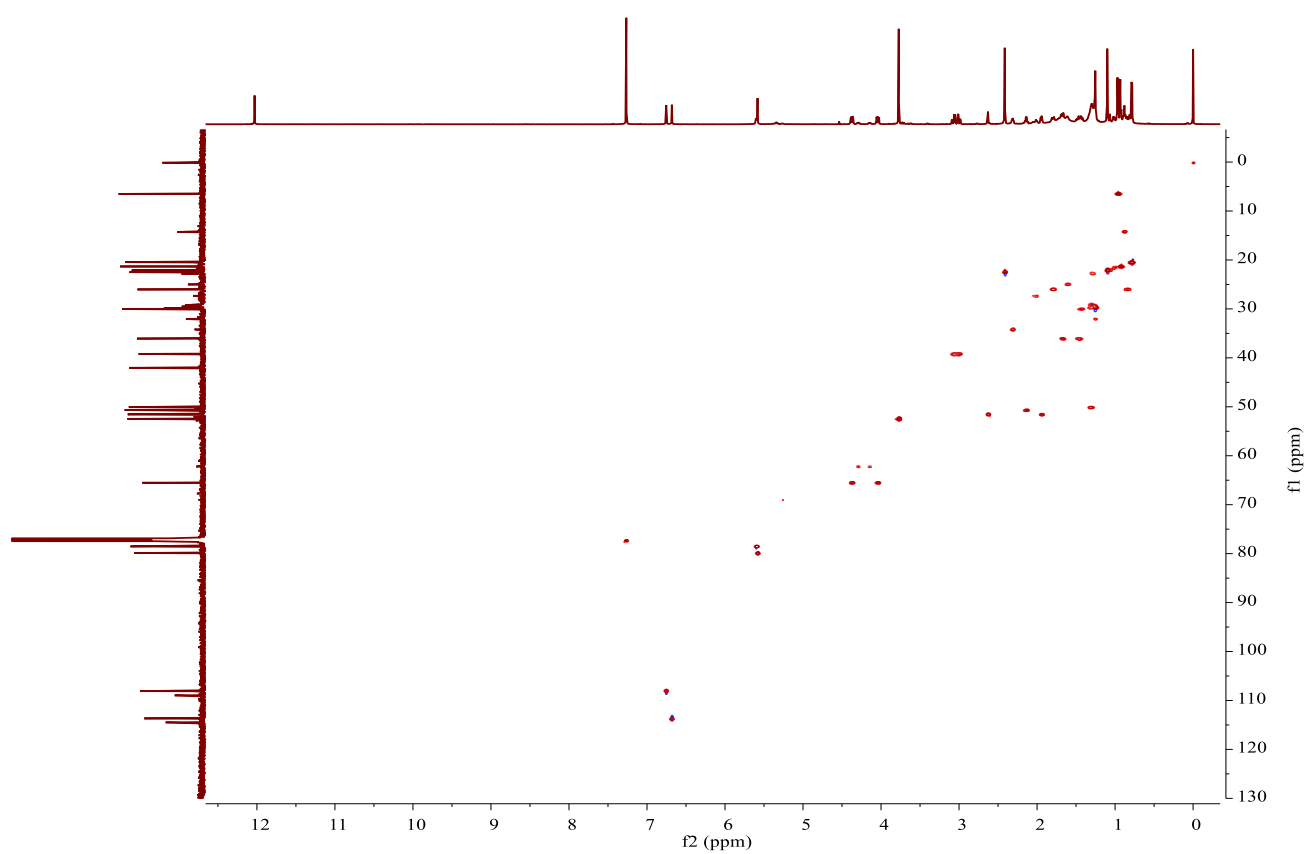

HMBC spectrum

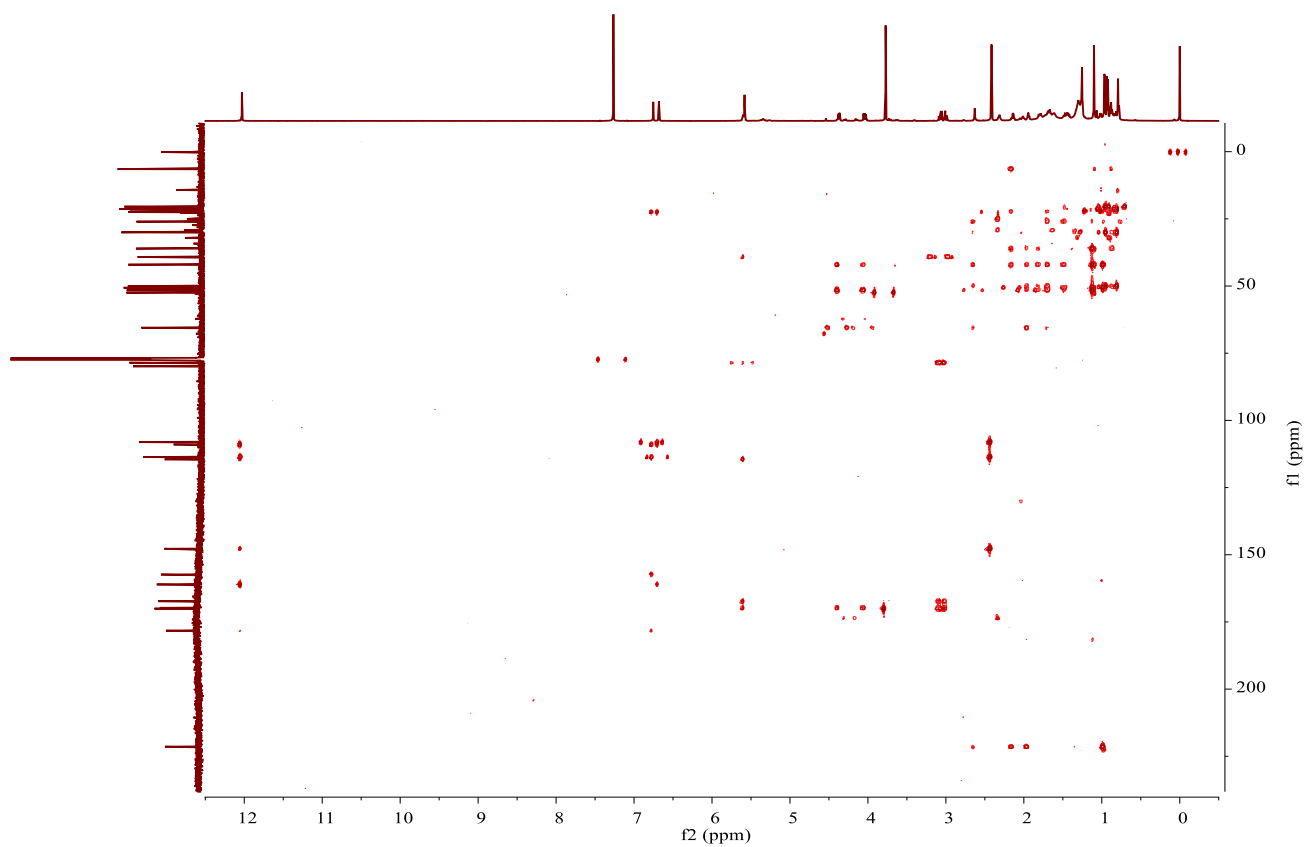

$^1\text{H}$ - $^1\text{H}$  COSY spectrum

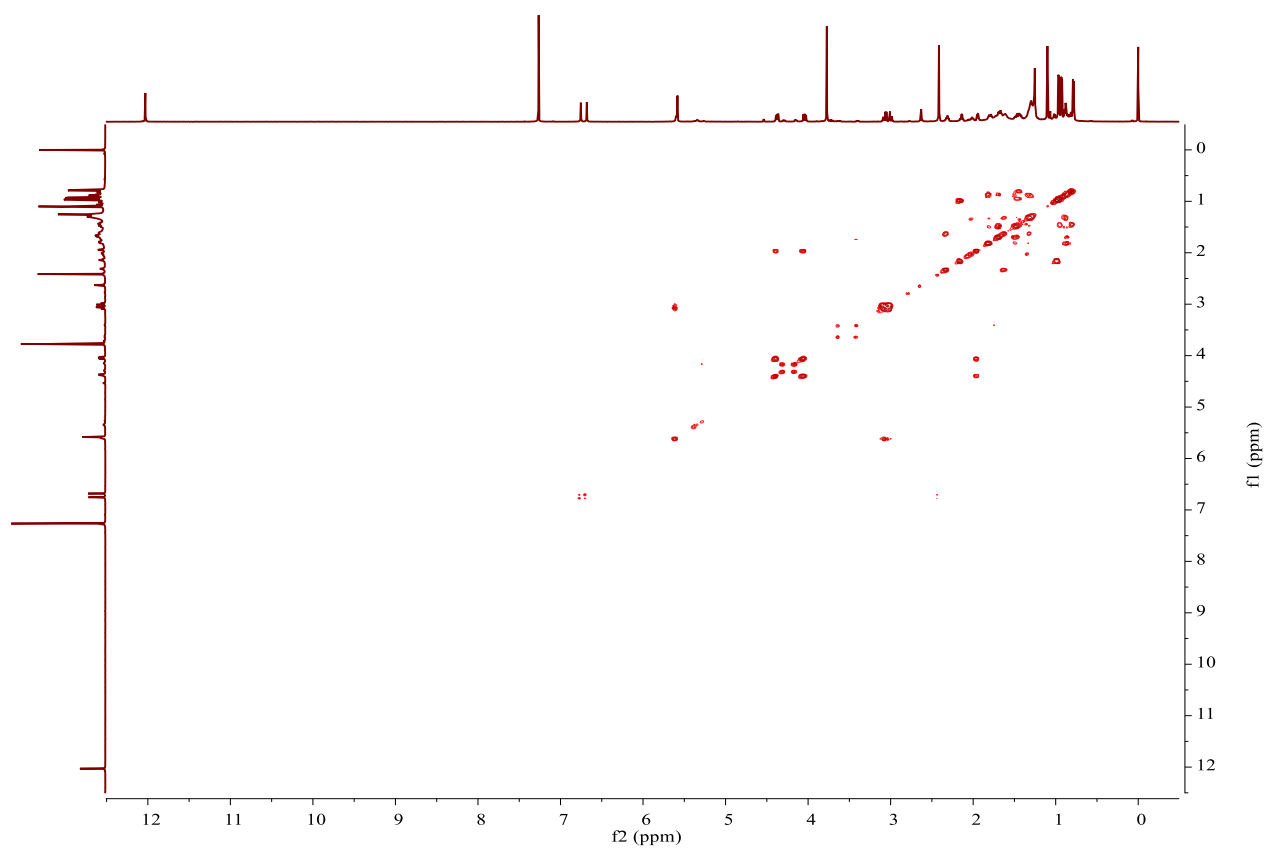

ROESY spectrum

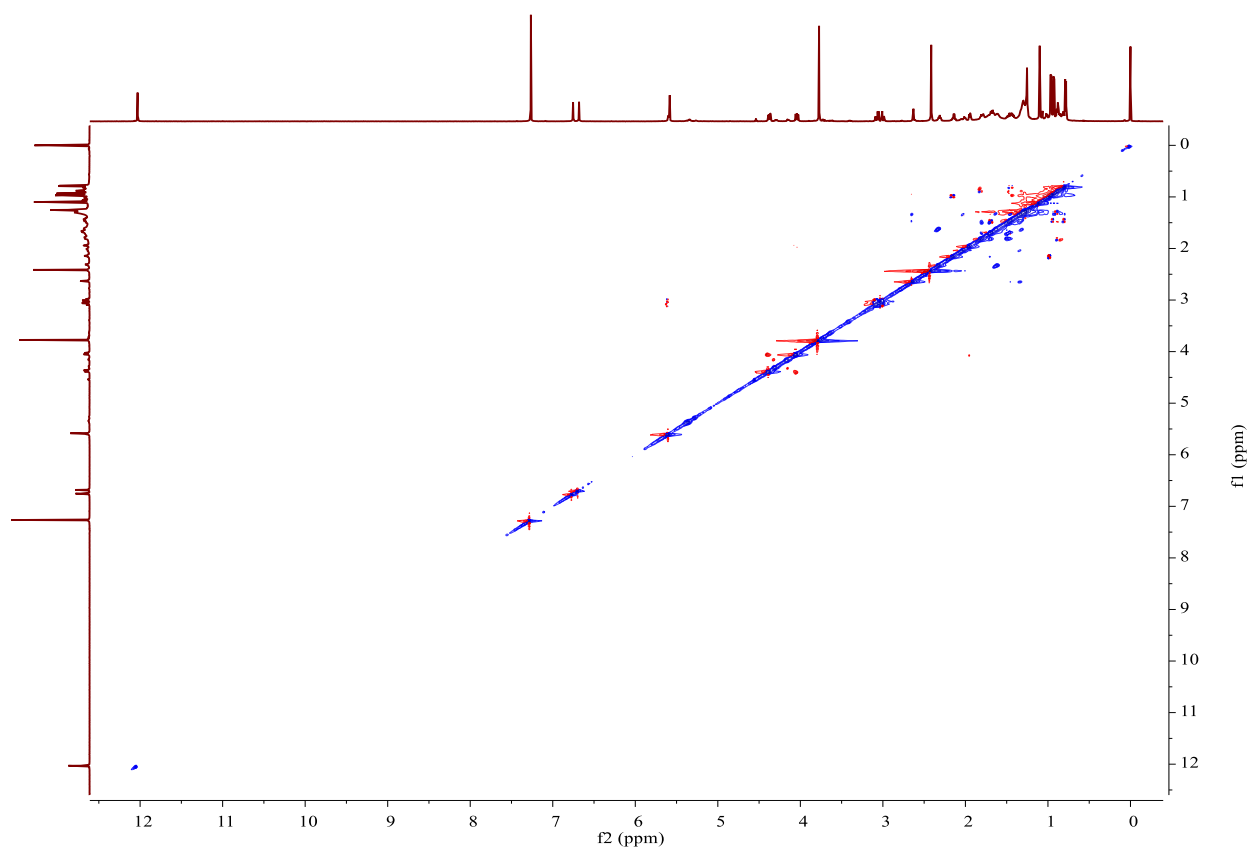

HRESIMS

T: FTMS + p ESI Full lock ms [150.0000-1100.0000]

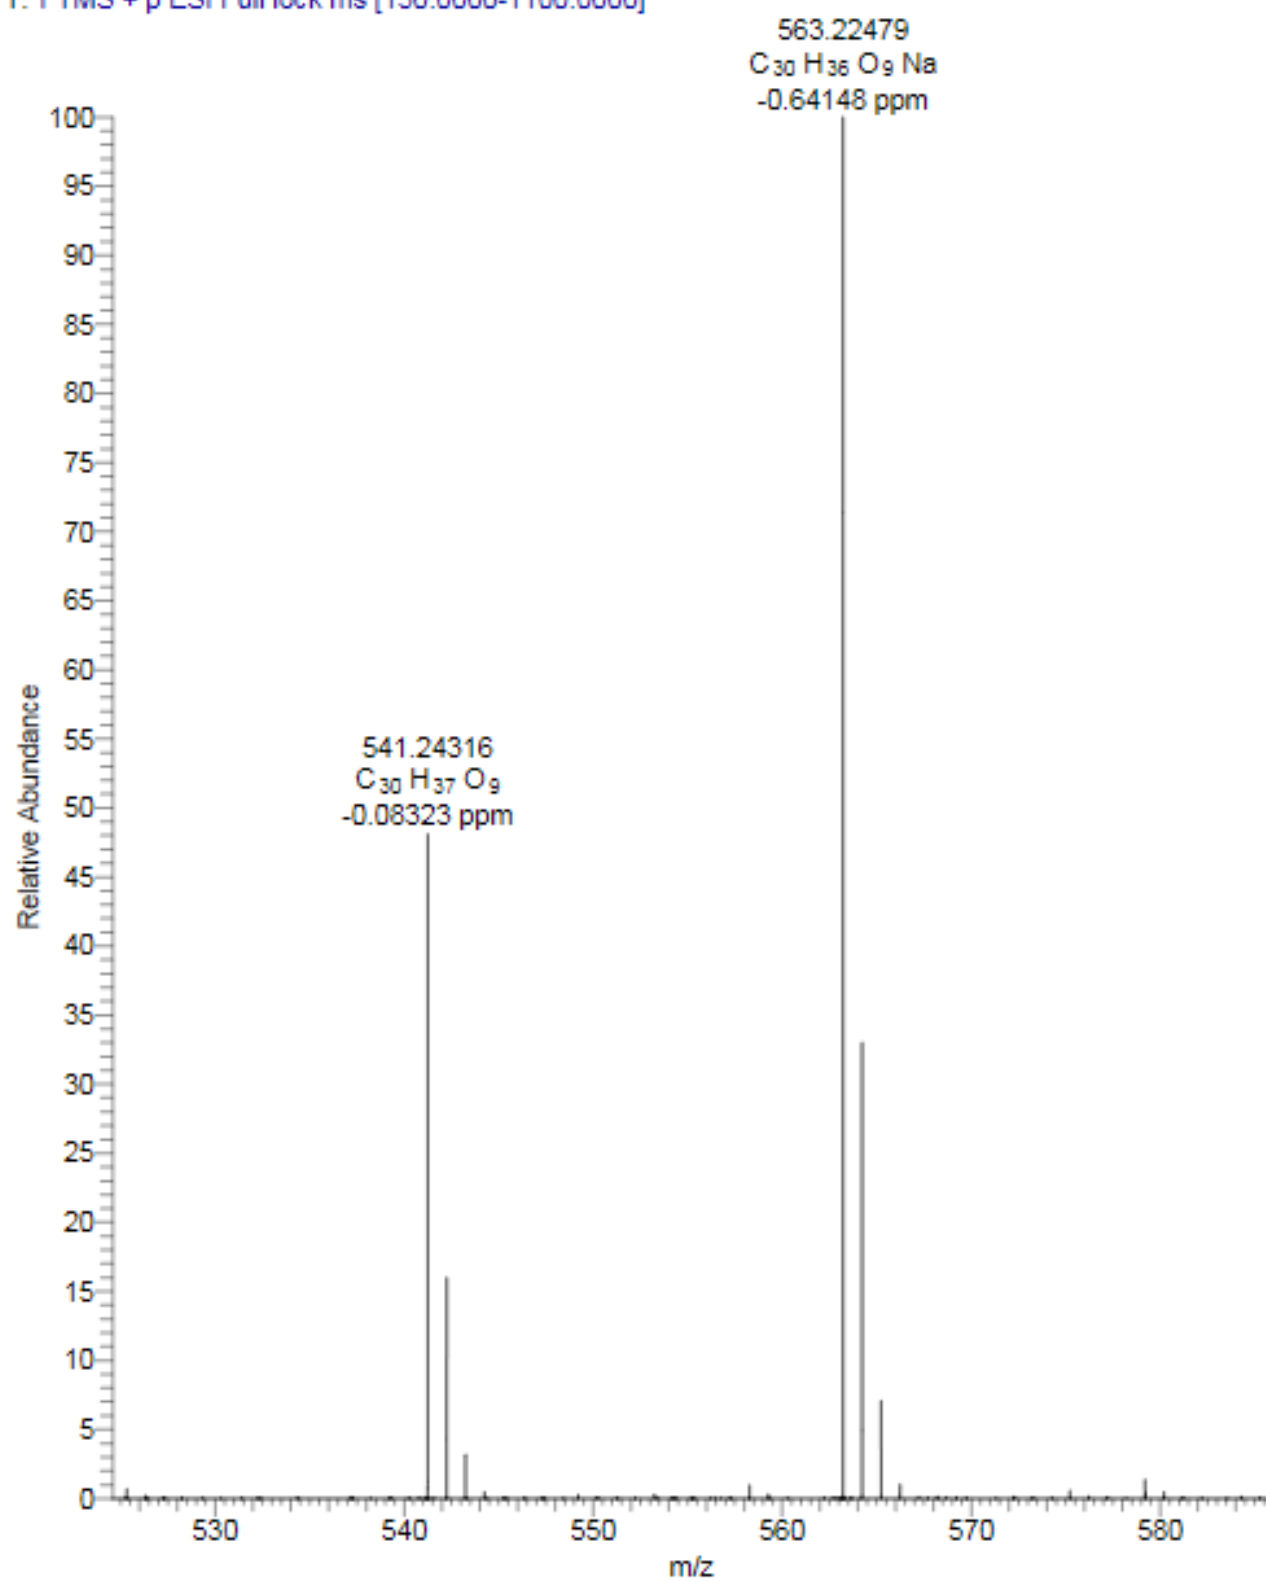

## CD spectra

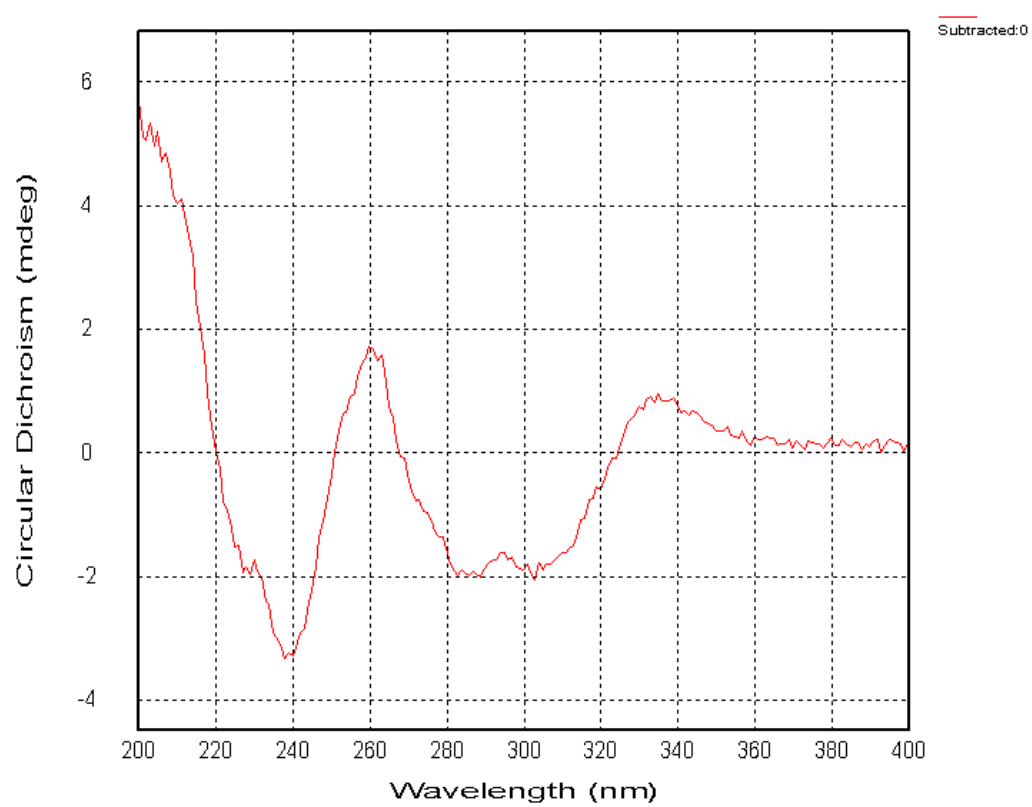

## Sections S2. Computational details

### S2.1. Computational details for bipolarisorokin C (**3**) (ECD)

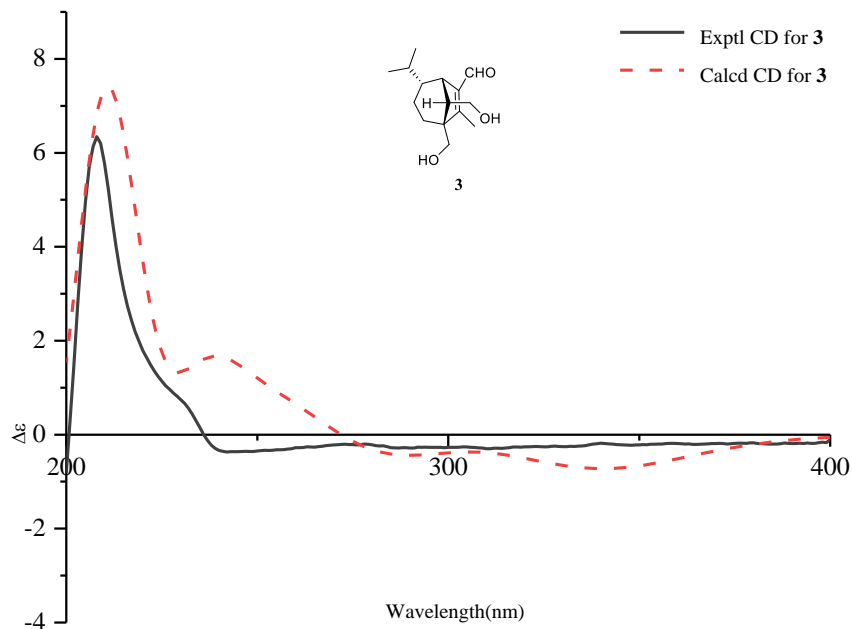

**Figure S1.** Calculated ECD spectra for **3** at the B3LYP/6-311G(d) level in methanol with IEFPCM model ( $\sigma = 0.35$  eV, UV shift 7 nm). Experimental CD spectra of **3** (black line) in MeOH.

**Table S1.** Energy analysis for conformers of **3A~3F** at B3LYP/6-31G(d) level in the gas phase

| Species   | $E'=E+ZPE$  | $E$         | $H$         | $G$         | $\Delta G$ | $\Delta E(\text{kcal/mol})$ | PE%    |
|-----------|-------------|-------------|-------------|-------------|------------|-----------------------------|--------|
| <b>3A</b> | -811.401389 | -811.382734 | -811.38179  | -811.445976 | 0.002106   | 1.321535                    | 6.80%  |
| <b>3B</b> | -811.403156 | -811.384823 | -811.383879 | -811.447234 | 0.000848   | 0.532128                    | 25.79% |
| <b>3C</b> | -811.394306 | -811.375171 | -811.374227 | -811.439445 | 0.008637   | 5.4198                      | 0.01%  |
| <b>3D</b> | -811.400708 | -811.382174 | -811.38123  | -811.445153 | 0.002929   | 1.837975                    | 2.84%  |
| <b>3E</b> | -811.403984 | -811.385629 | -811.384685 | -811.448082 | 0          | 0                           | 63.34% |
| <b>3F</b> | -811.400129 | -811.381683 | -811.380739 | -811.444362 | 0.00372    | 2.334335                    | 1.23%  |

$E$ ,  $E'$ ,  $H$ ,  $G$ : total energy, total energy with zero point energy (ZPE), enthalpy, and Gibbs free energy



**Figure S2.** Main conformers of **3** in ECD

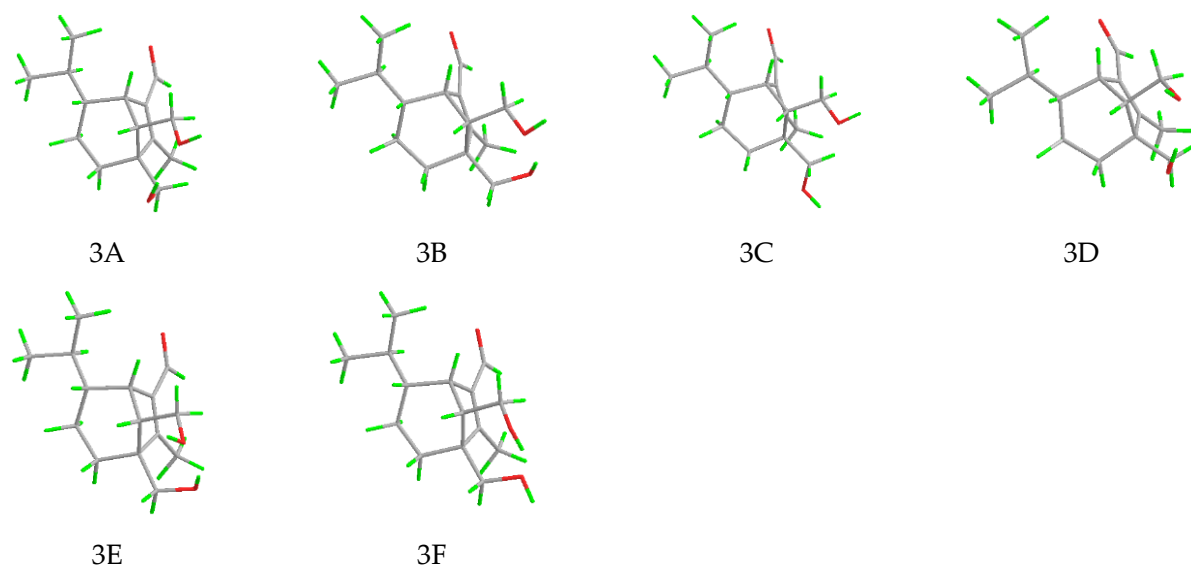

## S2.2. Computational details for bipolarisorokin G (**7**) (ECD)

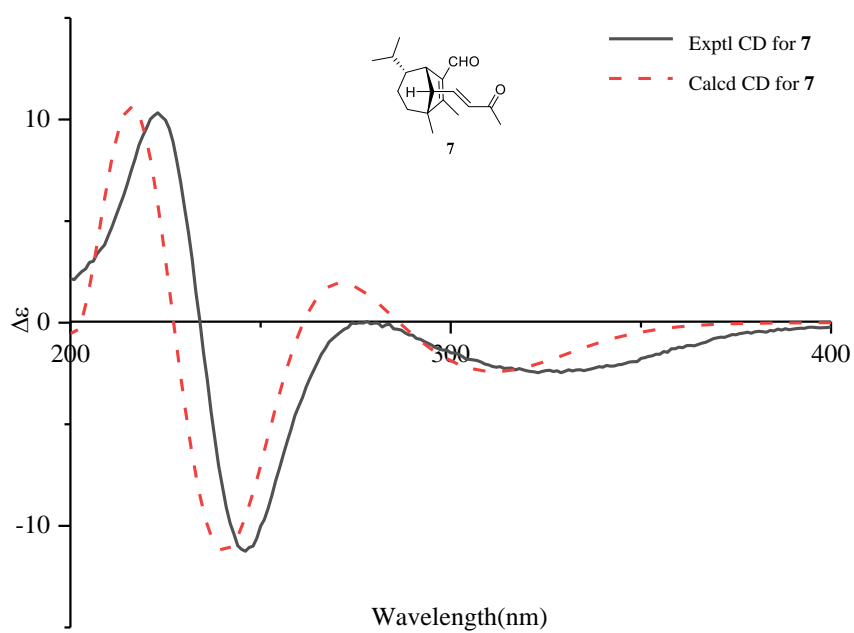

**Figure S3.** Calculated ECD spectra for **7** at the B3LYP/6-311G(d) level in methanol with IEFPCM model ( $\sigma$  = 0.30 eV, UV shift -21 nm). Experimental CD spectra of **7** (black line) in MeOH.

**Table S2.** Energy analysis for conformers of **7A~7K** at B3LYP/6-31G(d) level in the gas phase

| Species   | $E'=E+ZPE$  | $E$         | $H$         | $G$         | $\Delta G$ | $\Delta E(\text{kcal/mol})$ | $PE\%$ |
|-----------|-------------|-------------|-------------|-------------|------------|-----------------------------|--------|
| <b>7A</b> | -851.689303 | -851.667934 | -851.66699  | -851.738756 | 0.000753   | 0.472515                    | 23.63% |
| <b>7B</b> | -851.689337 | -851.668042 | -851.667098 | -851.738542 | 0.000967   | 0.606802                    | 18.83% |
| <b>7C</b> | -851.689897 | -851.668478 | -851.667534 | -851.739509 | 0          | 0                           | 52.48% |
| <b>7D</b> | -851.687229 | -851.66598  | -851.665036 | -851.736267 | 0.003242   | 2.034386                    | 1.69%  |
| <b>7E</b> | -851.685214 | -851.663817 | -851.662873 | -851.735376 | 0.004133   | 2.593497                    | 0.66%  |
| <b>7F</b> | -851.684986 | -851.663557 | -851.662612 | -851.734821 | 0.004688   | 2.941765                    | 0.36%  |
| <b>7G</b> | -851.685209 | -851.663911 | -851.662967 | -851.734125 | 0.005384   | 3.378511                    | 0.17%  |
| <b>7H</b> | -851.686185 | -851.665011 | -851.664067 | -851.73516  | 0.004349   | 2.729039                    | 0.52%  |
| <b>7I</b> | -851.685802 | -851.664542 | -851.663598 | -851.73505  | 0.004459   | 2.798065                    | 0.47%  |
| <b>7J</b> | -851.685847 | -851.664456 | -851.663512 | -851.735092 | 0.004417   | 2.771709                    | 0.49%  |
| <b>7K</b> | -851.685504 | -851.664035 | -851.663091 | -851.735425 | 0.004084   | 2.562749                    | 0.69%  |

$E$ ,  $E'$ ,  $H$ ,  $G$ : total energy, total energy with zero point energy ( $ZPE$ ), enthalpy, and Gibbs free energy

**Figure S4.** Main conformers of **7** in ECD

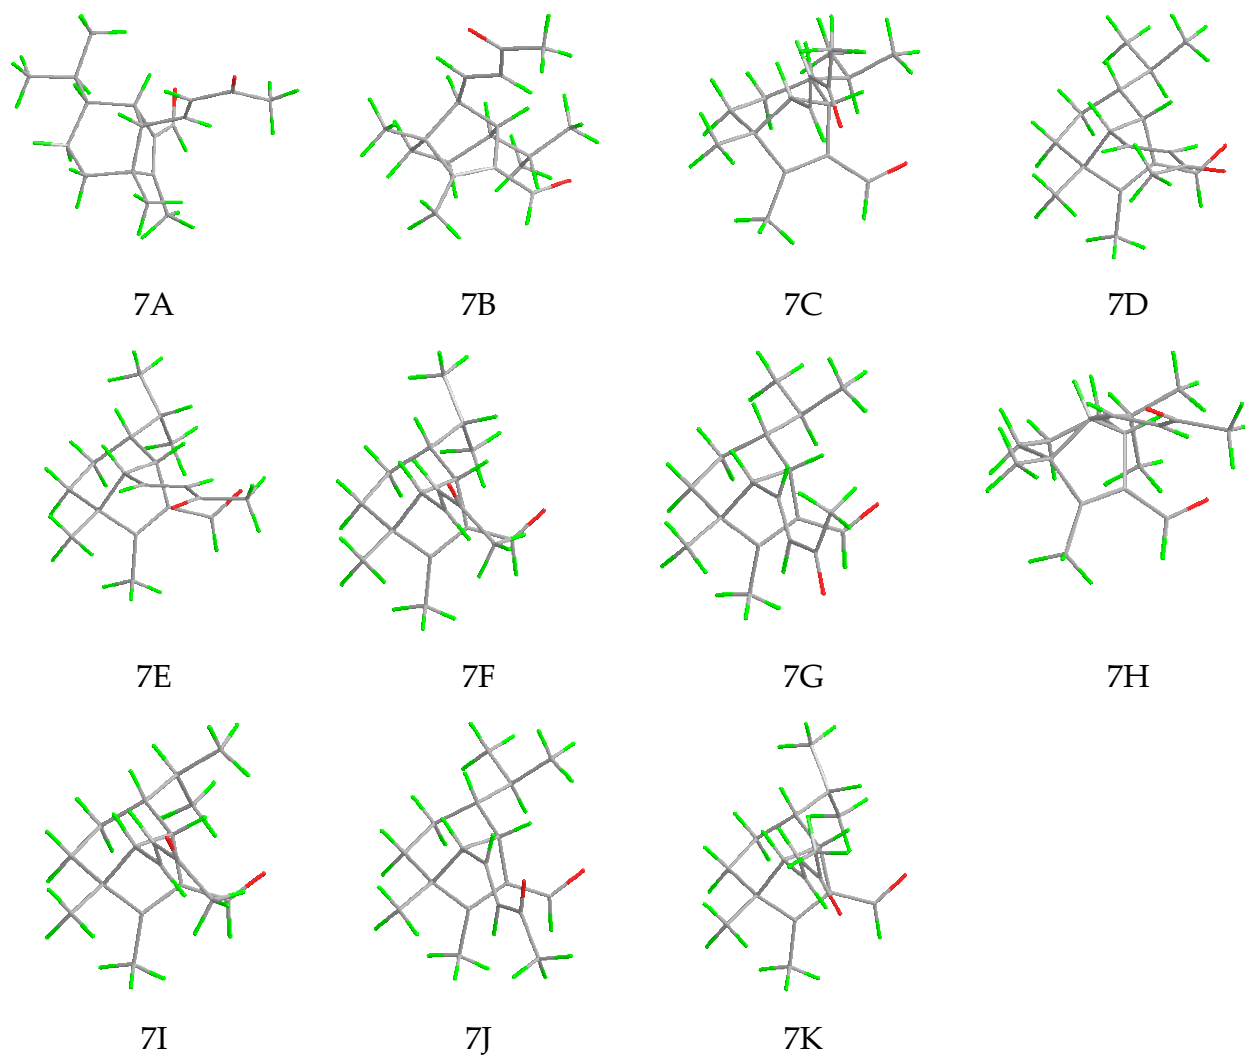

### S2.3. Computational details for bipolarithone A (**10**) (ECD)

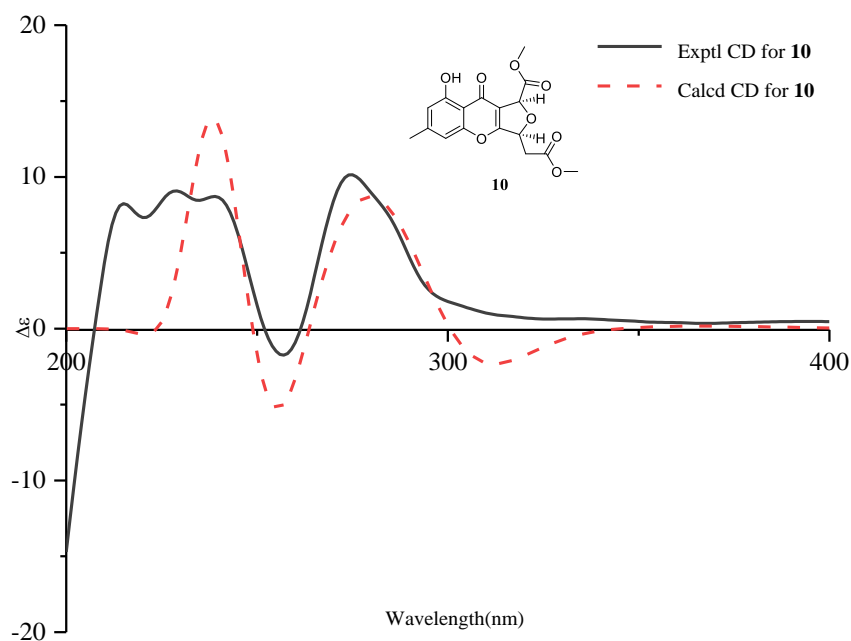

**Figure S5.** Calculated ECD spectra for **10** at the B3LYP/6-311G(d) level in methanol with IEFPCM model ( $\sigma = 0.32$  eV, UV shift 29 nm). Experimental CD spectra of **10** (black line) in MeOH.

**Table S3.** Energy analysis for conformers of **10A~10J** at B3LYP/6-31G(d) level in the gas phase

| Species    | $E'=E+ZPE$   | $E$          | $H$          | $G$          | $\Delta G$ | $\Delta E(\text{kcal/mol})$ | PE%    |
|------------|--------------|--------------|--------------|--------------|------------|-----------------------------|--------|
| <b>10A</b> | -1259.018573 | -1258.995248 | -1258.994304 | -1259.075493 | 0          | 0                           | 37.35% |
| <b>10B</b> | -1259.018243 | -1258.994946 | -1258.994001 | -1259.074519 | 0.000974   | 0.611194253                 | 13.30% |
| <b>10C</b> | -1259.017827 | -1258.994525 | -1258.99358  | -1259.073885 | 0.001608   | 1.009035276                 | 6.79%  |
| <b>10D</b> | -1259.016576 | -1258.993274 | -1258.99233  | -1259.072975 | 0.002518   | 1.580068921                 | 2.59%  |
| <b>10E</b> | -1259.019921 | -1258.996898 | -1258.995954 | -1259.074685 | 0.000808   | 0.507027676                 | 15.86% |
| <b>10F</b> | -1259.019649 | -1258.99674  | -1258.995795 | -1259.073383 | 0.00211    | 1.324045045                 | 3.99%  |
| <b>10G</b> | -1259.019922 | -1258.996899 | -1258.995955 | -1259.074692 | 0.000801   | 0.50263511                  | 15.98% |
| <b>10H</b> | -1259.016416 | -1258.993081 | -1258.992137 | -1259.072682 | 0.002811   | 1.763929205                 | 1.90%  |
| <b>10I</b> | -1259.016685 | -1258.993481 | -1258.992537 | -1259.07197  | 0.003523   | 2.210715969                 | 0.89%  |
| <b>10J</b> | -1259.016394 | -1258.993049 | -1258.992105 | -1259.072351 | 0.003142   | 1.971634849                 | 1.34%  |

$E$ ,  $E'$ ,  $H$ ,  $G$ : total energy, total energy with zero point energy (ZPE), enthalpy, and Gibbs free energy

**Figure S6.** Main conformers of **10** in ECD

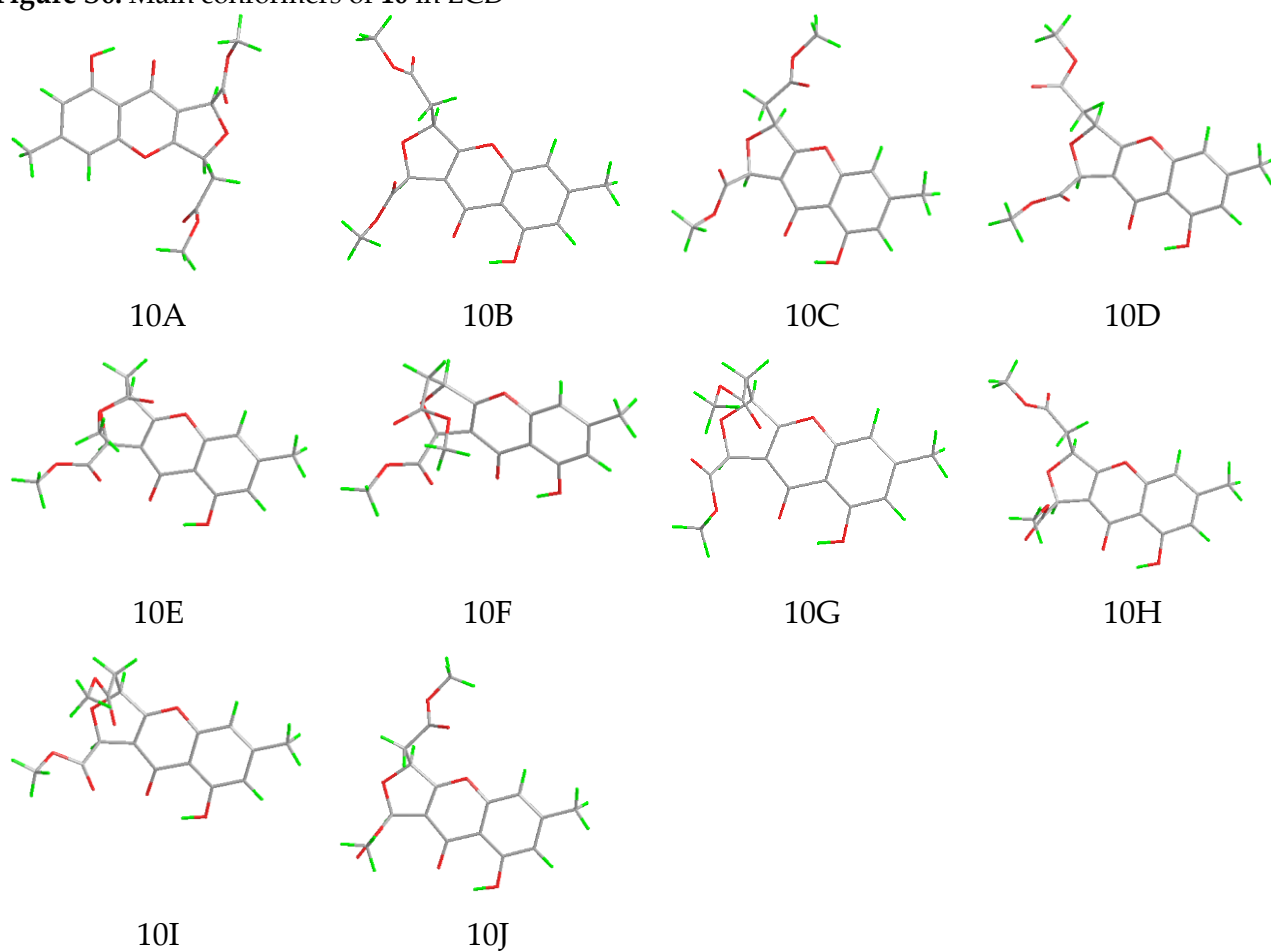

#### S2.4. Computational details for bipolarithone B (**11**) (ECD)

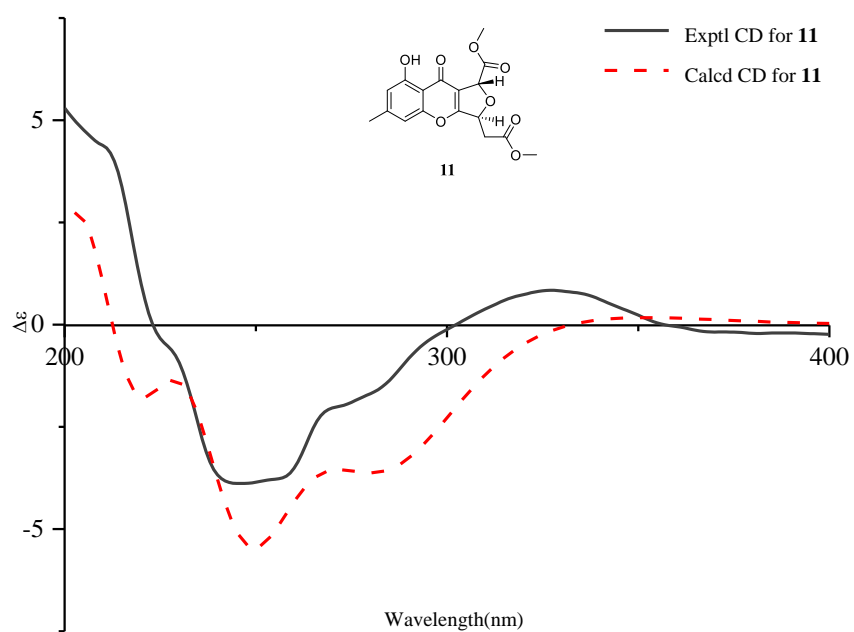

**Figure S7.** Calculated ECD spectra for **11** at the B3LYP/6-311G(d) level in methanol with IEFPCM model ( $\sigma = 0.38$  eV, UV shift 2 nm). Experimental CD spectra of **11** (black line) in MeOH.

**Table S4.** Energy analysis for conformers of **11A~11K** at B3LYP/6-31G(d) level in the gas phase

| Species    | $E'=E+ZPE$ | $E$         | $H$          | $G$          | $\Delta G$ | $\Delta E(\text{kcal/mol})$ | $PE\%$ |
|------------|------------|-------------|--------------|--------------|------------|-----------------------------|--------|
| <b>11A</b> | -1259.0163 | -1258.99289 | -1258.991942 | -1259.073522 | 0.000625   | 0.392193                    | 16.46% |
| <b>11B</b> | -1259.0163 | -1258.99288 | -1258.991935 | -1259.073547 | 0.0006     | 0.376506                    | 16.90% |
| <b>11C</b> | -1259.0156 | -1258.99216 | -1258.991211 | -1259.072575 | 0.001572   | 0.986445                    | 6.03%  |
| <b>11D</b> | -1259.0161 | -1258.99272 | -1258.991774 | -1259.072775 | 0.001372   | 0.860943                    | 7.46%  |
| <b>11E</b> | -1259.0179 | -1258.99463 | -1258.993688 | -1259.074147 | 0          | 0                           | 31.92% |
| <b>11F</b> | -1259.0151 | -1258.99163 | -1258.990684 | -1259.071946 | 0.002201   | 1.381148                    | 3.10%  |
| <b>11G</b> | -1259.0157 | -1258.99224 | -1258.991292 | -1259.072508 | 0.001639   | 1.028488                    | 5.62%  |
| <b>11H</b> | -1259.0151 | -1258.99173 | -1258.990784 | -1259.071808 | 0.002339   | 1.467745                    | 2.68%  |
| <b>11I</b> | -1259.0151 | -1258.99172 | -1258.990774 | -1259.071517 | 0.00263    | 1.65035                     | 1.97%  |
| <b>11J</b> | -1259.0169 | -1258.99356 | -1258.992613 | -1259.073068 | 0.001079   | 0.677083                    | 10.17% |
| <b>11K</b> | -1259.0141 | -1258.99062 | -1258.989679 | -1259.070653 | 0.003494   | 2.192518                    | 0.79%  |

$E, E', H, G$ : total energy, total energy with zero point energy (ZPE), enthalpy, and Gibbs free energy

**Figure S8.** Main conformers of **11** in ECD

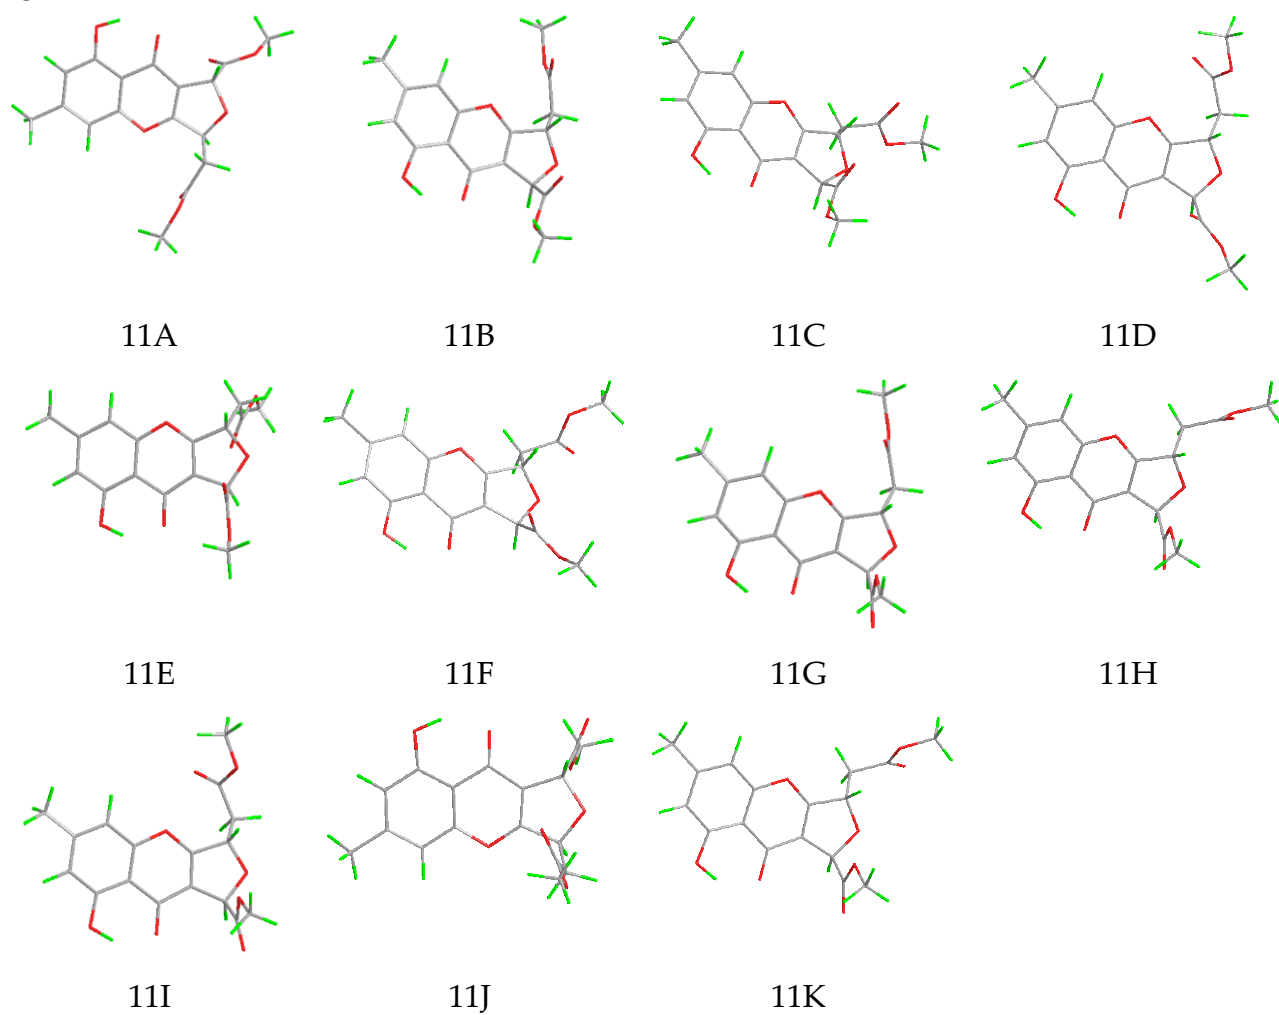

### S2.5. Computational details for bipolarithone C (**12**) (ECD)

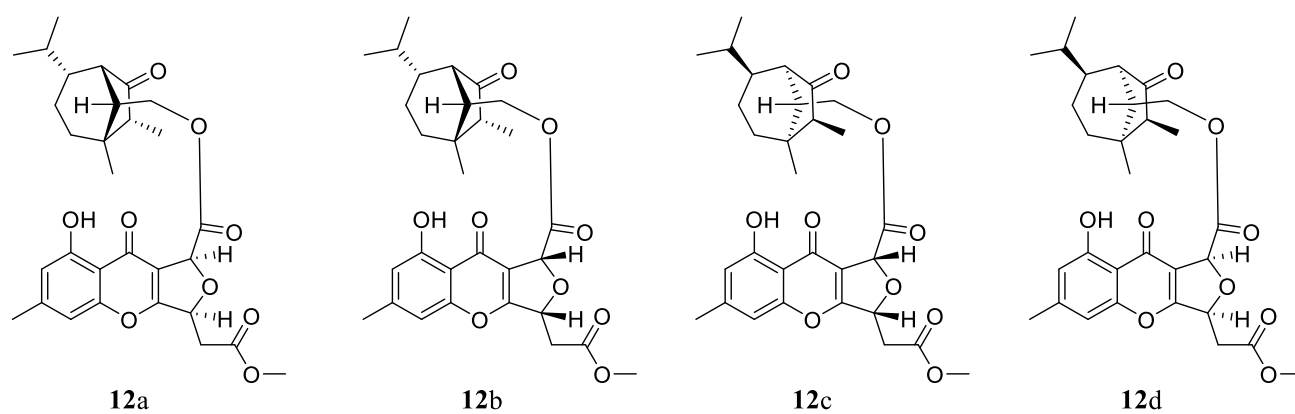

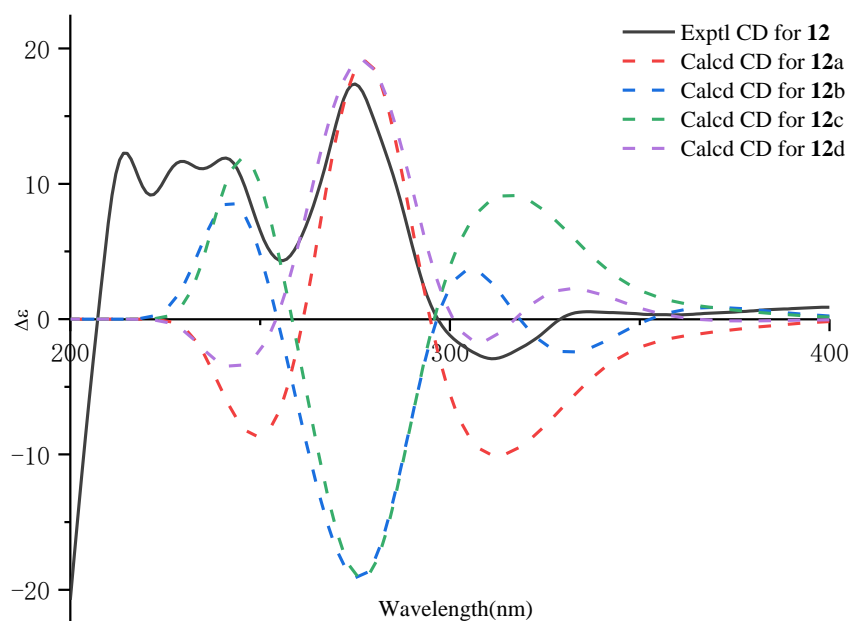

**Figure S9.** Calculated ECD spectra for **12a–12d** at the B3LYP/6-311G(d) level in methanol with IEFPCM model ( $\sigma = 0.30$  eV, UV shift 26 nm). Experimental CD spectra of **12** (black line) in MeOH.

**Table S5.** Energy analysis for conformers of **12aA–12aK** at B3LYP/6-31G(d) level in the gas phase

| Species     | $E'=E+ZPE$   | $E$          | $H$          | $G$          | $\Delta G$ | $\Delta E(\text{kcal/mol})$ | PE%    |
|-------------|--------------|--------------|--------------|--------------|------------|-----------------------------|--------|
| <b>12aA</b> | -1841.477567 | -1841.440453 | -1841.439509 | -1841.547406 | 0.000796   | 0.499498                    | 24.42% |
| <b>12aB</b> | -1841.480266 | -1841.443482 | -1841.442538 | -1841.548202 | 0          | 0                           | 56.78% |
| <b>12aC</b> | -1841.475594 | -1841.438502 | -1841.437558 | -1841.545011 | 0.003191   | 2.002383                    | 1.93%  |
| <b>12aD</b> | -1841.469323 | -1841.431763 | -1841.430818 | -1841.542825 | 0.005377   | 3.374119                    | 0.19%  |
| <b>12aE</b> | -1841.476806 | -1841.439623 | -1841.438679 | -1841.546971 | 0.001231   | 0.772464                    | 15.40% |
| <b>12aF</b> | -1841.473561 | -1841.436386 | -1841.435442 | -1841.544096 | 0.004106   | 2.576554                    | 0.73%  |
| <b>12aG</b> | -1841.471611 | -1841.43455  | -1841.433605 | -1841.541743 | 0.006459   | 4.053084                    | 0.06%  |
| <b>12aH</b> | -1841.468618 | -1841.431083 | -1841.430139 | -1841.541659 | 0.006543   | 4.105795                    | 0.06%  |
| <b>12aI</b> | -1841.47161  | -1841.434552 | -1841.433608 | -1841.541673 | 0.006529   | 4.09701                     | 0.06%  |
| <b>12aJ</b> | -1841.471135 | -1841.434062 | -1841.433118 | -1841.541871 | 0.006331   | 3.972763                    | 0.07%  |
| <b>12aK</b> | -1841.474176 | -1841.437091 | -1841.436147 | -1841.54328  | 0.004922   | 3.088602                    | 0.31%  |

$E$ ,  $E'$ ,  $H$ ,  $G$ : total energy, total energy with zero point energy (ZPE), enthalpy, and Gibbs free energy



**Figure S10.** Main conformers of **12a** in ECD

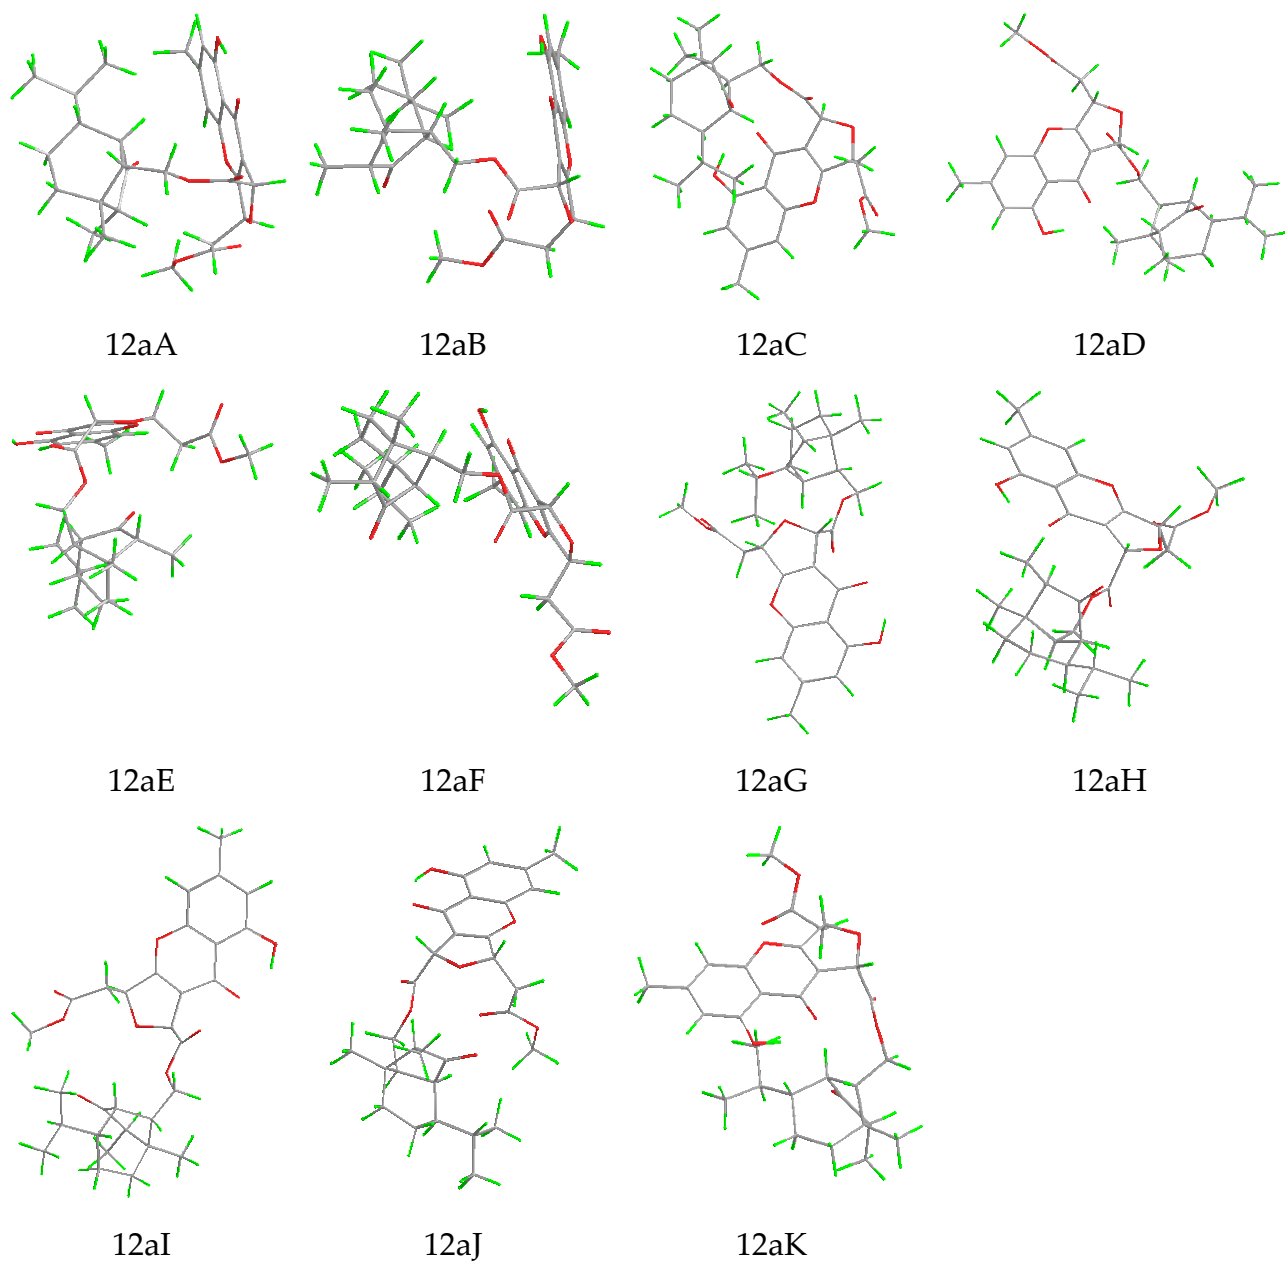

**Table S6.** Energy analysis for conformers of **12bA~12bF** at B3LYP/6-31G(d) level in the gas phase

| Species     | $E'=E+ZPE$   | $E$          | $H$          | $G$          | $\Delta G$ | $\Delta E(\text{kcal/mol})$ | $PE\%$ |
|-------------|--------------|--------------|--------------|--------------|------------|-----------------------------|--------|
| <b>12bA</b> | -1841.479288 | -1841.442477 | -1841.441533 | -1841.547737 | 0.002644   | 1.659135                    | 4.06%  |
| <b>12bB</b> | -1841.480583 | -1841.443646 | -1841.442702 | -1841.549573 | 0.000808   | 0.507028                    | 28.40% |
| <b>12bC</b> | -1841.479168 | -1841.441893 | -1841.440948 | -1841.550381 | 0          | 0                           | 66.88% |
| <b>12bD</b> | -1841.470431 | -1841.433084 | -1841.432139 | -1841.542772 | 0.007609   | 4.77472                     | 0.02%  |
| <b>12bE</b> | -1841.470006 | -1841.432677 | -1841.431732 | -1841.542051 | 0.00833    | 5.227154                    | 0.01%  |
| <b>12bF</b> | -1841.475978 | -1841.439043 | -1841.438098 | -1841.545978 | 0.004403   | 2.762924                    | 0.63%  |

$E$ ,  $E'$ ,  $H$ ,  $G$ : total energy, total energy with zero point energy ( $ZPE$ ), enthalpy, and Gibbs free energy

**Figure S11.** Main conformers of **12b** in ECD

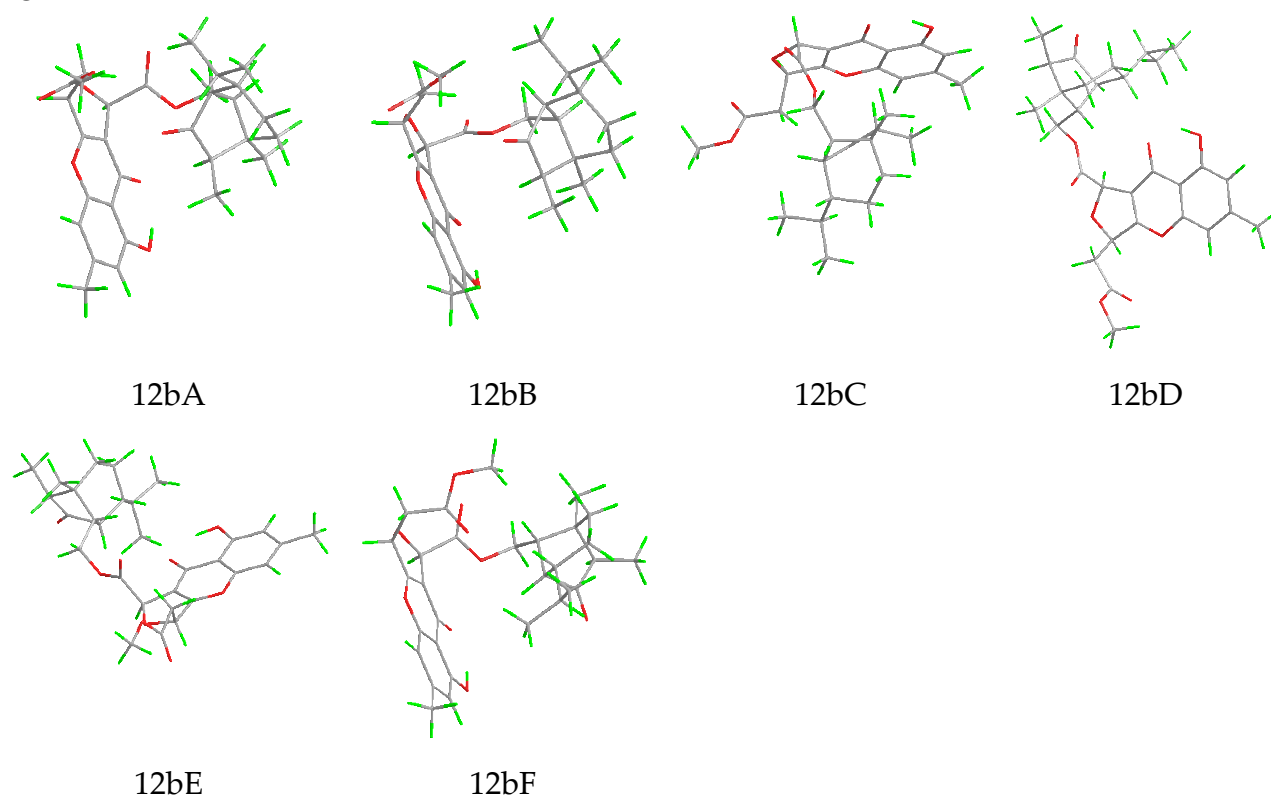

**Table S7.** Energy analysis for conformers of **12cA~12cM** at B3LYP/6-31G(d) level in the gas phase

| Species     | $E'=E+ZPE$   | $E$          | $H$          | $G$          | $\Delta G$ | $\Delta E(\text{kcal/mol})$ | $PE\%$ |
|-------------|--------------|--------------|--------------|--------------|------------|-----------------------------|--------|
| <b>12cA</b> | -1841.477567 | -1841.440453 | -1841.439509 | -1841.547406 | 0.000798   | 0.500752581                 | 19.02% |
| <b>12cB</b> | -1841.480266 | -1841.443481 | -1841.442537 | -1841.548204 | 0          | 0                           | 44.31% |
| <b>12cC</b> | -1841.475594 | -1841.438502 | -1841.437558 | -1841.54501  | 0.003194   | 2.004265343                 | 1.50%  |
| <b>12cD</b> | -1841.469323 | -1841.431763 | -1841.430818 | -1841.542825 | 0.005379   | 3.3753736                   | 0.15%  |
| <b>12cE</b> | -1841.476806 | -1841.439623 | -1841.438679 | -1841.546969 | 0.001235   | 0.774974232                 | 11.97% |
| <b>12cF</b> | -1841.474586 | -1841.437285 | -1841.436341 | -1841.54594  | 0.002264   | 1.420681508                 | 4.02%  |
| <b>12cG</b> | -1841.473561 | -1841.436386 | -1841.435442 | -1841.544093 | 0.004111   | 2.579691554                 | 0.57%  |
| <b>12cH</b> | -1841.469825 | -1841.43259  | -1841.431645 | -1841.5412   | 0.007004   | 4.395076538                 | 0.03%  |
| <b>12cI</b> | -1841.468618 | -1841.431083 | -1841.430139 | -1841.541659 | 0.006545   | 4.107049677                 | 0.04%  |
| <b>12cJ</b> | -1841.477451 | -1841.440311 | -1841.439367 | -1841.547357 | 0.000847   | 0.531500547                 | 18.06% |
| <b>12cK</b> | -1841.471134 | -1841.434062 | -1841.433118 | -1841.541873 | 0.006331   | 3.972762645                 | 0.05%  |
| <b>12cL</b> | -1841.474177 | -1841.437092 | -1841.436147 | -1841.543282 | 0.004922   | 3.088601759                 | 0.24%  |
| <b>12cM</b> | -1841.467596 | -1841.430163 | -1841.429219 | -1841.541311 | 0.006893   | 4.325422983                 | 0.03%  |

$E$ ,  $E'$ ,  $H$ ,  $G$ : total energy, total energy with zero point energy (ZPE), enthalpy, and Gibbs free energy

**Figure S12.** Main conformers of **12c** in ECD

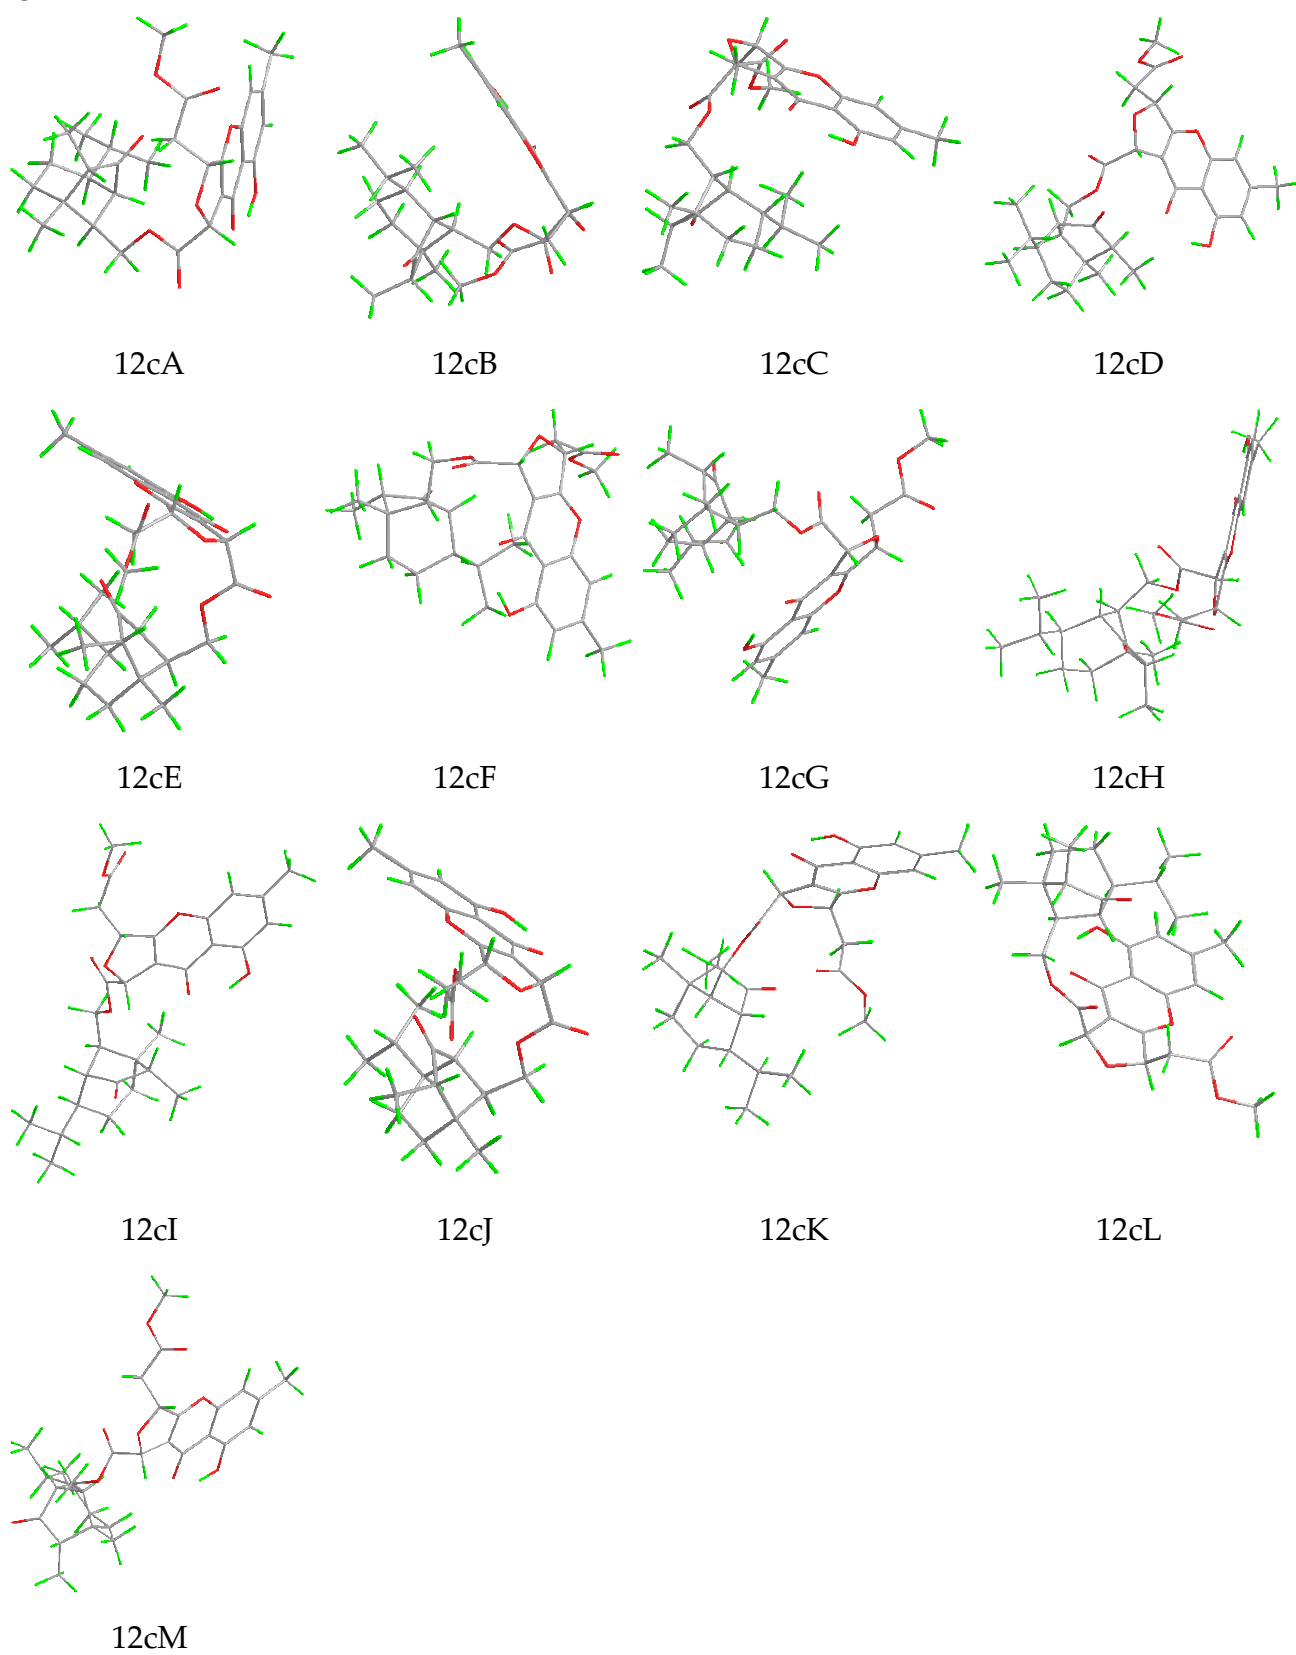

**Table S8.** Energy analysis for conformers of **12dA~12dF** at B3LYP/6-31G(d) level in the gas phase

| Species     | $E'=E+ZPE$   | $E$          | $H$          | $G$          | $\Delta G$ | $\Delta E(\text{kcal/mol})$ | $PE\%$ |
|-------------|--------------|--------------|--------------|--------------|------------|-----------------------------|--------|
| <b>12dA</b> | -1841.479288 | -1841.442477 | -1841.441533 | -1841.547737 | 0.002647   | 1.661017646                 | 3.03%  |
| <b>12dB</b> | -1841.480583 | -1841.443647 | -1841.442703 | -1841.54957  | 0.000814   | 0.510792733                 | 21.12% |
| <b>12dC</b> | -1841.479169 | -1841.441893 | -1841.440949 | -1841.550384 | 0          | 0                           | 50.05% |
| <b>12dD</b> | -1841.475978 | -1841.439043 | -1841.438099 | -1841.545975 | 0.004409   | 2.766689385                 | 0.47%  |
| <b>12dE</b> | -1841.480098 | -1841.44304  | -1841.442095 | -1841.549741 | 0.000643   | 0.403488608                 | 25.32% |
| <b>12dF</b> | -1841.470432 | -1841.43309  | -1841.432146 | -1841.542697 | 0.007687   | 4.823665526                 | 0.01%  |

$E$ ,  $E'$ ,  $H$ ,  $G$ : total energy, total energy with zero point energy (ZPE), enthalpy, and Gibbs free energy

**Figure S13.** Main conformers of **12d** in ECD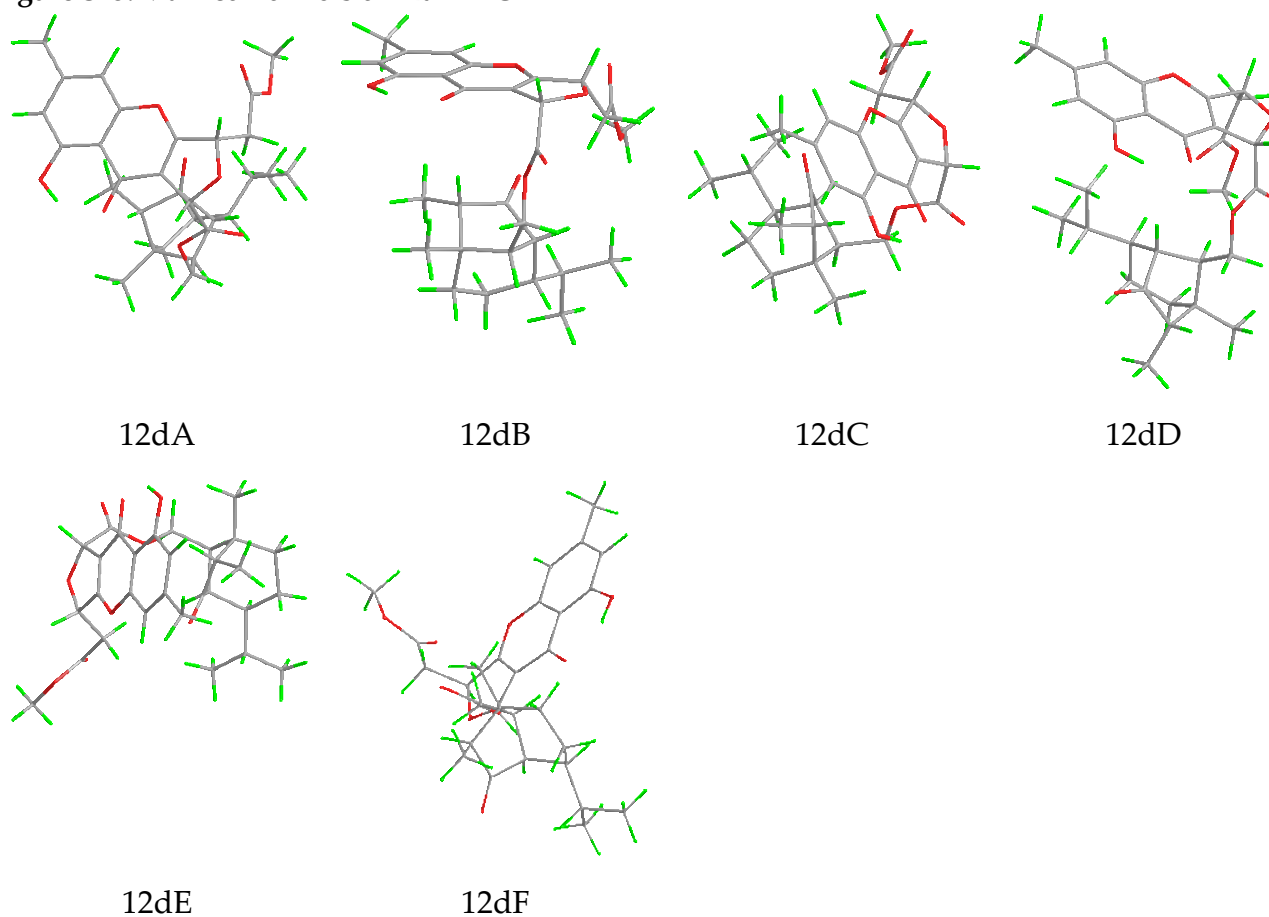

## S2.6. Computational details for 12a and 12d (NMR)

All the optimized conformers were subjected to Gauge Independent Atomic Orbital (GIAO) calculations of their  $^{13}\text{C}$  NMR chemical shifts using density functional theory (DFT) at the mPW1PW91/6-311+G (d, p) level with the PCM model in methanol. The calculated NMR data of these conformers were averaged according to the Boltzmann distribution theory and their relative Gibbs free energy. The  $^{13}\text{C}$  NMR chemical shifts for TMS were also calculated by the same procedures and used as the reference. After calculation, the experimental and calculated data were evaluated by the improved probability DP4+ method.

Table S9. DP4+ analysis results of 12a (Isomer 1) and 12d (Isomer 2)

| Functional |      | Solvent?     | Basis Set    |          | Type of Data      |          |          |
|------------|------|--------------|--------------|----------|-------------------|----------|----------|
| mPW1PW91   |      | PCM          | 6-311+G(d,p) |          | Shielding Tensors |          |          |
|            |      | DP4+         | 100.00%      | 0.00%    | –                 | –        | –        |
| Nuclei     | sp2? | Experimental | Isomer 1     | Isomer 2 | Isomer 3          | Isomer 4 | Isomer 5 |
| C          | x    | 221.6        | -47.3        | -46.8    |                   |          |          |
| C          |      | 50.6         | 131.1        | 128.2    |                   |          |          |
| C          |      | 42.1         | 141.2        | 136.6    |                   |          |          |
| C          |      | 36.1         | 148.6        | 144.6    |                   |          |          |
| C          |      | 26.0         | 157.4        | 154.0    |                   |          |          |
| C          |      | 50.2         | 135.4        | 129.2    |                   |          |          |
| C          |      | 51.5         | 131.9        | 128.0    |                   |          |          |
| C          |      | 22.1         | 163.7        | 160.1    |                   |          |          |
| C          |      | 30.0         | 152.7        | 150.1    |                   |          |          |
| C          |      | 20.4         | 166.5        | 160.5    |                   |          |          |
| C          |      | 21.3         | 164.3        | 161.8    |                   |          |          |
| C          |      | 6.5          | 178.6        | 174.9    |                   |          |          |
| C          |      | 51.6         | 131.6        | 128.7    |                   |          |          |
| C          |      | 65.3         | 120.8        | 116.1    |                   |          |          |
| C          | x    | 161.1        | 19.6         | 18.7     |                   |          |          |
| C          | x    | 113.6        | 68.7         | 67.1     |                   |          |          |
| C          | x    | 147.6        | 32.1         | 30.8     |                   |          |          |
| C          | x    | 108.1        | 74.7         | 72.3     |                   |          |          |
| C          | x    | 157.4        | 23.2         | 22.1     |                   |          |          |
| C          |      | 78.2         | 103.4        | 101.2    |                   |          |          |
| C          |      | 37.7         | 144.9        | 140.1    |                   |          |          |
| C          | x    | 169.5        | 9.2          | 10.9     |                   |          |          |
| C          |      | 79.5         | 102.6        | 99.4     |                   |          |          |
| C          | x    | 114.5        | 67.3         | 64.9     |                   |          |          |
| C          | x    | 178.2        | 4.1          | 3.4      |                   |          |          |
| C          | x    | 109.0        | 73.2         | 71.7     |                   |          |          |
| C          | x    | 167.7        | 10.3         | 10.5     |                   |          |          |
| C          |      | 22.5         | 162.9        | 158.5    |                   |          |          |
| C          | x    | 169.4        | 8.3          | 7.8      |                   |          |          |
| C          |      | 52.4         | 131.8        | 129.7    |                   |          |          |

| Functional       |  | Solvent? | Basis Set    |          | Type of Data      |          |          |
|------------------|--|----------|--------------|----------|-------------------|----------|----------|
| mPW1PW91         |  | PCM      | 6-311+G(d,p) |          | Shielding Tensors |          |          |
|                  |  | Isomer 1 | Isomer 2     | Isomer 3 | Isomer 4          | Isomer 5 | Isomer 6 |
| sDP4+ (H data)   |  | –        | –            | –        | –                 | –        | –        |
| sDP4+ (C data)   |  | 39.00%   | 61.00%       | –        | –                 | –        | –        |
| sDP4+ (all data) |  | 39.00%   | 61.00%       | –        | –                 | –        | –        |
| uDP4+ (H data)   |  | –        | –            | –        | –                 | –        | –        |
| uDP4+ (C data)   |  | 100.00%  | 0.00%        | –        | –                 | –        | –        |
| uDP4+ (all data) |  | 100.00%  | 0.00%        | –        | –                 | –        | –        |
| DP4+ (H data)    |  | –        | –            | –        | –                 | –        | –        |
| DP4+ (C data)    |  | 100.00%  | 0.00%        | –        | –                 | –        | –        |
| DP4+ (all data)  |  | 100.00%  | 0.00%        | –        | –                 | –        | –        |

## S2.7. Computational details for bipolarithone D (**13**) (ECD)

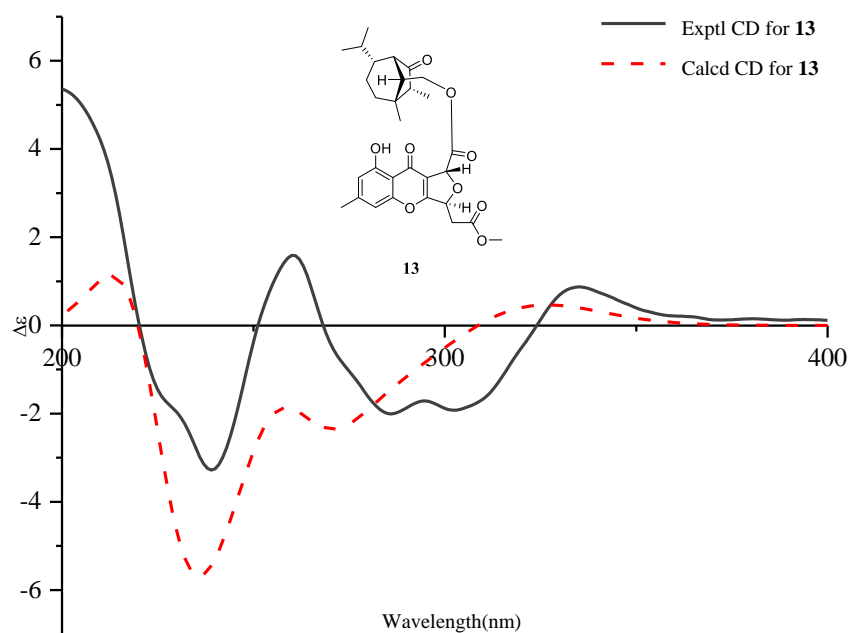

**Figure S14.** Calculated ECD spectra for **13** at the B3LYP/6-311G(d) level in methanol with IEFPCM model ( $\sigma = 0.25$  eV, UV shift -7 nm). Experimental CD spectra of **13** (black line) in MeOH.

**Table S10.** Energy analysis for conformers of **13A**~**13I** at B3LYP/6-31G(d) level in the gas phase

| Species    | $E'=E+ZPE$   | $E$          | $H$          | $G$          | $\Delta G$ | $\Delta E(\text{kcal/mol})$ | PE%    |
|------------|--------------|--------------|--------------|--------------|------------|-----------------------------|--------|
| <b>13A</b> | -1841.468163 | -1841.430722 | -1841.429777 | -1841.540899 | 0.008079   | 5.06964925                  | 0.01%  |
| <b>13B</b> | -1841.476079 | -1841.438801 | -1841.437856 | -1841.547017 | 0.001961   | 1.230546129                 | 9.76%  |
| <b>13C</b> | -1841.472092 | -1841.434953 | -1841.434009 | -1841.543804 | 0.005174   | 3.246734153                 | 0.32%  |
| <b>13D</b> | -1841.469919 | -1841.43262  | -1841.431676 | -1841.542167 | 0.006811   | 4.273967204                 | 0.06%  |
| <b>13E</b> | -1841.476788 | -1841.439463 | -1841.438519 | -1841.548978 | 0          | 0                           | 78.03% |
| <b>13F</b> | -1841.473712 | -1841.436572 | -1841.435628 | -1841.545092 | 0.003886   | 2.438501917                 | 1.27%  |
| <b>13G</b> | -1841.474043 | -1841.436633 | -1841.435689 | -1841.546529 | 0.002449   | 1.536770766                 | 5.82%  |
| <b>13H</b> | -1841.472688 | -1841.435529 | -1841.434585 | -1841.544133 | 0.004845   | 3.040283527                 | 0.46%  |
| <b>13I</b> | -1841.475408 | -1841.438401 | -1841.437457 | -1841.546233 | 0.002745   | 1.722513578                 | 4.25%  |

$E$ ,  $E'$ ,  $H$ ,  $G$ : total energy, total energy with zero point energy (ZPE), enthalpy, and Gibbs free energy



**Figure S15.** Main conformers of **13** in ECD

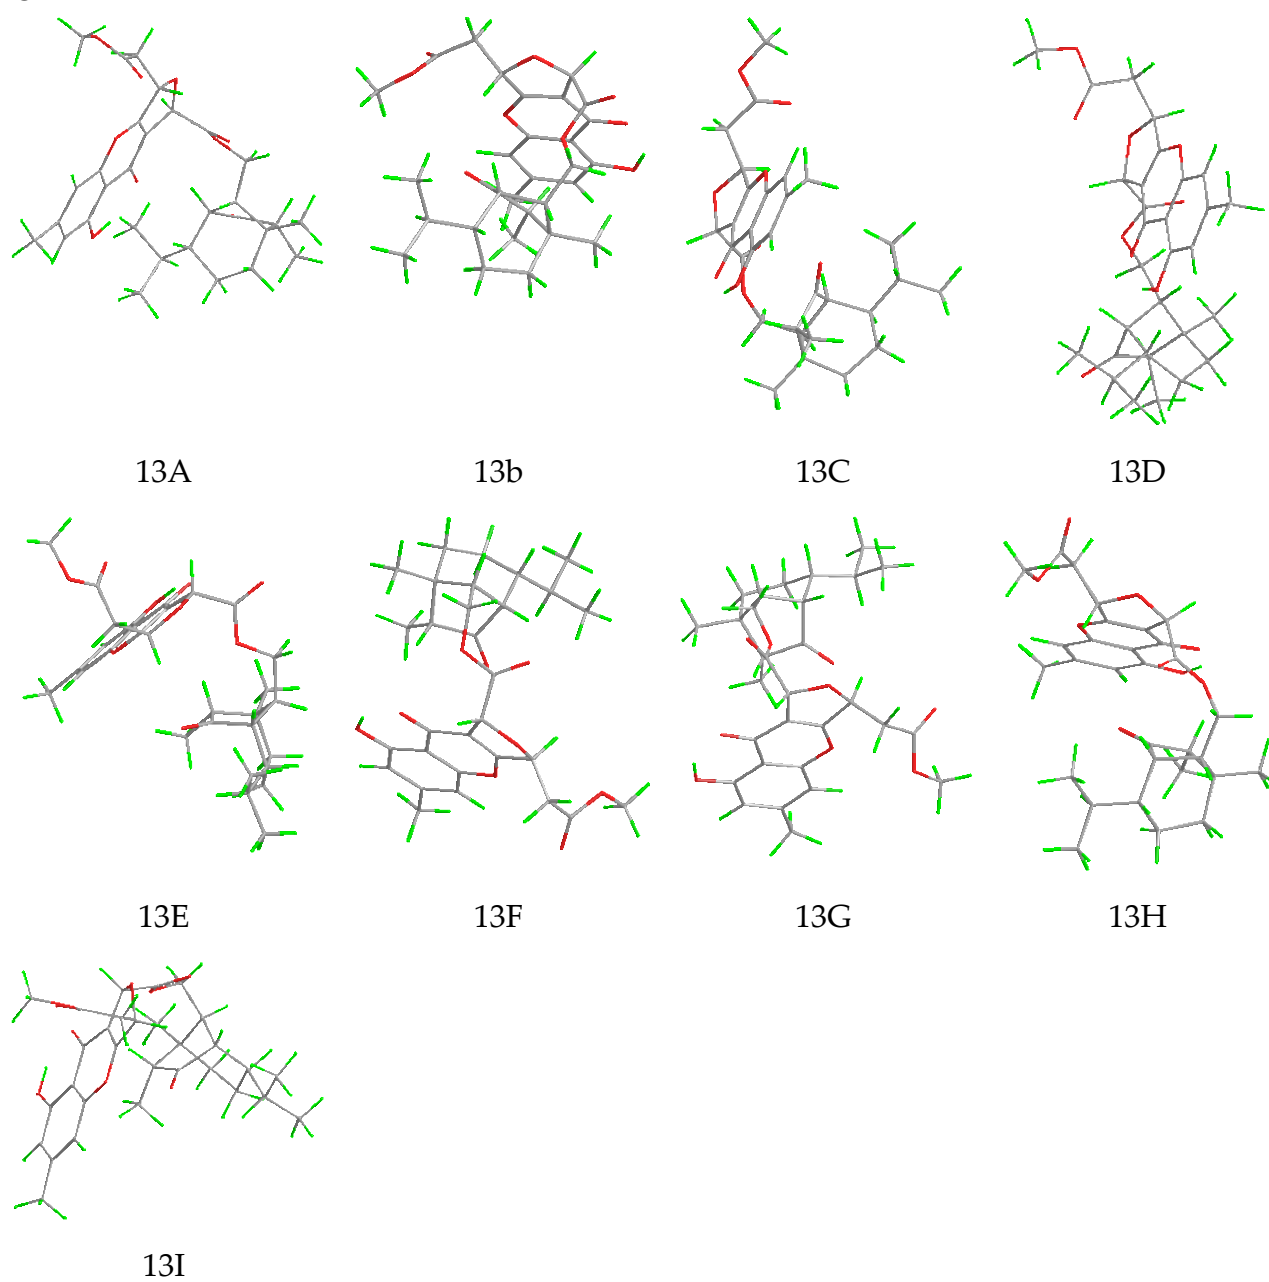

Supplement: s1 [file s1]
